# Supplementary material for: Discovery of cisplatin-binding proteins by competitive cysteinome profiling
Source: Royal Society of Chemistry journal article supplement (doi:10.1039/d3cb00042g), 2023-01-01
Supplement: d3cb00042g1.pdf [file d3cb00042g1.pdf]

**Supporting Information for:**

**Discovery of Cisplatin-binding Proteins by Competitive  
Cysteinome Profiling**

Xianghe Wang<sup>1</sup>, Yihai Zhang<sup>1</sup> and Chu Wang<sup>1,2\*</sup>

**Affiliations:**

<sup>1</sup>Synthetic and Functional Biomolecules Center, Beijing National Laboratory for  
Molecular Sciences, Key Laboratory of Bioorganic Chemistry and Molecular  
Engineering of Ministry of Education, College of Chemistry and Molecular  
Engineering, Peking University, Beijing, China.

<sup>2</sup>Peking-Tsinghua Center for Life Sciences, Academy for Advanced  
Interdisciplinary Studies, Peking University, Beijing, China.

\*Correspondence to: [chuwang@pku.edu.cn](mailto:chuwang@pku.edu.cn)

1 **Supplementary Table**

2

3 **Table S1:** List of cisplatin-binding sites identified by rdTOP-ABPP. [See the  
4 attached excel file.]

5

## 1 Supplementary Figures

2

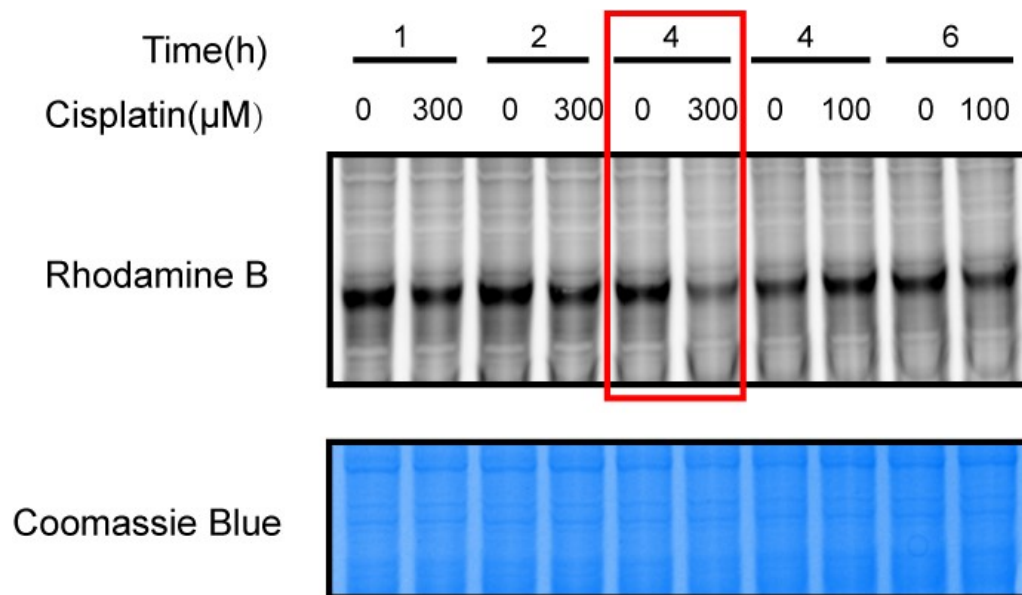

3

4 **Figure. S1: Optimization of the conditions of cisplatin incubation for rdTOP-ABPP.**

5 MCF-7 cells were incubated with 0, 100 or 300 μM cisplatin for 1-6 h as indicated. Strong  
6 competition on the IAYne probe labeling was observed when cells were incubated with 300  
7 μM cisplatin for 4 h.

8

9

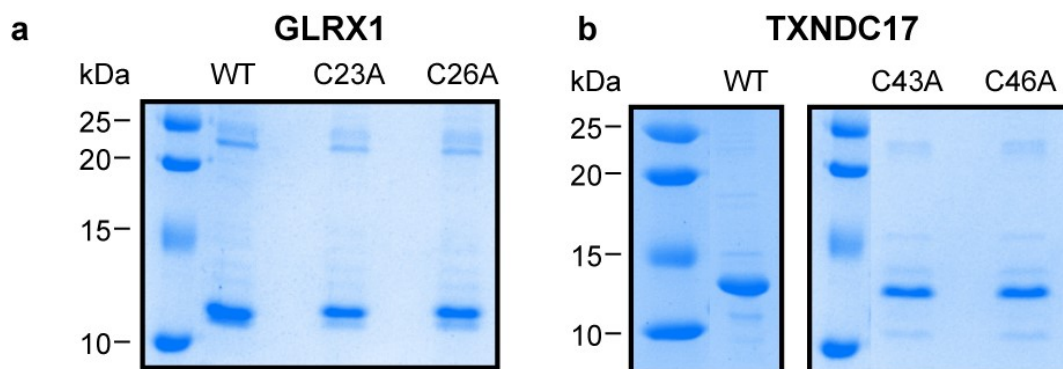

10

11 **Figure. S2: Purification of GLRX1 and TXNDC17.** (a) GLRX1 (b) TXNDC17. Wild-type  
12 and mutants were recombinantly expressed and purified from E. coli. by nickel-affinity  
13 chromatography.

14

15

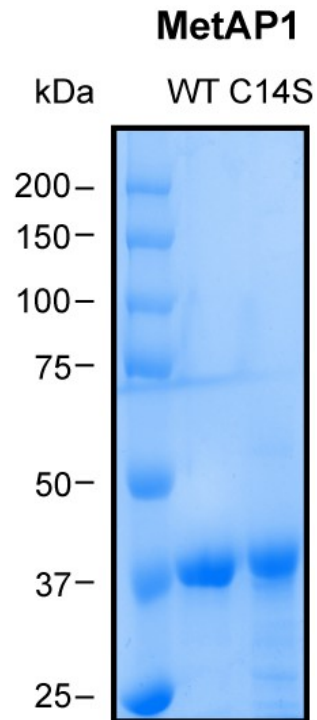

1

2 **Figure. S3: Purification of MetAP1 and its C14S mutant.** WT and mutant of MetAP1

3 was recombinantly expressed and purified from *E. coli*. by nickel-affinity chromatography.

4

5

6

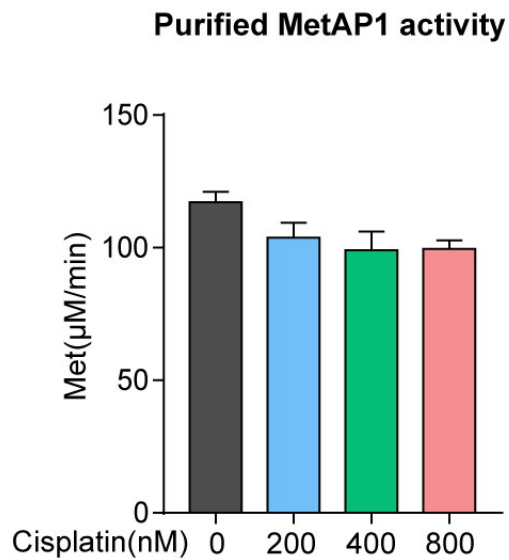

7

8 **Figure. S4: Effect of cisplatin on the activity of purified MetAP1.** Activity is measured

9 by monitoring the release of Met from the substrate heptapeptide MAHAIHY. Cisplatin up

10 to 800nM does not show inhibition to the activity of purified MetAP1.

## 1 **Materials and Methods**

### 2 **Cell culture**

3 MCF-7 cells were maintained and cultured in Dulbecco's modified Eagle's  
4 medium (DMEM, Gibco) with 10% (vol/vol) FBS, 100 U/mL penicillin, and 100  
5 mg/mL streptomycin in a humidified atmosphere at 37°C with 5% CO<sub>2</sub>. The cells  
6 were harvested by scraping and the pellets were washed with phosphate  
7 buffered saline (PBS). After centrifugation, the cells were collected, frozen and  
8 stored at -80°C.

9

### 10 **Plasmid construction**

11 GLRX1, TXNDC17, MetAP1 genes were amplified from Hela cDNAs by  
12 PCR, and subcloned into the pet-28a(+) expression vector for purification. All  
13 site-specific mutants were generated using the PCR mutagenesis method and  
14 verified by sequencing. Primer sequences are designed as following:

15 GLRX1-F: CTCGAGTGCGGCCGCAAGCTTCTGCAGAGCTCCAATCTGC

16 GLRX1-R: AGAAGGAGATATACCATGGCTCAAGAGTTTGTGAACTG

17 GLRX1-C23A-F: CCCCGTACTGCAGGAGGGCCCAAG

18 GLRX1-C23A-R: CCTGCAGTACGGGGAGGTGGGCTTGA

19 GLRX1-C26A-F: CCAGGAGGGCCCAAGAGATCCTCAGTCAATTGC

20 GLRX1-C26A-R: GGGCCCTCCTGGAGTACGGGCAGG

21 TXNDC17-F: TAAGAAGGAGATATACCATGGCCCGCTATGAGGAG

22 TXNDC17-R:

23 CTCGAGTGCGGCCGCAAGCTTATCTTCAGAGAACAACATTTCCACC

24 TXNDC17-C43A-F: GGGAAAAGCTGGTCCCCCGACTGCGTGC

25 TXNDC17-C43A-R: GACCAGCTTTTCCCCCGGCG

26 TXNDC17-C46A-F: GGTGCCCCGACTCCGTGCAGGCTG

27 TXNDC17-C46A-R: GAGTCGGGGCACCAGCTTTTCCCC

28 MetAP1-F: TATACCATGGCGGCCGTGGA

29 MetAP1-R: TGCGGCAAATTGAGACATGAAGTGAGGCC

1 MetAP1-C14S-F: CCAGCAGTGAGGCCAAGCTC

2 MetAP1-C14S-R: CTCACTGCTGGAGCCGTCTG

3

#### 4 **Construction of MCF-7 MetAP1 KO cell lines**

5 To generate MCF-7 MetAP1 knockout (KO) cell lines, sgRNA sequences  
6 were ligated into LentiCRISPRv2 plasmid and then co-transfected with viral  
7 packaging plasmids (psPAX2 and pMD2.g) into HEK293T cells. The cells were  
8 replaced with fresh medium at 6 h. MCF-7 cells were plated in 6 cm dishes. Two  
9 days post transfection, viral supernatant was filtered through 0.45  $\mu$ m strainer.  
10 MCF7 cells were infected by viral supernatant and selected by 1 mg/mL  
11 puromycin for about 1 week. By multiple dilution of positive population into 10  
12 cells per mL and manual checking of single cell, the single positive population  
13 was sorted. Loss of MetAP1 protein expression was confirmed by  
14 immunoblotting. LentiCRISPRv2 plasmid, psPAX2 and pMD2.g-based plasmid  
15 were generously gifted by Prof. Ying Liu at Peking University.

16

#### 17 **In-gel fluorescence analysis for cells**

18 After MCF-7 cells were treated by cisplatin (Harveybio) for 1-6 h in the  
19 concentration of 100 or 300  $\mu$ M, they were collected, suspended in PBS with  
20 0.1% Triton X-100 (Sigma-Aldrich) and sonicated on ice. The soluble lysates  
21 were collected after ultracentrifugation at 20,000 g for 30 mins at 4 °C. Protein  
22 concentration was detected through the BCA protein assay Kit (Pierce) on a  
23 microplate reader (Bio-Rad) and quantified to 2 mg/mL. The protein in lysates  
24 (100  $\mu$ L per aliquot) were labeled by the IAYne probe (100  $\mu$ M) for 1 h at 25°C.  
25 The labeled lysates reacted with 110  $\mu$ M rhodamine-N<sub>3</sub> in the existence of 1 mM  
26 Tris(2-carboxyethyl) phosphine (TCEP, Sigma-Aldrich), 100  $\mu$ M Tris-  
27 (benzyltriazolylmethyl) amine (TBTA) (Sigma-Aldrich), and 1 mM CuSO<sub>4</sub>  
28 (Sigma-Aldrich) at room temperature with constant shaking on a thermo mixer  
29 for 1 h. After reaction, samples were separated by 10% SDS-PAGE. The image

1 of rhodamine fluorescence was imaged by ChemiDoc MP (Bio-rad) imaging  
2 system. The gel were stained by Coomassie staining (CBB) as loading control.  
3

#### 4 **Quantitative profiling of cisplatin binding proteins and sites.**

5 For quantifying cisplatin binding proteins and sites in proteomes from MCF-  
6 7 cells, cells per well were incubated by 300  $\mu$ M cisplatin in 15 cm dishes  
7 overnight in serum-free media (DMEM). The cells were collected, washed by  
8 PBS for three times and centrifugated at 1400 g for 3 min. The cells were lysed  
9 in 1000  $\mu$ L of PBS with 0.1% Triton X-100 (Sigma-Aldrich). After sonication on  
10 ice, the cell lysates were centrifugated for 20000 g, 30 min at 4 °C to remove  
11 the insoluble substances. Protein concentration was detected by using the BCA  
12 protein assay Kit and quantified to 2 mg/mL for 1 mL. The protein in lysates  
13 (1000  $\mu$ L per aliquot) were labeled by the IAYne probe (100  $\mu$ M) for 1 h at 25°C.  
14 Cell lysates were then reacted with 1 mM CuSO<sub>4</sub>, 100  $\mu$ M TBTA ligand, 110  $\mu$ M  
15 acid-cleavable azide-biotin tag and 1 mM TCEP for 1 h on thermo mixer at 29°C.  
16 The labeled proteins of click-labeled lysates were centrifuged for 8000 g, 5 min  
17 at 4 °C and washed three times with 1 mL cold methanol.

18 The precipitated proteomes were resuspended in 1 mL PBS with 1.2%  
19 SDS. The samples were sonicated and heated at 90 °C for 10 min to dissolve  
20 the proteins, followed by centrifuging at 19000 g, 2 min at room temperature to  
21 remove the remaining cupric ion. The solution was diluted with 5 mL of PBS  
22 containing 100  $\mu$ L of prewashed streptavidin Beads (Thermo Fisher Scientific)  
23 and incubated for 3 h at 29 °C on a rotator. The beads were washed by 5 mL  
24 PBS and 5 ml distilled water and were centrifugated in 1400 g, 3 min for three  
25 times. The resulting beads were resuspended in 500  $\mu$ L PBS with 6 M urea and  
26 10 mM DTT (200 mM DTT as storage) at 37 °C for 30 min and alkylated (400  
27 mM DTT as storage) by addition of 20 mM iodoacetamide at 35 °C for 30 min in  
28 the dark. The beads were washed and collected by centrifugation (1700 g,  
29 5 min) and resuspended in 200  $\mu$ L of 100 mM triethylammonium bicarbonate

1 (TEAB) buffer (Sigma) with 1 M urea, 1 mM  $\text{CaCl}_2$  and 10 ng/ $\mu\text{L}$  trypsin  
2 (Promega). Trypsin digestion was performed at 37 °C in a thermomixer for 16  
3 h.

4 The beads were collected by centrifugation and washed with 1 ml, 100 mM  
5 TEAB buffer for three times, and suspended in 100  $\mu\text{L}$  TEAB buffer. The  
6 peptides on beads were reacted with 8  $\mu\text{L}$  of 4%  $\text{D}^{13}\text{CDO}$  (Sigma) and 8  $\mu\text{L}$  of  
7 0.6 M  $\text{NaBH}_3\text{CN}$  for samples from cisplatin treated, HCHO (Sigma) and 8  $\mu\text{L}$  of  
8 0.6 M  $\text{NaBH}_3\text{CN}$  for samples from normal cells. The reaction was incubated for  
9 2 h at 29°C on a thermo mixer and the beads were washed with 1 mL  $\text{H}_2\text{O}$  for  
10 four times. The labeled proteins on beads were combined and cleaved by using  
11 200  $\mu\text{L}$  of 2% formic acid solution (sigma) for twice. The eluted peptides were  
12 collected for LC-MS/MS analysis.

13

#### 14 **Identification of cisplatin-adducted peptides from purified GLRX1 and** 15 **TXNDC17 by LC-MS/MS**

16 For identifying cisplatin-adducted peptides from purified GLRX1 and  
17 TXNDC17, proteins were quantified by using the BCA protein assay Kit into 1  
18 mg/mL for 100  $\mu\text{L}$ . 100  $\mu\text{M}$  TCEP was added into proteins for 30 min at room  
19 temperature. Each protein was incubated by 300  $\mu\text{M}$  cisplatin for 1 h. Excessive  
20 cisplatin was removed and the buffer was changed from PBS into 100 mM  
21 TEAB with 6 M urea by filter. The samples were incubated with 10 mM DTT for  
22 30 min at 37°C, and alkylated (400 mM DTT as storage) by addition of 20 mM  
23 iodoacetamide at 37 °C for 30 min in the dark. The buffer was changed into 100  
24 mM TEAB with 2 M urea by filter. Trypsin digestion was performed at 37 °C in  
25 a thermomixer for 16 h. Collected peptides flowed through the filter, desalted  
26 by C18 tips. The eluted peptides were collected for LC-MS/MS analysis.

27

#### 28 **LC-MS/MS and data analysis**

29 Samples were analyzed by LC-MS/MS on Q Exactive-plus series Orbitrap



1 mass spectrometers (Thermo Fisher Scientific) coupled with EasyNano-LC.  
2 Mobile phase A was 0.1% FA in H<sub>2</sub>O, and mobile phase B was 0.1% FA in 80%  
3 ACN. The flow rate was 3  $\mu$ L/min for loading and 0.3  $\mu$ L/min for eluting. Labeled  
4 peptide were loaded onto a 100  $\mu$ m fused silica column packed with  
5 14 cm  $\times$  3  $\mu$ m C18 resin. Peptides were eluted using a 85 min gradient (0 min 5  
6 % B; 15 min 5 % B; 20 min 10 % B; 65 min 40 % B; 65.1 min 95 % B; 75 min  
7 95 % B; 75.2 min 5 % B and 85 min 5 % B) with a flow rate of 300 nL/min. Under  
8 the positive-ion mode, full-scan mass spectra were acquired over the m/z range  
9 from 350 to 1800 using the Orbitrap mass analyzer with mass resolution of  
10 70,000. MS/MS fragmentation is performed in a data-dependent mode. The  
11 TOP 20 most intense ions are selected for MS2 analysis a resolution of 17,500  
12 using collision mode of HCD. Other important parameters: isolation window,  
13 2.5 m/z units; default charge, 2+; normalized collision energy, 28%; maximum  
14 IT, 50 ms; and dynamic exclusion, 18.0 s.

15 For rdTOP-ABPP, LC-MS/MS data was analyzed by ProLuCID with static  
16 modification of cysteine carbamidomethylation (+57.0215 Da). Additional  
17 modifications include N-terminus dimethyl labeling and lysine residue dimethyl  
18 labeling (+28.03130 Da (light) and + 34.06312 Da (heavy)) and variable IAYne  
19 probe modification of cysteine (+223.16846 Da) and oxidation of methionine  
20 (+15.9949 Da). The ratios were quantified by the CIMAGE 2.0 software as  
21 described previously. For the identification of cisplatin adducted peptides, LC-  
22 MS/MS data was analyzed by pLINK. Additional linker modifications include  
23 Cisplatin (+227.01 Da), Cisplatin-H<sub>2</sub>O(+245.02 Da) and Cisplatin-2H<sub>2</sub>O  
24 (+263.03 Da) between the  $\alpha$ -site cysteine and the  $\beta$ -site cysteine.

25

## 26 **Purification of target proteins with 6xHis tags from E.coli.**

27 Full-length complementary DNA of GLRX1, TXNDC17 and MetAP1 were  
28 cloned from the cDNA of Hela cells by PCR, and then subcloned into pet28a  
29 (+) plasmid containing 6xHis tag on C-terminal sides. All site-specific mutants  
30 were generated using the PCR mutagenesis method and verified by

1 sequencing. All plasmids were transferred into *E. coli* BL21 (DE3) cells. The  
2 cells were cultured in LB media (containing 5 g yeast extract, 10 g NaCl and 10  
3 g tryptone per 1L) at 37°C until OD at 600 nm reached between 0.6 and 1.5.  
4 The protein overexpression was induced by the addition of IPTG to a final  
5 concentration of 0.5 mM. After IPTG induction at 18°C for 20 hours, bacterial  
6 cells were collected by centrifuging at 4000 rpm for 30 min, and frozen at -80°C  
7 until further use. The GLRX1-overexpressing bacteria were resuspended in  
8 PBS with 1 mM PMSF and 10 mM imidazole. The TXNDC17-overexpressing  
9 bacteria were resuspended in the buffer containing 20 mM Hepes, pH 7.2, 500  
10 mM NaCl, 1 mM PMSF. The MetAP1-overexpressing bacteria were  
11 resuspended in the buffer containing 25 mM Tris, pH 8.0, 500 mM NaCl, 1 mM  
12 PMSF. The bacteria cells were lysed by sonication. The supernatant was  
13 collected after centrifugation at 12,000g for 30 mins and loaded on Ni-chelating  
14 column (GE Healthcare, USA). The target proteins were eluted by imidazole  
15 gradient at a concentration of 10 – 500 mM. GLRX1, TXNDC17 and MetAP1  
16 were subjected to a final purification step by size-exclusion chromatography  
17 (Superdex200 Increase 10/300 GL, GE Healthcare) in PBS, pH 7.4; 20 mM  
18 HEPES, 150 mM NaCl pH7.2 and 25 mM Tris, 150 mM NaCl, pH 8.0  
19 respectively.

20

## 21 **In-gel fluorescence analysis for purified proteins**

22 The concentration of GLRX1, TXNDC17 and MetAP1 were detected  
23 through the BCA protein assay Kit (Pierce) on a microplate reader (Bio-Rad)  
24 and quantified to 0.1 mg/mL. For GLRX1 and TXNDC17, 100  $\mu$ M TCEP was  
25 added and incubated for 30 min in advance. All three proteins were incubated  
26 by 300  $\mu$ M cisplatin for 1 h and labeled by the IAYne probe (100  $\mu$ M) for 1 h at  
27 25°C. The labeled lysates reacted with 110  $\mu$ M rhodamine-N<sub>3</sub> in the existence  
28 of 1 mM TCEP, 100  $\mu$ M TBTA, and 1 mM CuSO<sub>4</sub> at room temperature with  
29 constant shaking on a thermomixer for 1 h. After reaction, samples were

1 separated by 10% SDS-PAGE. The image of rhodamine fluorescence was  
2 imaged by ChemiDoc MP (Bio-rad) imaging system. The gels were stained by  
3 Coomassie staining (CBB) as loading control.

4

#### 5 **Inductively coupled plasma mass spectrometry (ICP-MS)**

6 200  $\mu$ L nitric acid (MOS level) and 20  $\mu$ L hydrogen peroxide (MOS level)  
7 were added to each protein sample and incubated at 70°C for 1-5h. Then the  
8 samples were diluted with ddH<sub>2</sub>O into 5 mL and the metal contents were  
9 analyzed by ICP-MS using an Elan DRC-e (PerkinElmer) spectrometer. The  
10 protein concentrations were determined by Nanodrop.

11

#### 12 **Measurement of the activity of purified MetAP1**

13 Methionine aminopeptidase activity was evaluated by quantifying the  
14 release of Met from the heptapeptide MAHAIHY (GenScript) as adapted from  
15 (Weiss et al. 2022). Reactions were conducted at 25°C in 25 mM HEPES pH  
16 7.4, 150 mM NaCl, 2 mM TCEP and consisted of 200 nM human METAP1 with  
17 2 molar equivalents of Zn. Reactions were initiated with the addition of 750  $\mu$ M  
18 of MAHAIHY peptide into 100  $\mu$ L proteins with or without varying concentration  
19 of cisplatin. The reaction was quenched with the addition of 20  $\mu$ L glacial acetic  
20 acid after 120 s. 120  $\mu$ L of 4% w/v ninhydrin (Sigma-Aldrich) in 100% ACN was  
21 added to each quenched reaction and incubated at 37°C for 15 min to detect  
22 free Met. The absorbance at 570 nm was measured and the cleaved Met  
23 concentration was determined from a standard curve of 10-750  $\mu$ M Met. All data  
24 are reported as the average of triplicate measurements from each evaluated  
25 experimental condition.

26

#### 27 **Measurement of the activity of MetAP1 in living cells**

28 The wild-type MCF-7 cell lines and MetAP1 knockout (KO) cell lines were  
29 treated by Bengamide B (0.1  $\mu$ M, Santa cruz) or cisplatin (5  $\mu$ M) for 24 h. They

1 were collected, suspended in PBS with 0.1% Triton X-100 and sonicated on  
2 ice. Protein concentration was detected through the BCA protein assay Kit on  
3 a microplate reader and quantified to 2 mg/mL. The abundance of MetAP1  
4 (Abcam),  $\beta$ -actin (Abcam), the total 14-3-3 $\gamma$  (Abcam), and the N-terminal  
5 initiator methionine unprocessed form of 14-3-3 $\gamma$  (Novus) were shown by  
6 immunoblotting (IB) with specific antibodies. The band intensities were  
7 quantified by ImageJ and the levels of iMet 14-3-3 $\gamma$  were normalized to the total  
8 14-3-3 $\gamma$ .  $\beta$ -actin was used as loading controls. Bengamide B is a commonly  
9 used inhibitor for MetAP1 and MetAP2.
