# Supplementary material for: Discovery of cisplatin-binding proteins by competitive cysteinome profiling
Source: Royal Society of Chemistry journal article supplement (doi:10.1039/d3cb00042g), 2023-01-01
Supplement: d3cb00042g2.xlsx [file d3cb00042g2.xlsx]

## Sheet: summary
Supplementary Table
List of cisplatin-binding sites identified by rdTOP-ABPP
Tab Name	Description
All sites	All sites identified and quantified by rdTOP-ABPP in three replicates
Target sites	Target sites of cisplatin that met the cutoff of -log10(p value) x log2(ratio) >1.5
NOTE
*	Site modified by IAyne

## Sheet: All sites
rep-1				rep-2				rep-3
sequence	Uniprot ID	Ratio(Control/Cisplatin)		sequence	Uniprot ID	Ratio(Control/Cisplatin)		sequence	Uniprot ID	Ratio(Control/Cisplatin)
K.C*LELFSELAEDKENYKK.F	P08238	15		K.DKEGYTSFWNDC*ISSGLR.G	Q9H4A5	15		K.QISAEKQYKGIIDC*VVR.I	P12235	15
K.C*LELVEHFGPNELRK.V	Q969Z0	15		R.MHSVGIC*GSDVHYWEYGR.I	Q00796	15		R.WDYLTQVEKEC*K.E	Q9HB71	15
K.C*LELFTELAEDKENYKK.F	P07900	15		K.KASGQPAGPDNKENC*PVPGKPGEAVAAR.K	P04183	15		K.ECPTC*RKKLVSKR.S	Q06587	15
K.VVVFIKPTC*PYC*R.R	P35754	15		K.QYKGIVDC*IVR.I	P12236	15		K.ECPTC*RKKLVSKR.S	Q99496	15
K.TAFQEALDAAGDKLVVVDFSATWC*GPCK.M	P10599	15		K.DAGGKSWC*PDC*VQAEPVVR.E	Q9BRA2	15		K.VVVFIKPTC*PYC*R.R	P35754	15
R.FITVC*DYTNPC*TK.S	Q99836	15		K.C*LELFSELAEDKENYKK.F	P08238	15		R.VLQNMEQC*QK.K	Q96ER3	15
K.EDSKVIPTEC*AIK.V	O14730	15		K.C*LELFTELAEDKENYKK.F	P07900	15		R.HYAHTDC*PGHADYVK.N	P49411	15
K.QYKGIVDC*IVR.I	P12236	15		R.KRRYHFDTDGKGSIHDQKGC*PR.K	Q9GZU2	15		K.ISCIDQIWHKACFHC*EVCK.M	Q86VF7	15
K.RVPC*AYDKTALALEVGDIVK.V	P46109	15		K.C*PQIVIAFYEER.L	Q13185	15		K.ALEYSNGIFDC*QSPTSPFMGSLR.A	Q86W92	15
R.C*VELVHEEMQR.I	O00429	15		K.C*LELVEHFGPNELRK.V	Q969Z0	15		K.ALVC*MALNEQR.L	Q96C34	15
K.KPLKPC*C*ACPETK.K	Q14061	15		K.YVVLC*ESPQDKR.T	Q8TC07	15		K.AVC*MNGTEAAQLSTKSR.A	Q15831	15
K.C*AIHVLHVNKFNPHCLHR.R	Q8ND30	15		R.QELLC*AFWK.S	P48960	15		R.C*KWTEPYC*VIAAVK.I	Q17RY6	15
K.LLDIAC*WIHHKYNSDK.S	P07339	15		R.ATDSKEPPGELC*PDVLYR.T	Q9BUK6	15		K.C*AENPELLAHCFLKRK.E	Q86YR7	15
K.AGQC*VIGLQMGTNK.C	Q99439	15		R.LWDSHVC*GVSLLSHR.W	Q9Y6M0	15		K.C*AIHVLHVNKFNPHCLHR.R	Q8ND30	15
K.ALLAEIQNGC*K.R	O75864	15		R.C*HQGPIKPYQQGR.Q	P49790	15		R.CC*VLEGLIVQSRR.Q	H0YK47	15
K.CGKAFIHDSQLQEHQRIHTGEKPFKCDIC*C*K.S	Q9UK10	15		R.SKGC*DCCGEK.S	Q5UIP0	15		R.CC*VLEGLIVQSRR.Q	H0YN89	15
R.C*LEEGKLVNK.C	P51970	15		R.C*KHFELGGDKK.R	H7BZ11	15		K.MILGNKC*DVNDK.R	P61006	15
R.TEYRLIVENLSSRC*SWQDLK.D	Q08170	15		R.C*KHFELGGDKK.R	Q969Q0	15		R.QCNAAIHKKC*IDKVIAK.C	Q04759	15
R.TEYRLIVENLSSRC*SWQDLK.D	Q13247	15		K.VASGSTATAAAGPSC*ALK.A	P41134	15		K.YLSFPTLKASLTRGLQKVLAKC*LDNHRPLPTKSSQ.-	Q5VYM1	15
K.AALRDLGC*HVELR.E	Q6NXE6	15		K.AYHEQLSVAEITNAC*FEPANQMVK.C	P68366	15		K.C*LELFSELAEDKENYKK.F	P08238	15
R.DLGC*HVELR.E	Q6NXE6	15		K.AYHEQLSVAEITNAC*FEPANQMVK.C	Q71U36	15		R.LVQSPNSYFMDVKC*PGCYK.I	P42677	15
R.DQDGCLPEEVTGC*K.T	Q9BR61	15		R.SAHRDC*EDVAK.A	Q6NXE6	15		R.LVQSPNSYFMDVKC*PGCYK.I	Q71UM5	15
K.HKREEEEDDDC*PVR.K	Q8IWD4	15		K.TAFQEALDAAGDKLVVVDFSATWC*GPCK.M	P10599	15		R.C*QRGLSGR.S	P12314	15
-.MKETPLSNC*ER.R	Q06265	15		R.RDHRPPC*AQEAPR.N	Q13501	15		R.C*QRGLSGR.S	Q92637	15
R.GGAEGQPC*LPGGDWPAC*AQK.I	Q6PJG6	15		K.AAAHHYGAQC*DKPNK.E	P51970	15		K.C*VVMFVK.E	Q86U86	15
K.QYKGIIDC*VVR.I	P05141	15		R.ADAGPLC*AAC*R.M	Q5TA31	15		K.KCRKVYGMENRDMWCTAC*RWKKACQR.F	Q6ZNC4	15
K.QYKGIIDC*VVR.I	P12235	15		K.AGAAAGGPGVSGVCVC*K.S	Q16270	15		K.WREEQRKEC*YAK.D	Q2TAC6	15
R.HC*QLEPDHEGVPEETDDFGEFR.M	Q9Y5L0	15		R.AGQAGLPC*DYTANSK.G	P07199	15		K.ESC*CPVSSNTVK.I	Q96RD9	15
R.TKLC*DLERANQTLK.D	Q676U5	15		K.AGSSC*QGPGPR.S	Q9P219	15		R.LLKFPLGPC*PR.Y	P11117	15
R.LC*TNPKPSHGGK.F	Q8TE57	15		K.ALIPC*KR.L	Q9UM22	15		K.GIHFC*HDLVSLC*NFHNYDNLR.H	O94925	15
K.IKLNDEDLSEC*LHQIQK.N	O60494	15		R.RATGNLSASC*GSALR.A	Q96T51	15		K.QIAADKQYKGIVDC*IVR.I	P12236	15
K.MEPLNNVC*AK.K	Q96S66	15		K.IVHAFDMEDLGDKAVYC*R.C	Q9NZ45	15		K.HC*QAGAPADVACSVR.R	Q5T6C5	15
-.MVTPC*PTSPSSPAARAGRRDNDQNLRAPVKK.S	P22674	15		K.C*DTQSNC*WEKDITSFK.E	Q6P3X3	15		R.HISPTAPDTLGC*YPFYK.T	P49005	15
K.KNLDSTTVAVHGEEIYC*K.S	P21291	15		K.C*GSGPVHISGQHLVAVEEDAESEDEEEEDVKLLSISGK.R	P06748	15		R.HPVLC*QSLLPILVQHITGPVRPR.H	Q9BQG0	15
R.PGPAAGC*VR.G	Q9BXM7	15		K.C*KEIAEELFTR.S	Q01433	15		R.AYQCVVLLQGKNPDITKAWKLIC*DVSR.Q	P54136	15
K.QC*QETEITTK.N	Q96SW2	15		R.C*KWTEPYCVIAAVK.I	Q17RY6	15		K.LLDC*GNELLQQR.N	P54132	15
K.SWC*PDCVQAEPVVR.E	Q9BRA2	15		R.C*LEEGKLVNK.C	P51970	15		K.LLDIAC*WIHHK.Y	P07339	15
K.TC*IRAHQRVK.F	O15164	15		R.LVQSPNSYFMDVKCPGC*YK.I	P42677	15		R.RLSLLC*R.R	O60423	15
R.TLSC*GHVFCHDCLVK.Y	A6NCQ9	15		R.LVQSPNSYFMDVKCPGC*YK.I	Q71UM5	15		R.RLWC*NNVNGVHK.G	Q9P2N4	15
R.VC*IQRKPLRFCAER.L	P18074	15		K.C*RDPTLGVVHR.G	Q9H4F8	15		K.MGIEQNMC*EVNR.S	Q13315	15
R.VFVVGTEAEAC*R.E	Q9H7N4	15		R.C*SLHSASPASVR.S	Q9P206	15		R.NLVSPAYC*TQESREEIPGGEAR.T	Q9NUQ3	15
K.VNQC*VIGTAQANRK.-	Q9BW19	15		R.C*STGSPSKDVTK.S	Q5SW79	15		R.NQHIPQYC*GSCWAHASTSAMADR.I	Q9UBR2	15
K.LLDIAC*WIHHK.Y	P07339	14.99		R.C*TLSDDCIPLTWR.C	Q9NPF0	15		K.PAIKYTRPTHLSC*VKR.K	P11137	15
K.ALIPC*KR.L	Q9UM22	14.86		R.EMGLLTFRDIAIEFSLEEWQC*LDC*AQR.N	Q96JC4	15		K.QC*SAGC*AAMERPKPEEK.R	Q17RY6	15
K.QIC*SC*DGLTIWEER.G	O14618	13.81		R.DLAALEQQC*DEHR.R	Q9UKD1	15		K.QFLDFGSSNAC*EK.T	Q15119	15
R.GC*PIGTGGVLSSQIK.V	Q96LB3	13.67		K.MATLTSGGEKPNKDLESC*SDDDNQGSK.S	Q5T3I0	15		K.QLC*QKLYSSKDTTK.R	Q9BQ51	15
R.NMVHPNVIC*DGC*NGPVVGTR.Y	Q13501	12.94		R.DTDSDTQDANDSSC*K.S	Q9Y2H0	15		K.EPNEEQSLRSNNIAELSPGAINSC*R.S	Q9Y2I9	15
K.GC*C*SQTDGLNSK.F	Q13315	12.24		R.EANVAC*LDLGFQQGADTQR.R	P05156	15		K.DAGGKSWC*PDCVQAEPVVR.E	Q9BRA2	15
K.TASDC*GAVK.H	P07602	11.65		R.EFHGLGDC*IIK.I	P12235	15		K.SWC*PDCVQAEPVVR.E	Q9BRA2	15
R.ALSC*LGPTHMGPLALGILK.L	Q6PJG6	10.8		K.ELC*GLPPIASLK.Q	Q15111	15		K.TC*SVCTKVPK.D	Q6ZT12	15
R.PFC*IEPTNIVNVNHVIQR.V	Q8NBW4	10.42		R.ELTAC*IFPTESEARALAK.E	O75030	15		K.TLGSGAC*GEVK.L	O96017	15
K.NC*TCGLAEELEKEK.S	Q6FI81	9.96		R.GASC*QGC*PNQR.L	P53384	15		R.VC*ETDGC*SSEAK.L	P53582	15
R.FSC*IIGPNGSGK.S	Q9NTJ3	9.25		R.SKGDC*QTLSEGSPGSSQSGSR.H	O94972	15		R.VLDC*GAAPGAWSQVAVQK.V	Q9UI43	15
R.FNWNHC*GEMAPAC*K.R	P15328	9.17		R.TGRSIRGFC*LPPHCSRGERR.A	P12277	15		R.VYVLITSC*DPLR.I	A6NNM8	15
R.GSAVWC*QNVK.T	P07602	8.75		R.GGGYNPLSGEGGGAC*SWRPGR.R	Q9BQE4	15		R.VYVLITSC*DPLR.I	H3BSA7	15
R.HGHHGPGAQC*AHK.A	Q8TCJ2	8.55		K.QITADKQYKGIIDC*VVR.I	P05141	15		R.WTPAAADIC*FTK.E	Q16635	15
K.AAAHHYGAQC*DKPNK.E	P51970	8.46		K.QYKGIIDC*VVR.I	P05141	15		K.GGSC*SQAASSNSAQGSDESLIAC*KA.-	P30504	14.21
R.EQSC*ELSTC*R.Q	Q6P2H3	8.44		K.QYKGIIDC*VVR.I	P12235	15		K.GGSC*SQAASSNSAQGSDESLIAC*KA.-	P30510	14.21
R.GTPC*ERPVR.V	P49585	8.23		R.HC*C*GVAQMR.E	O00170	15		K.GGSC*SQAASSNSAQGSDESLIAC*KA.-	Q07000	14.21
R.ILLAGC*PSYDK.L	Q9Y223	8.18		K.IC*EPGYSPTYK.Q	P07858	15		K.GGSC*SQAASSNSAQGSDESLIAC*KA.-	Q29865	14.21
R.MLSAVSQQVQC*IQEALR.E	Q14204	8.05		K.IC*EPGYSPTYKQDK.H	P07858	15		K.GGSC*SQAASSNSAQGSDESLIAC*KA.-	Q29960	14.21
K.MC*LWSTDAISKDVFNK.S	Q7L3B6	7.93		R.TKLC*DLERANQTLK.D	Q676U5	15		K.GGSC*SQAASSNSAQGSDESLIAC*KA.-	Q29963	14.21
K.LASTFHSTSC*LR.N	Q9NZ09	7.45		K.LDQNIIPENLPAPTDKC*K.L	Q9BXY5	15		K.GGSC*SQAASSNSAQGSDESLIAC*KA.-	Q9TNN7	14.21
K.IIPTLEEGLQLPSPTATSQLPLESDAVEC*LNYQHYK.G	P61978	7.36		K.LLDIAC*WIHHK.Y	P07339	15		R.C*PQVEEAIVQSGQKK.L	Q9BVP2	12.5
R.C*TLSDDCIPLTWR.C	Q9NPF0	7.23		K.LLDIAC*WIHHKYNSDK.S	P07339	15		R.NLAVLCLGC*C*GLQNQDFAR.K	Q9BPX3	12.37
R.GC*ALQC*AILSPAFK.V	O95757	7		R.LLTYAEIDIC*PTNWKR.I	Q8N7R7	15		K.C*IYEIFSK.E	Q13569	12.08
R.GC*ALQC*AILSPAFK.V	Q92598	7		K.LQSGTHC*LWTDQLLQGSEK.G	P01033	15		K.AGQC*VIGLQMGTNK.C	Q99439	11.46
R.VCETDGC*SSEAK.L	P53582	6.51		R.MC*GASEDRK.I	Q6W2J9	15		R.RFEEC*ISQSAVK.T	O95140	11.31
R.MVESC*LGSPC*WASPQLLR.I	Q9Y4W2	6.36		-.MIVQLIC*TVC*FLAVNTFHVR.S	Q8NGS6	15		R.C*HTIMNC*TR.T	P21912	11.29
R.TQAFQVLLQPLAC*VLK.A	Q6PJG6	6.14		R.RNC*WICK.M	O14921	15		R.VCETDGC*SSEAK.L	P53582	10.66
R.LVSYLPGFC*SLVK.R	Q9H3L0	6.09		R.NSSQSSSDGSC*K.T	Q9BSF8	15		K.NC*QQGAAYK.T	Q9Y4C1	9.12
K.SWC*PDC*VQAEPVVR.E	Q9BRA2	6.05		R.PIQVSLC*R.N	Q17RG1	15		R.C*VLIFGVPSR.V	P13716	8.53
R.LLLC*EHAEK.L	Q8WUM0	6		R.RRPPSGGGDTPITPASLAGC*YSAPRR.A	P54756	15		K.GTPEQPQC*GFSNAVVQILR.L	Q86SX6	8.52
R.TELLNVC*MNAK.H	P15328	5.93		R.TPTKPSSLNNQLVSVDC*K.K	Q9NZV1	15		R.TELLNVC*MNAK.H	P15328	8.18
R.ELPGHTGYLSC*C*R.F	P62879	5.88		R.PYEC*PEC*DKRFSAASNLR.Q	Q7L3S4	15		K.LC*ALQC*AVFDK.T	Q6VMQ6	7.9
R.LVQSPNSYFMDVKC*PGCYK.I	P42677	5.77		K.QFLEC*AQNQGDIKLC*EGFNEVLK.Q	Q9Y6H1	15		R.VLNVPLC*K.E	P15328	7.8
R.LVQSPNSYFMDVKC*PGCYK.I	Q71UM5	5.77		R.SAVETQANNLIC*R.T	O75362	15		R.DLAALEQQC*DEHR.R	Q9UKD1	7.65
R.FALAC*NASDK.I	P35250	5.66		R.SLHDALC*VVK.R	P17987	15		R.C*ETSASELER.M	P41440	7.29
K.NLINPSC*MVR.R	O60518	5.57		K.SLNNPAMLQVLLQPQLC*GR.A	Q9HCJ3	15		K.IIPTLEEGLQLPSPTATSQLPLESDAVEC*LNYQHYK.G	P61978	6.94
K.NGDIC*ETSGKPK.T	E7EQZ4	5.55		K.SSC*AGLLC*R.T	Q6PJG6	15		K.AC*VVHGSDLK.D	P05023	6.9
K.NGDIC*ETSGKPK.T	Q16637	5.55		K.SSSSDC*TTESSR.T	Q5THK1	15		R.EAIHALSSSEDGGHIFC*TLESLKR.Y	Q9Y4R8	6.78
K.C*DTQSNC*WEK.D	Q6P3X3	5.52		K.DAGGKSWC*PDCVQAEPVVR.E	Q9BRA2	15		K.C*AEIDREMISSLGVSK.A	Q92878	6.58
K.LVVVDFSATWCGPC*K.M	P10599	5.49		K.SWC*PDCVQAEPVVR.E	Q9BRA2	15		K.GLEC*LVSILK.C	Q9Y6D5	6.57
R.VEC*VLAELK.G	Q9Y4W2	5.43		K.THSLEIC*IKAC*KNLAYGEEK.K	Q4VX76	15		K.GLEC*LVSILK.C	Q9Y6D6	6.57
R.VMTIPYQPMPASSPVIC*AGGQDR.C	Q15365	5.41		K.TSC*SYC*TMAK.K	Q9NS18	15		R.C*QMIC*IDQQTGQR.N	Q96EN8	6.51
K.LNEC*VDHTPK.L	P78417	5.28		R.VAC*LLERDPIPAAHSFVDLLLC*VAR.S	Q6PJG6	15		K.LPIIGVVENMSGFIC*PK.C	P53384	6.41
K.LFKPPVLVFVDC*K.L	Q5T1V6	5.27		R.VLHALLC*LHR.T	Q96E22	15		R.SQSYIPTSGC*R.A	Q9HB19	6.25
R.VAC*LLERDPIPAAHSFVDLLLCVAR.S	Q6PJG6	5.24		K.VSQFLVDGVC*TVANCVGK.E	Q8N0X7	15		K.ILPALC*HDITDWVVGTR.V	Q86Y56	6.15
K.C*ASQSGMTAYGTRR.H	Q99439	5.15		R.VVNSETPVVVDFHAQWC*GPCK.I	Q99757	15		R.QAAEC*HPPVGR.G	Q8N3U4	6.14
R.SGGSGGC*SGAGGASNC*GTGSGR.S	Q15005	5.05		R.YLECISCGSSDMSC*ER.G	Q03405	15		R.TQAFQVLLQPLAC*VLK.A	Q6PJG6	6.06
R.TPTSGQSVSTC*SSK.N	Q32NC0	5.05		R.FQMTQEVVCDEC*PNVK.L	Q9UBS4	14.71		R.GNVAGDSKNDPPMEAAGFTAQVIILNHPGQISAGYAPVLDC*HTAHIAC*K.F	P68104	5.86
K.LGIQGSYFCSQEC*FK.G	P53582	4.99		R.GRPGLC*TPQC*ASLEPGPPAPSR.G	Q2T9J0	14.22		R.AFGGPGAGC*ISEGR.A	Q9H479	5.82
K.KSEAQHEQPEDGC*PFGALTQR.L	O75528	4.99		R.RLC*AEDRDALR.Q	Q96HA7	14.04		R.SGGSGGC*SGAGGASNC*GTGSGR.S	Q15005	5.72
R.LGGEVSC*LVAGTKC*DK.V	P13804	4.9		R.GLLNAC*LR.S	O15360	13.43		K.C*MPTFQFFK.K	P10599	5.71
R.ELC*ALHALNNVFQDSNAFTR.D	Q15040	4.75		R.VRELGGC*SQAGNR.H	O95081	13.17		K.LLGPGVNYSGC*QITWAK.F	P40763	5.62
R.C*QSPWTEALWVR.L	Q6PJG6	4.63		K.VLHDAQQQC*R.D	A1L0T0	12.54		K.LGIQGSYFC*SQEC*FK.G	P53582	5.6
R.LFNC*SASLDWPR.M	Q9Y4W2	4.59		R.TPTSGQSVSTC*SSK.N	Q32NC0	12.34		K.C*LAALASLR.H	Q12906	5.55
K.DAGGKSWC*PDCVQAEPVVR.E	Q9BRA2	4.57		R.HGHHGPGAQC*AHK.A	Q8TCJ2	11.96		K.ADSINKPFAQQC*QDLVK.V	Q9NXE4	5.54
K.C*ALDFFR.Q	P51970	4.56		R.VLSEPIGPESPSSTEC*PR.A	Q56NI9	11.96		K.AAC*YAANSPR.R	Q8NHS4	5.4
K.GTPEQPQC*GFSNAVVQILR.L	Q86SX6	4.46		K.LVVVDFSATWC*GPCK.M	P10599	11.88		K.C*GTFGATSLQQR.Y	Q96MX6	5.39
R.VGLGIC*YDMR.F	Q9NQR4	4.44		R.LLAKEC*R.L	P28062	11.68		R.YEVAVPLC*K.Q	E7EVH7	5.31
K.ELQAAC*R.A	O95202	4.44		K.SFLTPC*C*SLETPVDSQLYR.Y	Q14CZ7	11.67		R.YEVAVPLC*K.Q	Q07866	5.31
R.C*HQGPIKPYQQGR.Q	P49790	4.43		R.STEC*AQEGR.I	O60318	11.4		R.YEVAVPLC*K.Q	Q9H0B6	5.31
R.THC*PYAVALPEVAPAQPLTEALR.A	Q6PJG6	4.43		K.SVSPSASPVVC*YQSNRDELR.R	Q12841	11.18		R.YEVAVPLC*K.Q	Q9NSK0	5.31
R.DLAALEQQC*DEHR.R	Q9UKD1	4.37		R.VLDC*GAAPGAWSQVAVQK.V	Q9UI43	11.13		R.C*GNIASIMVFK.D	O00743	5.3
K.KFQYQLAC*R.S	Q96SK2	4.35		R.IHQEVFSSC*HR.K	Q96IY1	10.97		R.GDLNDC*FIPC*TPK.G	P11586	5.26
K.VTFQPPSSIGC*R.K	A0MZ66	4.29		K.LTHAAPC*MLFMK.G	O76003	10.81		R.C*PEQEQR.L	Q9H211	5.24
R.VQSLPSVPLSC*AAYR.E	Q96AD5	4.18		R.NLTAGMAMITC*R.E	A5YKK6	10.41		R.AAAAC*LDK.A	Q9H3U1	5.2
K.C*PFYAAEQDKGALEGSSC*PFR.T	P30519	4.15		K.LQHINPLLPAC*LNKEESK.T	Q9BTE3	10.39		R.ATDSKEPPGELC*PDVLYR.T	Q9BUK6	5.16
K.C*ASQVGMTAPGTR.R	Q99439	4.14		K.C*YASDQEVLDMHGFLR.Q	P29590	9.8		R.QRPASLVVADFGC*GDC*R.L	O43159	5.15
R.VSQC*NLC*PTR.I	Q9NUQ6	4.12		K.EFMLC*R.W	P51970	9.35		K.GVLSGEEC*KK.Q	Q9NVI1	5.06
K.GSEEVDSHC*KK.A	Q9Y4W2	4.09		K.C*EDLETQTQSEK.Q	O00592	9.17		R.KQQNEVSSC*IPK.I	Q9NVX0	5.04
K.GVTC*ENR.E	Q9Y4W2	4.09		R.ALSC*LGPTHMGPLALGILK.L	Q6PJG6	9.1		K.GGNAVVDGC*GK.A	P48506	4.99
R.KTAGQTGMC*GGVR.G	Q5VTL8	4.08		R.NMVHPNVICDGC*NGPVVGTR.Y	Q13501	9.05		K.SSSSDC*TTESSR.T	Q5THK1	4.96
R.VLNVPLC*K.E	P15328	3.98		K.ANSEAC*R.D	Q10589	8.95		K.ASIQEC*ILPDSPLYHNK.V	Q9NXE4	4.95
K.GGSC*SQAASSNSAQGSDESLIAC*KA.-	P30504	3.93		R.GGAEGQPC*LPGGDWPAC*AQK.I	Q6PJG6	8.92		K.SC*MNQVTISTTDRR.N	O14757	4.95
K.GGSC*SQAASSNSAQGSDESLIAC*KA.-	P30510	3.93		R.KLFAPQQILQC*SPAN.-	P04183	8.9		K.EGYQLGQQSLC*K.R	Q7Z333	4.87
K.GGSC*SQAASSNSAQGSDESLIAC*KA.-	Q07000	3.93		R.GQDHC*GIESEVVAGIPR.T	P07858	8.5		R.ENPDLAC*LQSIIFDEERSPEEQAK.T	O95801	4.8
K.GGSC*SQAASSNSAQGSDESLIAC*KA.-	Q29865	3.93		R.AGLRKPESQEAAPLSGPC*GR.R	Q9Y6M0	8.49		K.TIAEC*LADELINAAK.G	P46782	4.79
K.GGSC*SQAASSNSAQGSDESLIAC*KA.-	Q29960	3.93		R.VIHC*DFFK.L	Q9H5Q4	8.15		R.AIQTVSC*LLQGPC*DAGNR.A	Q9H3U1	4.79
K.GGSC*SQAASSNSAQGSDESLIAC*KA.-	Q29963	3.93		K.AVC*MNGTEAAQLSTKSR.A	Q15831	7.98		R.KTC*TTVAFTQVNSEDKGALAK.L	P62424	4.74
K.GGSC*SQAASSNSAQGSDESLIAC*KA.-	Q9TNN7	3.93		K.KPLKPC*C*ACPETK.K	Q14061	7.72		K.C*IKDFFMK.R	Q9BVS4	4.66
K.C*ASQSGMTAYGTR.R	Q99439	3.9		R.C*KHFELGGDK.K	H7BZ11	7.68		R.ADPGVLAALC*EK.T	Q8WVB6	4.65
R.KC*SQTQCPR.K	P29590	3.88		R.C*KHFELGGDK.K	Q969Q0	7.68		K.ENFSLDWC*K.Q	P23919	4.57
K.C*KPVPLLELAEGQK.Q	Q8NHV4	3.85		K.KPLKPC*C*ACPETKK.A	Q14061	7.66		K.RSTEC*AQEGR.I	O60318	4.44
R.ATSPLVSLYPALEC*R.A	Q96G74	3.8		K.QC*SAGC*AAMERPKPEEK.R	Q17RY6	7.6		R.VAC*QASSER.N	Q96H55	4.41
K.KASGQPAGPDNKENC*PVPGKPGEAVAAR.K	P04183	3.77		K.TPGC*SDLGPLIPQFLR.E	Q6PJG6	7.57		K.GSEEVDSHC*KK.A	Q9Y4W2	4.35
R.NC*WQNYLDFHR.C	P14854	3.76		R.ALC*DVGTAISC*SR.V	E9PLN8	7.54		R.EMASC*ITQR.K	Q969E8	4.26
K.TSC*SYCTMAK.K	Q9NS18	3.74		R.ALC*DVGTAISC*SR.V	Q9BQB6	7.54		K.SC*GSSSHENRPLDLLHK.M	Q7Z6Z7	4.26
R.HMSEFMEC*NLNELVK.H	P25786	3.71		R.ELPGHTGYLSC*C*R.F	P62879	7.53		K.QCSAGC*AAMERPKPEEK.R	Q17RY6	4.21
K.QCSAGC*AAMERPKPEEK.R	Q17RY6	3.7		R.ELPGHTGYLSC*C*R.F	Q9HAV0	7.53		R.FMLYAHGPDLC*R.E	Q9NRR4	4.21
R.GSAC*SNR.S	Q5SNT2	3.67		R.SLHDALC*VLAQTVK.D	P78371	7.27		R.LC*PLVEHLPR.V	P36956	4.18
R.DHRPPC*AQEAPR.N	Q13501	3.63		R.AASQINVC*GVR.K	Q14678	7.26		K.VVVFIKPTC*PYCR.R	P35754	4.15
R.ISC*MSKPPAPNPTPPR.N	P46734	3.62		K.RSC*PFADVAPLQLK.V	O15304	7.24		K.ADGDSKGSEEVDSHC*KK.A	Q9Y4W2	4.03
R.GNMNC*GAFQAHQMR.L	Q9UPN9	3.57		R.TDLLNVC*MNAK.H	P41439	7.19		K.ETARPSC*EIVDGTR.E	Q92538	4.01
K.C*ASQVGMTAPGTRR.H	Q99439	3.56		K.LTAVCMEC*FR.E	P04183	7.18		R.MTC*HKR.Y	Q9BVP2	4.01
R.AC*VDFK.T	P55789	3.55		R.LNIISPDLSGC*TSK.G	P17813	7.11		R.ALC*DVGTAISC*SR.V	E9PLN8	4
K.SSVAC*K.W	Q7L3B6	3.55		R.DSFPNFLAC*K.Q	P17568	7.03		R.ALC*DVGTAISC*SR.V	Q9BQB6	4
R.SGGSGGC*SGAGGASNCGTGSGR.S	Q15005	3.54		R.NC*WQNYLDFHR.C	P14854	7.03		K.VVVFIKPTCPYC*R.R	P35754	3.99
R.ALC*QAC*ALLDGLNR.G	Q7Z7A3	3.54		R.SC*GHQTSASSLK.A	Q9HB90	6.99		R.SHFEC*EKETPQSLAFTR.G	Q9UDY2	3.97
R.IVDDC*GGAFTMGTIGGGIFQAIK.G	Q99595	3.53		R.GILDC*VHQSYR.A	Q8N8R3	6.9		R.LWQNALLEKPLC*PK.E	Q3KR37	3.96
R.SC*PFADVAPLQLK.V	O15304	3.52		R.QAHLC*VLASNCDEPMYVK.L	P25398	6.86		K.SC*DLLLFLR.D	Q6PJG6	3.91
R.FTDDTFC*EACK.S	Q6IQ22	3.5		K.FSVC*GSSQESDSLPNSAHDRDR.T	Q6PIW4	6.84		R.SPATPAC*R.R	Q69YH5	3.88
K.LSC*QPMLSLDDFQLQPPVTFR.L	O75607	3.47		R.TLFQAC*TDEEAAVVQSC*TR.S	Q86Y56	6.82		R.C*PLDALNTTKPK.S	P54646	3.84
R.GC*GPC*LR.I	O43396	3.46		R.NLVQC*LLEK.Q	Q7Z6M4	6.81		R.GCGPC*LR.I	O43396	3.77
K.SLC*SLNMNSTK.L	Q8IY22	3.46		K.RVPC*AYDKTALALEVGDIVK.V	P46109	6.74		R.C*IESLIAVFQK.Y	P31949	3.75
R.AFPQLGGRPGPEGEGSLESQPPPLQTQAC*PESSCLR.E	O94992	3.42		R.C*SDNTEVEVSNLENKQPVESTSAK.S	Q9NQW6	6.72		R.KGPGKQEEVC*VIDALLADIRK.G	Q27J81	3.74
R.QRQPSEGSSSREEEGPSTSC*ILESLFR.A	P43355	3.42		R.TSYTC*K.S	P15328	6.6		R.DKGSNTFQC*R.I	Q8WXH0	3.73
R.C*SVPVDQASESLLK.S	Q9NVN8	3.41		K.SWC*PDC*VQAEPVVR.E	Q9BRA2	6.57		R.YSSSFC*THDR.N	P04183	3.67
R.KLFAPQQILQC*SPAN.-	P04183	3.38		K.GGLLC*TLQGK.L	O43292	6.55		K.SESQGSGC*SR.A	Q8IVL1	3.62
R.DHC*VAHK.L	P07919	3.38		R.SGGSGGC*SGAGGASNC*GTGSGR.S	Q15005	6.54		R.RGNVAGDSKNDPPMEAAGFTAQVIILNHPGQISAGYAPVLDC*HTAHIAC*K.F	P68104	3.62
K.GCPVNTEPSGPTC*EKK.T	P53701	3.37		R.KAENKYAGGNPVC*VRPTPK.W	Q15004	6.53		R.KGDSNANSDVC*AAALR.G	Q8IZL8	3.58
K.LGTVYC*QASFPGANIIGNK.M	P04150	3.37		K.NIVHC*DLKPENVLLASADPFPQVKLCDFGFAR.I	Q9BZL6	6.53		R.MVESC*LGSPC*WASPQLLR.I	Q9Y4W2	3.57
R.KQFSVPPAPTRPSC*PAVAEIPLR.M	Q99661	3.37		R.LVSYLPGFC*SLVK.R	Q9H3L0	6.4		R.RQLC*GGNQAATER.I	Q6VN20	3.56
R.KGVHC*VMSLGVPGPATLAK.A	Q96CP2	3.35		R.C*KHFELGGDKKR.K	H7BZ11	6.3		K.ALLDGMGSC*LFER.L	Q13444	3.54
R.C*HTIMNC*TR.T	P21912	3.3		R.C*KHFELGGDKKR.K	Q969Q0	6.3		R.IVGNSGLNIYNLYAPC*AGGVPSHFR.Y	P10619	3.52
K.HVLTGSADNSC*R.L	Q13347	3.3		R.LWQNALLEKPLC*PK.E	Q3KR37	6.18		R.LRSDPDAC*PTMPLLAMLLR.G	P57678	3.5
R.C*RDDSFFGETSHNYHKFDSEYER.M	P43243	3.29		R.GTPC*ERPVR.V	P49585	6.15		R.FC*PFAER.T	P78417	3.5
K.LPIIGVVENMSGFIC*PK.C	P53384	3.29		K.NLINPSC*MVR.R	O60518	6.11		R.DHRPPC*AQEAPR.N	Q13501	3.46
K.VVVFIKPTC*PYCR.R	P35754	3.28		R.SPPPAC*ASGAGPADQLALFPQWK.S	Q8NCR0	6.06		R.QAHLC*VLASNC*DEPMYVK.L	P25398	3.46
K.SNPGNNMAC*ISK.N	O43683	3.28		K.ASGQPAGPDNKENC*PVPGKPGEAVAAR.K	P04183	6.01		R.FDPTQFQDC*IIQGLTETGTDLEAVAK.F	Q7L1Q6	3.45
R.SAHRDC*EDVAK.A	Q6NXE6	3.26		R.RC*PGGLPGHAGGAAPGR.G	Q8N726	5.93		K.RVPC*AYDK.T	P46109	3.44
R.ERC*QFTLKPISDSVGVFLR.Q	Q8NE86	3.26		K.AC*VVHGSDLK.D	P05023	5.84		K.RMTC*HKR.Y	Q9BVP2	3.44
R.TSYTC*K.S	P15328	3.24		K.SPAPGLASGDRPPSVSSVHSEGDC*NR.R	Q9Y618	5.72		K.AAVPLGGFLC*NVADK.S	Q7L8L6	3.41
R.ENTFEC*QNPR.R	Q17RY6	3.22		R.MVESC*LGSPC*WASPQLLR.I	Q9Y4W2	5.7		K.TVGVQGDC*R.S	P49915	3.39
K.C*LAQEVNIPDWIVDLR.H	Q9Y4W2	3.2		R.IC*SIYTQSGENSLVQEGSEASPIGK.S	Q9Y4W2	5.67		R.C*ALLASEVPQLALQLLQDPESYVR.A	Q6PJG6	3.32
R.SPQELDQGTGAALC*FFNPLFPGDLGPTKR.E	Q13671	3.2		R.IEC*MLLC*EGAAAVLDMVRPK.A	Q27J81	5.63		R.ENFPLC*GR.D	E7EVK2	3.32
R.ALC*DVGTAISC*SR.V	E9PLN8	3.18		K.QIAADKQYKGIVDC*IVR.I	P12236	5.6		R.GKWNPDC*LMIDGLVSQLGER.I	Q8WYP5	3.3
R.ALC*DVGTAISC*SR.V	Q9BQB6	3.18		K.GVSASAVPFTPSSPLLSC*SQEGSR.H	Q9Y2X7	5.5		K.MGVPYC*IIK.G	P62424	3.29
R.TMC*PLLSMKPGEYSYFSPR.T	Q15003	3.17		R.WTPAAADIC*FTK.E	Q16635	5.49		R.C*HAVHVALVLFELK.L	Q8N1F7	3.29
K.MLSC*AGADR.L	P27635	3.13		K.GSRPPLILQSQSLPC*SSPR.D	Q6KC79	5.47		K.LASTPFKGGTLFGGEVC*K.V	P42166	3.29
R.SLREC*ELYVQK.H	P10644	3.13		K.DALLLWC*QMK.T	O15020	5.45		R.SVSPC*SNVESR.L	Q9UQ35	3.28
R.MTC*HKR.Y	Q9BVP2	3.11		K.DALLLWC*QMK.T	P11277	5.45		R.C*SEC*IDWGEKR.N	O95807	3.27
K.QGLDKFPGEVTLLC*GIAR.I	Q8TAM2	3.1		K.DALLLWC*QMK.T	Q01082	5.45		R.NADC*SSGPGQR.V	Q9BSD7	3.23
R.VDGMDILC*VR.E	P08559	3.1		K.DALLLWC*QMK.T	Q9H254	5.45		R.ELGGC*SQAGNR.H	O95081	3.17
K.LTC*FELAPK.S	Q16666	3.08		R.KRC*PSQSSSRPAAMISQPPTPPTGQPVREDAK.W	Q6PKG0	5.43		R.IKDEFQLLQAQYHSLKLEC*DKLASEK.S	Q08117	3.17
R.AC*STVEGK.W	Q96RL1	3.07		R.DQDGCLPEEVTGC*K.T	Q9BR61	5.4		R.SDPDAC*PTMPLLAMLLR.G	P57678	3.17
R.YSSSFC*THDR.N	P04183	3.07		K.SIPLEC*PLSSPK.G	Q92667	5.38		K.AIALFTPDAC*GLSDPAHVESLQEK.A	P10588	3.16
R.C*AGESC*WNAAIALALIDFQNRR.A	Q53GA4	3.04		R.KAC*PLQPDHTNDEKE.-	Q15004	5.37		R.QKQYNC*LTQR.I	Q9Y3A2	3.16
R.LSQTPHSQPPRPGTC*K.T	Q9UER7	3.04		K.ALLPLPEASYLPSC*QLNR.R	Q2NKJ3	5.36		K.ANFIEADKYFLPFELAC*QSK.S	Q9Y6D5	3.16
K.GGLLC*TLQGK.L	O43292	3.02		R.VVNSETPVVVDFHAQWC*GPC*K.I	Q99757	5.33		K.SNSLIHTEC*LSQVQR.I	O43929	3.15
K.AHQSYC*HSNK.H	Q96S59	3.01		R.SLTLLPHGTPNSASPC*SQR.H	Q9BXB5	5.32		R.SLDQTSPC*PLVLVR.I	Q6XZF7	3.12
R.EC*AC*AGLAR.L	Q7Z4Q2	3.01		R.ENTFEC*QNPR.R	Q17RY6	5.31		K.C*VAGKDLPEGAVK.G	Q92616	3.11
K.VC*NHENQK.V	Q9NSV4	3.01		K.EANTLNLAPYDAC*WNAC*R.G	Q9NR50	5.3		R.ALSC*LGPTHMGPLALGILK.L	Q6PJG6	3.11
R.VPC*AYDK.T	P46109	2.95		K.GPTC*QYR.A	Q13444	5.27		K.LVSPLC*LAPYFR.L	Q9BXW9	3.07
R.MDILDVLTLAAQELSRPGC*LGR.T	Q9Y4R8	2.94		K.GTPEQPQC*GFSNAVVQILR.L	Q86SX6	5.26		K.KYVSVC*EGPLKEQEWNTTNAK.Q	A6NDU8	3.06
R.RC*GAQDKEHPR.Y	Q96GX9	2.93		K.C*RQPAPPTSQPPR.A	Q9BUT9	5.22		R.SSESELC*IETPKLTTSEEK.G	Q7Z6Z7	3.05
K.GC*GGGTHSSDRNQAK.A	Q96NL8	2.93		R.THC*PYAVALPEVAPAQPLTEALR.A	Q6PJG6	5.21		R.TGSEMLQELLGFSPLKPLC*R.V	Q86U38	3.03
R.GQDHC*GIESEVVAGIPR.T	P07858	2.92		R.C*IQMWFDPAQGNPNEEVAR.F	P15328	5.2		K.GGLLC*TLQGK.L	O43292	3.03
R.C*IQMWFDPAQGNPNEEVAR.F	P15328	2.91		R.QGHIC*R.L	Q5JPH6	5.18		K.QYYIGDIHPSDLKPESGSKDPSKNDTC*K.S	O43169	3.03
K.ASGQPAGPDNKENC*PVPGKPGEAVAAR.K	P04183	2.91		K.C*MPTFQFFKK.G	P10599	5.15		K.NGSTAGNSPHC*R.K	Q8TBM8	3.03
R.VVNSETPVVVDFHAQWC*GPC*K.I	Q99757	2.91		R.RQLC*GGNQAATER.I	Q6VN20	5.09		K.ATDQYC*AR.L	Q8WTW3	3.02
K.SSSQPSSC*CSDPSKPGGNVEGATQSLAEQMR.K	Q13501	2.9		K.CAGC*TNPISGLGGTK.Y	Q14192	5.08		K.SSIINSLKQEQMC*NVGVSMGLTR.S	Q9BVP2	3.01
K.DGSKPLLC*HYMMPDEETPLAVQAC*GLSPR.D	P56589	2.89		K.SSQAEAC*SESR.N	Q9NZJ0	5.07		R.KGPGKQEEVC*VIDALLADIR.K	Q27J81	3
R.TIESYC*QDVLR.R	Q9NVN8	2.89		R.GGC*PGGEATLSQPPPR.G	P20290	5.05		R.SGGSGGC*SGAGGASNCGTGSGR.S	Q15005	2.99
K.LVVVDFSATWC*GPCK.M	P10599	2.88		K.QC*SAGCAAMERPKPEEK.R	Q17RY6	5.02		K.SC*SGVEFSTSGHAYTDTGK.A	Q9Y277	2.99
K.RPQYC*SETQSK.K	Q86TC9	2.84		R.LIGPNC*PGVINPGEC*K.I	P53597	5.01		R.NTGIIC*TIGPASR.S	P14618	2.99
K.RVC*EEIAIIPSK.K	P0CW22	2.83		R.VC*IQRKPLRFCAER.L	P18074	4.96		R.IC*NLTEEESSK.S	Q70CQ2	2.98
R.ASYFQC*VQR.E	P30281	2.81		R.AESSQTC*HSEQGDKK.M	P46063	4.89		K.GVLFGVPGAFTPGC*SK.T	P30044	2.97
R.RLQGQC*R.Q	Q86SX3	2.81		K.LTNVPAC*VLITPGDSK.A	Q96HE9	4.88		K.SGIQPLC*PER.S	P42166	2.97
R.C*IPEIDDSEFCIR.I	Q969U7	2.8		K.QCSAGC*AAMERPKPEEK.R	Q17RY6	4.86		K.SEMVPSC*PFIYIIR.K	Q9BW27	2.97
R.C*SDAAGYPHATHDLEGPPLDAYSIQGQHTISPLDLAK.L	Q15365	2.79		K.IIPTLEEGLQLPSPTATSQLPLESDAVEC*LNYQHYK.G	P61978	4.84		K.C*HVILGNLRK.N	Q9H8P0	2.96
R.LKESGHGNSVC*PVTSNYHSSQR.S	Q9HC62	2.79		R.NADC*SSGPGQR.V	Q9BSD7	4.8		K.VLC*QLDEEEVLHSPR.L	Q9BXL6	2.96
K.RKGVHC*VMSLGVPGPATLAK.A	Q96CP2	2.77		R.VC*VIDEIGK.M	Q9BSD7	4.79		R.AQIEQVIANC*EHK.N	Q92621	2.94
R.C*ALSSPSLAFTPPIK.T	Q8NFH5	2.74		R.C*QSPWTEALWVR.L	Q6PJG6	4.72		K.YFHGFVAMC*R.Q	Q9HCK8	2.94
R.SVVC*QESDLPDELLYGR.A	Q9NS86	2.74		K.C*AAQTLEKR.G	O75152	4.7		K.SILPFEAVVC*MYR.F	Q8IZV5	2.93
R.LYYFQYPC*YQEGLR.S	Q9NRW3	2.73		R.LSQTPHSQPPRPGTC*K.T	Q9UER7	4.65		K.C*GGVEQASSSPR.S	Q5VZL5	2.92
K.VGILDVDLC*GPSIPR.M	Q9Y5Y2	2.71		R.IWLEPC*IR.G	Q86UV5	4.65		R.HTAC*NEQQR.T	Q5T4S7	2.92
R.SIGEPDSLYGC*GGGK.M	Q13315	2.71		K.AAAQC*YIDLIIK.E	P53618	4.64		K.SHVYSLEGQDC*K.Y	Q9NXE4	2.92
K.GQLC*DLNAELKR.C	Q9BW19	2.7		R.LC*DSLTSFSQNATLYLNR.T	P57678	4.63		R.C*EFDSQASAPR.A	O43542	2.91
R.C*SNHLQDK.I	Q9UHR5	2.69		R.GKYDC*GHVQK.K	O15235	4.61		K.KEVHLGAC*GALK.N	O60716	2.91
K.SLLNQC*IEER.Y	Q96GM8	2.69		R.TQADELPAC*LLSAAR.L	P10398	4.6		K.FLC*YLSQAGFR.V	Q7Z2T5	2.91
K.QAC*MLIR.N	Q6NXE6	2.68		R.QKELAC*LR.G	Q9NQW6	4.53		R.LILC*C*NSTSK.V	P40938	2.91
K.TPGC*SDLGPLIPQFLR.E	Q6PJG6	2.67		R.SPQELDQGTGAALC*FFNPLFPGDLGPTKR.E	Q13671	4.53		K.AFQYVETHGEVC*PANWTPDSPTIKPSPAASK.E	P30048	2.9
K.GC*SNKPTTVNKR.S	Q8NHV4	2.66		R.KPESQEAAPLSGPC*GR.R	Q9Y6M0	4.53		R.HGFC*GIPITDTGR.M	P12268	2.9
R.AYSPLHGGSGSYSVC*SNSDTK.T	Q96BY9	2.65		K.LPIIGVVENMSGFIC*PK.C	P53384	4.52		K.YYTPVPC*ESATAK.A	P51692	2.9
R.GGFSFENC*QR.N	P40306	2.65		R.VCETDGC*SSEAK.L	P53582	4.51		R.EKSGIQPLC*PER.S	P42166	2.9
R.RLPATHC*FQHLLR.V	Q13671	2.63		R.SGGSGGC*SGAGGASNCGTGSGR.S	Q15005	4.5		K.SLIDNFALNPDILC*SAK.R	Q5UIP0	2.88
K.VSSC*EQR.L	Q8WX93	2.63		K.KGVLFGVPGAFTPGC*SK.T	P30044	4.5		K.KQINVC*SQLDWKR.S	P52948	2.87
R.C*GAQDKEHPR.Y	Q96GX9	2.63		R.HLFC*LYVVSK.Y	P50416	4.47		R.IALC*IDGPK.R	Q14CZ7	2.86
R.IHQEVFSSC*HR.K	Q96IY1	2.62		K.AC*PLQPDHTNDEKE.-	Q15004	4.47		K.AIVLFTSDAC*GLSDVAHVESLQEK.S	P24468	2.85
R.SLPGPAPC*LK.H	Q01433	2.61		R.SQSYIPTSGC*R.A	Q9HB19	4.46		R.LAVLMEAQC*R.Q	Q9Y4R8	2.85
K.TGVHHYSGNNIELGTAC*GK.Y	P62888	2.6		K.DGSKPLLC*HYMMPDEETPLAVQAC*GLSPR.D	P56589	4.43		R.VEC*VLAELK.G	Q9Y4W2	2.85
R.C*NLAC*TPPR.H	P46379	2.6		R.GRC*DETAAAK.T	Q8NCN4	4.42		R.VLDALFPC*VQGGTTAIPGAFGC*GK.T	P38606	2.84
R.KITSNC*TIGLR.G	Q9UPT9	2.59		R.AYSPLHGGSGSYSVC*SNSDTK.T	Q96BY9	4.42		K.YMAC*C*LLYR.G	P68366	2.84
R.C*SLADFQIEK.K	Q9HC98	2.59		K.SQAAPGSSPC*R.G	Q8N556	4.41		K.YMAC*C*LLYR.G	Q71U36	2.84
R.RQLC*GGNQAATER.I	Q6VN20	2.58		K.YAGGNPVC*VRPTPK.W	Q15004	4.41		R.QPSEGSSSREEEGPSTSC*ILESLFR.A	P43355	2.84
R.C*LGPPTTPGPYR.S	P29372	2.58		R.SDLYSSC*DR.V	Q96E39	4.36		R.RLEMTGVC*ASQMALTLLGGPNR.L	Q96F86	2.84
R.C*LSEQSVAISR.C	P41134	2.58		K.VAHALAEGLGVIAC*IGEK.L	P60174	4.36		K.ILAAALTEC*HR.K	P46060	2.83
R.FAGQMAALC*SR.D	Q9NXE4	2.56		R.GSC*YPATGDLLVGR.A	P55268	4.33		K.GWNEC*EQTVALLSLLKR.V	Q5PRF9	2.82
R.EAC*EHSGEAK.A	Q9BWG4	2.56		K.C*ASQSGMTAYGTR.R	Q99439	4.32		K.GWNEC*EQTVALLSLLKR.V	Q9UPU9	2.82
K.EWKHFLSDTGMAC*R.S	Q5TFE4	2.54		K.KIC*SHSAPEQQAR.T	O75683	4.31		R.KPESQEAAPLSGPC*GR.R	Q9Y6M0	2.82
K.VLC*QLDEEEVLHSPR.L	Q9BXL6	2.54		K.KKLTGIKHELQANC*YEEVKDR.C	P23528	4.3		K.GVTC*ENR.E	Q9Y4W2	2.82
K.AEAEKDGVKVPTTLAEYC*IK.T	Q712K3	2.53		R.LC*SSSSSDTSSR.S	Q86WB0	4.3		K.EGTALVPYGLPC*IR.E	Q92538	2.81
R.QLWPDC*VR.G	Q9BX79	2.52		R.VMTIPYQPMPASSPVIC*AGGQDR.C	Q15365	4.22		R.VAEHHVATLSGHSQEVC*GLR.W	Q12834	2.81
R.MAGIFDVNTC*YGSPQSPQLIR.R	Q9BTX1	2.51		R.TELLNVC*MNAK.H	P15328	4.22		K.C*IQSILKEEGEHIR.E	Q99567	2.8
R.GASC*QGCPNQR.L	P53384	2.51		K.SKADSC*SQAAGTK.G	Q9H7N4	4.21		R.GQC*MSGASR.L	Q9ULX6	2.8
R.GASCQGC*PNQR.L	P53384	2.51		R.YSSSFC*THDR.N	P04183	4.15		K.TDSPSC*EYSR.F	Q9HAV4	2.8
K.AGKPPC*GATKR.S	Q9BY42	2.5		R.ATSPLVSLYPALEC*R.A	Q96G74	4.08		R.RAPTC*SLDGALPLGAQIPAVHR.L	Q9Y613	2.79
R.KAENKYAGGNPVC*VRPTPK.W	Q15004	2.48		K.GVGC*LYEK.E	Q76FK4	4.07		K.LFDDC*TQQYK.A	Q14738	2.78
K.QFLDFGSSNAC*EK.T	Q15119	2.48		R.ERLELC*DER.V	P07919	4.06		K.SGEEDFESLASQFSDC*SSAK.A	Q13526	2.77
R.HGKYMAC*C*LLYR.G	P68366	2.47		R.SQSC*SDTAQER.A	Q8NCN4	4.03		K.ALFLLPC*ISR.R	Q658P3	2.77
R.HGKYMAC*C*LLYR.G	Q71U36	2.47		K.C*ASQVGMTAPGTR.R	Q99439	4		R.FVYTPAMESVC*GYFHR.S	P01033	2.77
R.NMVHPNVICDGC*NGPVVGTR.Y	Q13501	2.47		K.TGAAYPC*FC*SPQR.L	Q5JPH6	4		R.NLNDQVLFIDQGNRPLFEDMTDSDC*RDNAPR.T	Q14116	2.77
R.STGILGVC*K.I	Q86XI2	2.47		R.ASTASPC*NNNINAATAVALQEPR.K	Q71RC2	3.99		R.ALEFGEPVLLVGDTGC*GK.T	Q9NU22	2.76
R.TASISSSPSEGTPTVGSYGC*TPQSLPK.F	Q6PKG0	2.47		R.ASYFQC*VQR.E	P30281	3.95		K.LC*IYTDHAVSPR.Q	P30281	2.75
K.QC*SAGCAAMERPKPEEK.R	Q17RY6	2.45		R.C*HTIMNC*TR.T	P21912	3.94		-.MSNVRVSNGSPSLERMDARQAEHPKPSAC*R.N	P46527	2.75
K.SGEEDFESLASQFSDC*SSAK.A	Q13526	2.44		K.DTC*YSPKPSVYLSTPSSASK.A	Q9Y5K6	3.94		K.LSC*QPMLSLDDFQLQPPVTFR.L	O75607	2.74
R.KALLMC*EAC*R.V	P40938	2.44		R.LGPGC*GMMAGGK.K	Q96EB1	3.93		K.QLPDC*IVGEDGLILTPLGR.Y	Q9NXE4	2.74
R.VLGLGLGC*LR.L	Q9BRJ7	2.44		R.LIAGC*IGKPLGEQFRK.E	Q9HAV4	3.93		R.IC*SIYTQSGENSLVQEGSEASPIGK.S	Q9Y4W2	2.73
R.KPSGSGDQSKPNC*TK.D	Q8TBM8	2.43		R.LKSESQGSGC*SR.A	Q8IVL1	3.93		K.LTTFAANLLTLSC*R.I	Q13535	2.73
R.RC*PGESLINPGFK.S	Q9BUH6	2.42		R.AHASQVC*R.N	Q9UKT7	3.9		R.IALC*IDGPKR.F	Q14CZ7	2.73
K.AC*PLQPDHTNDEKE.-	Q15004	2.42		R.YSSSFC*THDRNTMEALPACLLR.D	P04183	3.83		R.SEVC*FGK.E	Q9BVP2	2.72
R.VSPDGTAFC*SGSWDHTLR.V	O14775	2.42		R.EC*AC*AGLAR.L	Q7Z4Q2	3.82		K.KGVLFGVPGAFTPGC*SK.T	P30044	2.72
K.AIALFTPDAC*GLSDPAHVESLQEK.A	P10588	2.41		K.ATQRPPYC*DGTHR.S	P0C7P0	3.81		R.GDQCC*YSHSPPTPR.V	Q9NXH9	2.72
R.AYC*EGCYVATLEK.C	Q15654	2.41		R.C*NLAC*TPPR.H	P46379	3.8		K.TAFQEALDAAGDKLVVVDFSATWC*GPCK.M	P10599	2.72
R.TGTQEVGGQDPGEAVQPC*R.Q	Q9NZT2	2.41		R.LANEGAC*NEPVLR.R	Q9P2N6	3.8		K.VLSEC*SPLMNDIFNKEC*R.Q	P53618	2.72
R.EMASC*ITQR.K	Q969E8	2.4		-.MKVELC*SFSGYK.I	P83731	3.77		K.LLQC*LHAK.R	Q92621	2.71
R.AASC*GEGKK.R	Q6FI81	2.4		R.VPC*AYDKTALALEVGDIVK.V	P46109	3.76		R.C*IQMWFDPAQGNPNEEVAR.F	P15328	2.7
R.NC*IPIGEQLQSVLGNSGYK.H	Q9H8K7	2.4		K.AVLHPTGPLYC*PEEK.E	Q8IXI2	3.75		K.IRPSILGC*NILR.V	Q9H3M7	2.7
R.SC*PSFSASSEGTR.I	P27707	2.4		R.C*PEQEQR.L	Q9H211	3.75		K.C*KPVPLLELAEGQK.Q	Q8NHV4	2.69
R.C*GDSHPESPVGFGHMSTTGC*VLNK.L	Q9Y6K0	2.39		K.ALLMC*EAC*R.V	P40938	3.73		R.QMTEQVRSIC*K.I	Q9BW27	2.69
K.LGTDKC*DNSSMSLQMGYTQGANQSGQVFGLGR.Q	Q99439	2.38		R.VKC*VGLSAR.T	Q9Y5N6	3.72		R.AGLRKPESQEAAPLSGPC*GR.R	Q9Y6M0	2.68
R.NKDTPAC*SR.R	P42695	2.38		K.SVLTPLRGDVASC*NTQVAEKPVLTAVPGITR.H	O75152	3.72		K.GC*LELIKETGVPIAGR.H	P11586	2.66
K.KVGILDVDLC*GPSIPR.M	Q9Y5Y2	2.37		K.IMDHVEESLC*SAATPK.V	Q6PJG6	3.72		R.EAC*WALR.V	Q6NXE6	2.66
K.SC*GSSSHENRPLDLLHK.M	Q7Z6Z7	2.36		R.KGVHC*VMSLGVPGPATLAK.A	Q96CP2	3.71		K.TIGGGDDSFTTFFC*ETGAGK.H	P68366	2.65
R.C*ELSVEK.S	Q92696	2.35		K.SC*SGVEFSTSGHAYTDTGK.A	Q9Y277	3.7		K.C*TWLTTPK.S	Q9BQ70	2.65
R.DTC*EHSSEAK.A	Q9BWW4	2.35		K.LGTDKC*DNSSMSLQMGYTQGANQSGQVFGLGR.Q	Q99439	3.7		K.KC*DLISIPK.K	Q9ULV4	2.64
R.VAGINAC*GR.G	P51610	2.35		R.KIGHAC*ELR.E	O94768	3.7		K.ILFVGPC*ESGK.T	Q9H7X7	2.64
K.QETHC*QSTPLKK.H	Q9NQW6	2.34		K.SC*GSSSHENRPLDLLHK.M	Q7Z6Z7	3.66		R.C*ALSSPSLAFTPPIK.T	Q8NFH5	2.63
R.SC*GHQTSASSLK.A	Q9HB90	2.34		R.C*GAQDKEHPR.Y	Q96GX9	3.66		R.FILLAC*DGLFK.V	Q9H0C8	2.63
K.LAKEWCFKPC*EIR.E	Q9Y2T3	2.33		R.VVADLSC*VGDEYIAALGGAGGK.G	Q9H4K7	3.66		R.MPNQHAC*K.L	Q9NVI1	2.63
K.SSSSVTTSETQPC*TPSSSDYSDLQR.V	P50552	2.33		K.KINPIC*NDHYR.S	Q96KB5	3.65		K.QC*SAGCAAMERPKPEEK.R	Q17RY6	2.63
K.C*GGIDKR.T	P68104	2.32		R.TSLPC*IPR.E	Q14432	3.62		K.FLEVIKPFC*VILPEIQKPER.K	P61619	2.6
K.C*GGIDKR.T	Q05639	2.32		K.NCTC*GLAEELEKEK.S	Q6FI81	3.6		K.NMITGTAPLDGC*ILVVAANDGPMPQTR.E	P49411	2.6
R.VRESSC*LALNDLLR.G	Q5VYK3	2.31		R.VPAPSIEDIC*HVLSTVC*K.K	P40938	3.6		K.AFPMLC*SLALHK.Q	Q92766	2.6
K.ALLMC*EAC*R.V	P40938	2.31		K.VGILDVDLC*GPSIPR.M	Q9Y5Y2	3.56		R.AC*SVGAVPGITK.F	Q9NVN8	2.59
R.C*QADQAR.L	Q7Z4H7	2.31		K.GC*GGGTHSSDRNQAK.A	Q96NL8	3.56		R.EGLLC*QQQR.D	Q86UV5	2.59
R.FC*PFAER.T	P78417	2.31		R.QAGSVGGLQWC*GEPK.R	Q9BTE3	3.55		R.LWDSHVC*GVSLLSHR.W	Q9Y6M0	2.59
K.ILEC*PIC*LELIKEPVSTK.C	P38398	2.31		K.YQSLGQC*VYVHC*K.A	Q8WUK0	3.55		K.C*DLISIPK.K	Q9ULV4	2.59
R.TLKLTTPTYGDLNHLVSATMSGVTTC*LR.F	Q9BVA1	2.29		R.NKDTPAC*SR.R	P42695	3.53		K.AC*FGAENLMR.V	Q9NVN8	2.58
R.EAC*WALR.V	Q6NXE6	2.29		R.EMASC*ITQR.K	Q969E8	3.52		R.C*LVAGLLSPR.F	Q8WYP5	2.58
R.AFPQLGGRPGPEGEGSLESQPPPLQTQACPESSC*LR.E	O94992	2.29		R.RC*GAQDKEHPR.Y	Q96GX9	3.52		R.EQSC*ELSTCR.Q	Q6P2H3	2.58
R.ETC*STLAESPR.N	Q6P2E9	2.28		R.SPMC*NQPSINK.A	Q08499	3.51		K.SC*SGVEFSTSGSSNTDTGKVTGTLETK.Y	P45880	2.57
K.IGDLTGYC*TNPNR.H	Q9NVN8	2.28		K.KSQAAPGSSPC*R.G	Q8N556	3.49		R.APLAVTSQVINC*R.N	P42695	2.57
R.SVSHPGSC*SSER.S	Q9HB20	2.28		K.RGPEVTSQGVQTSSPAC*K.Q	Q99700	3.48		K.LHIPVMVDEVVHC*LSPQK.G	A6NJ78	2.57
K.IC*ALENELAALR.A	Q15390	2.27		R.C*GDSHPESPVGFGHMSTTGC*VLNK.L	Q9Y6K0	3.47		K.NIVGVVLGC*NNFR.V	Q99707	2.57
K.ITALEDISTEDGDRLYSLC*K.T	O43264	2.27		R.GVC*AER.Y	O15304	3.47		R.AGVRPSSSGSAWEAC*SEAPSK.G	Q12789	2.56
R.AASC*GEGK.K	Q6FI81	2.25		R.VLDALFPC*VQGGTTAIPGAFGC*GK.T	P38606	3.46		R.FSFC*CSPEPEAEAEAAAGPGPCER.L	Q13501	2.55
R.RNLADC*LR.S	P49721	2.24		R.SSLEWNSC*VVQTLK.E	P49792	3.45		K.MVLSRPC*HPDDQFTTSILR.H	Q68E01	2.55
K.SC*GKDGFHIR.V	P27635	2.24		R.SSLEWNSC*VVQTLK.E	Q99666	3.45		K.ASGQPAGPDNKENC*PVPGKPGEAVAAR.K	P04183	2.55
R.STSSC*SSK.Q	Q9H4L5	2.24		R.WC*AVQGQVDEK.T	Q5VY80	3.45		R.IAATPSC*HLLHK.K	Q13535	2.55
R.SDC*ESQECVTK.L	Q9NS86	2.23		R.WC*AVQGQVDEK.T	Q6H3X3	3.45		K.VGILDVDLC*GPSIPR.M	Q9Y5Y2	2.55
K.VASGSTATAAAGPSC*ALK.A	P41134	2.23		R.WC*AVQGQVDEK.T	Q9BZM5	3.45		R.LITC*GTVEEK.I	Q2NKX8	2.54
R.C*YRYC*K.N	P27635	2.23		R.QGVC*IGLSEIMK.S	Q92616	3.43		K.MDSC*IEAFGTTK.Q	Q9GZS1	2.54
K.SFVC*STK.N	O75419	2.23		R.AESSQTC*HSEQGDK.K	P46063	3.43		R.WLC*TGDIGEFEPDGC*LK.I	O95573	2.54
R.KAC*PLQPDHTNDEKE.-	Q15004	2.22		R.C*PGESLINPGFK.S	Q9BUH6	3.43		R.VQYLEDTDPFAC*ANFPEPR.R	Q9Y613	2.53
K.HFLSDTGMAC*R.S	Q5TFE4	2.22		R.NC*GQEPTLK.T	Q96BD8	3.41		R.LQTEAQEDDWYDC*HR.E	Q9UHI6	2.52
R.TTSQC*K.S	Q9NWZ5	2.22		K.ILDHLTMIDNKNESELEAHLC*R.M	Q14008	3.41		R.LFNC*SASLDWPR.M	Q9Y4W2	2.52
K.LHVGNISPTC*TNK.E	Q9BWF3	2.21		R.TTC*LFLHLR.T	P17098	3.41		R.SHHPESGC*R.T	Q5TA50	2.52
R.SDPDAC*PTMPLLAMLLR.G	P57678	2.21		K.TKSC*SGVEFSTSGHAYTDTGK.A	Q9Y277	3.4		K.RPAC*TLKPEC*VQQLLVCSQEAK.K	P32320	2.51
R.LWDSHVC*GVSLLSHR.W	Q9Y6M0	2.19		K.IRPSILGC*NILR.V	Q9H3M7	3.39		K.YKEHPEALSC*LLLQLR.R	Q68E01	2.51
R.C*QGNLETLQK.T	P18074	2.18		R.VNQNNLQAQVIVDYLC*K.L	Q7L8L6	3.39		K.FFAPWC*GHCK.A	Q8NBS9	2.51
K.APPTAC*YAGAAPAPSQVK.S	P17676	2.16		K.GVLFGVPGAFTPGC*SK.T	P30044	3.39		R.TTSQLC*WPLLK.Q	Q9HAV4	2.51
K.ADSINKPFAQQC*QDLVK.V	Q9NXE4	2.16		K.C*GTFGATSLQQR.Y	Q96MX6	3.36		K.ILDHLTMIDNKNESELEAHLC*R.M	Q14008	2.5
K.SKLNILQEGHAQC*LEAVR.L	Q6NXT1	2.15		R.GASC*QGCPNQR.L	P53384	3.36		K.AQAISPC*VQNFCSALDSK.L	Q8WTW3	2.5
R.QAGSVGGLQWC*GEPK.R	Q9BTE3	2.15		R.GASCQGC*PNQR.L	P53384	3.36		K.IIGATDSC*GDLMFLMK.W	P45973	2.49
K.IKSGEEDFESLASQFSDC*SSAK.A	Q13526	2.15		R.RGNVAGDSKNDPPMEAAGFTAQVIILNHPGQISAGYAPVLDC*HTAHIAC*K.F	P68104	3.34		R.EEAIPLPCMC*VTR.E	Q8TB52	2.48
R.RAYC*EGCYVATLEK.C	Q15654	2.14		R.RAGSSGNSC*ITYQPSVSGEHK.A	Q99755	3.33		K.IPIIC*MC*NDR.N	P35251	2.48
K.RPAC*TLKPEC*VQQLLVCSQEAK.K	P32320	2.13		K.KHALNC*HR.M	P40425	3.33		K.EVLAGRPLFPHVLC*HNC*AVEFNFGQK.E	Q00839	2.48
R.ALDC*SEVTVR.A	Q6XQN6	2.12		K.KHALNC*HR.M	P40426	3.33		K.IKSGEEDFESLASQFSDC*SSAK.A	Q13526	2.47
R.LKQPADC*LDGLYALMSR.C	P30530	2.12		R.QPDISC*ILGTGGK.S	P57740	3.31		R.C*SLALPHDESVTQLGQELAQK.L	Q9UGR2	2.47
R.ALC*AIASLGSSDLLPQEHILLR.T	Q96N21	2.11		R.ADHQPLTEASYVNLPTIALC*NTDSPLR.Y	A6NE09	3.31		R.IHC*GLQDSQK.A	Q07864	2.47
R.LQTEAQEDDWYDC*HR.E	Q9UHI6	2.11		K.ERFDPTQFQDC*IIQGLTETGTDLEAVAK.F	Q7L1Q6	3.3		R.TKETNC*ESDRER.G	Q7Z6Z7	2.46
R.NADC*SSGPGQR.V	Q9BSD7	2.11		R.FDPTQFQDC*IIQGLTETGTDLEAVAK.F	Q7L1Q6	3.28		K.NMMAAC*DPR.H	P07437	2.46
R.QLC*GGSQAAIER.M	Q96S59	2.11		R.EAAC*AQNFR.Q	Q96D53	3.27		K.NMMAAC*DPR.H	P68371	2.46
R.EITAIESSVPC*QLLESVLQELK.G	O75694	2.1		R.EAC*WALR.V	Q6NXE6	3.27		K.NMMAAC*DPR.H	Q13509	2.46
K.RPACTLKPEC*VQQLLVCSQEAKK.S	P32320	2.09		R.KQFSVPPAPTRPSC*PAVAEIPLR.M	Q99661	3.27		K.NMMAAC*DPR.H	Q3ZCM7	2.46
K.NGSTAGNSPHC*R.K	Q8TBM8	2.09		K.C*VAGKDLPEGAVK.G	Q92616	3.26		R.NMMAAC*DPR.H	Q9BUF5	2.46
K.SIQTIC*SGLLTDVEDQAAK.G	Q6PCB5	2.08		R.C*LAENSLGSAR.H	P32004	3.25		K.NMMAAC*DPR.H	Q9BVA1	2.46
R.VC*LC*PMIIGR.G	P18074	2.08		R.VC*LC*PMIIGR.G	P18074	3.24		R.SEVC*FGKEGLWK.L	Q9BVP2	2.46
R.KGPGKQEEVC*VIDALLADIRK.G	Q27J81	2.07		K.AIGAVPLIQGEYMIPC*EK.V	P07339	3.23		K.C*EQDREPLR.T	Q9HB19	2.45
R.IC*MAIPAMAIPPLIMDTLEK.K	Q9BWM7	2.06		R.GNVAGDSKNDPPMEAAGFTAQVIILNHPGQISAGYAPVLDC*HTAHIAC*K.F	P68104	3.23		K.KC*PTEYQEK.M	Q68DH5	2.45
R.AAAAC*LDK.A	Q9H3U1	2.06		K.ASC*PAAAPLMER.K	Q96CD2	3.21		R.SAQGC*DLLQNLQNITQGAK.I	Q9UK39	2.45
K.RRPGGEGPQC*EK.T	Q9NWY4	2.06		K.SGIQPLC*PER.S	P42166	3.21		K.YVSVC*EGPLKEQEWNTTNAK.Q	A6NDU8	2.45
K.AGKPPC*GATK.R	Q9BY42	2.06		K.C*KPVPLLELAEGQK.Q	Q8NHV4	3.19		K.KIC*AVGITK.L	P55060	2.44
R.LILC*C*NSTSK.V	P40938	2.05		R.TDPPDGQQDSEC*NR.N	Q9NUQ3	3.19		R.IVKEPTSHDNKDIC*K.S	P49792	2.44
K.AIVLFTSDAC*GLSDVAHVESLQEK.S	P24468	2.03		K.HAC*QLSQR.L	Q6P996	3.18		R.VVSTSLDC*LQK.L	Q9Y6D5	2.43
R.C*PADNPGLVQAQPR.V	Q68CZ2	2.03		R.C*ALLASEVPQLALQLLQDPESYVR.A	Q6PJG6	3.17		K.ACGGPGNFC*PSFSELQR.N	Q15646	2.43
K.GLANVFC*VFTK.G	Q03169	2.02		R.LPPSGSKPVAASTC*SGK.K	O43663	3.17		R.VVFAELAC*R.E	Q8NE71	2.43
R.SPVPLTPPGC*VALDTRAD.-	Q567V2	2.01		-.MKETPLSNC*ER.R	Q06265	3.16		K.LYGSLPLC*VLLER.A	Q9Y256	2.42
K.IALNLEGC*ALSQGSLR.T	Q9NZT2	2.01		R.MDILDVLTLAAQELSRPGC*LGR.T	Q9Y4R8	3.14		R.SVMDATQIAGLNC*LR.L	P34932	2.42
K.ALRPGDPGFC*AR.A	Q96ST2	2.01		K.QFLDFGSSNAC*EK.T	Q15119	3.13		R.VMGIVENMSGFTCPHCTEC*TSVFSR.G	Q9Y5Y2	2.42
R.RGNVAGDSKNDPPMEAAGFTAQVIILNHPGQISAGYAPVLDC*HTAHIAC*K.F	P68104	2		K.SSIINSLKQEQMC*NVGVSMGLTR.S	Q9BVP2	3.13		K.KINPIC*NDHYR.S	Q96KB5	2.41
K.SSSSSSASAAAAAAAASSSASC*SR.R	Q07065	2		K.TSLEVSLLEKYPC*SK.F	O95456	3.12		K.AGTDPSHMPTGPQAASC*LDLNLVTR.V	Q9BQG0	2.41
K.LREELGLC*ER.T	Q12789	2		R.RLQGQC*R.Q	Q86SX3	3.12		R.LYYFQYPC*YQEGLR.S	Q9NRW3	2.41
R.IVGNSGLNIYNLYAPC*AGGVPSHFR.Y	P10619	2		R.SLPAAC*HWALR.E	Q9P296	3.11		R.KTAGQTGMC*GGVR.G	Q5VTL8	2.41
R.SITC*WTLSR.Y	Q92973	1.99		R.VGLGIC*YDMR.F	Q9NQR4	3.09		K.SQC*ALEEYVR.S	P10589	2.41
R.LKDAVAHC*HEAER.N	P49792	1.99		R.EAIHALSSSEDGGHIFC*TLESLKR.Y	Q9Y4R8	3.09		K.SQC*ALEEYVR.S	P24468	2.41
K.C*EQDREPLR.T	Q9HB19	1.99		K.GSEEVDSHC*KK.A	Q9Y4W2	3.09		R.SQLELLISPTC*SC*K.Q	Q29RF7	2.4
R.EC*PSDEC*GAGVFMASHFDR.H	P62979	1.98		K.IATGHNIIDELPPC*KK.K	Q16563	3.09		R.GASC*QGCPNQR.L	P53384	2.4
K.DTC*YSPKPSVYLSTPSSASK.A	Q9Y5K6	1.98		R.SC*PSFSASSEGTR.I	P27707	3.09		R.GASCQGC*PNQR.L	P53384	2.4
R.VVC*SSGAVGNYSGGLAVKEWLLAHEGHR.L	P16455	1.97		K.ISPLSSPC*SSPLQGTPASSLVSK.I	Q14432	3.08		R.KGSSNNQDVVTC*DMAC*K.G	Q6NUQ4	2.4
R.KPNVGC*QQDSEELLK.L	A0AVT1	1.97		K.GVVLC*TFTR.K	O15235	3.07		K.SPLIIFNDC*ELDK.A	Q3SY69	2.4
R.GAGSSSGC*GGPK.G	Q9BX10	1.97		K.SGAMEMAGLC*PAAC*MQTPR.M	Q7L8L6	3.06		K.VELC*SFSGYK.I	P83731	2.4
R.HAPHC*LSEEEGEQDRPR.A	O75190	1.97		K.AKVDEFPLC*GHMVSDEYEQLSSEALEAAR.I	P27635	3.04		K.ELEVLLMC*NK.S	P62910	2.39
K.AANSC*TSYSGTTLNLK.E	Q9UPQ0	1.96		K.DPSKNDTC*K.S	O43169	3.04		R.C*ILTTVDPDTGVMSR.K	Q5VT66	2.39
R.FSPDSTLLATC*SADQTCK.I	Q9BVC4	1.96		K.VVVFIKPTC*PYC*R.R	P35754	3.03		K.TGAAYPC*FC*SPQR.L	Q5JPH6	2.39
K.ESSGLVLLSSC*PQTASR.L	Q6P087	1.95		R.QAFHSHPGTHC*PSPAVKDPNTQSVGNPQR.I	O75616	3.03		R.IGLEGC*LC*QDFYR.I	Q9P2I0	2.38
K.TIPDDTPMC*R.I	Q6R327	1.95		R.ITC*HTVMEVLR.E	P42345	3.01		K.VIIVQAC*R.G	P49662	2.38
R.TDFQQGC*AK.T	O95571	1.94		R.GC*AGGCECGDKGK.C	Q9NYP9	3.01		K.VIIVQAC*R.G	P51878	2.38
K.TFC*GTPEYLAPEVLEDNDYGR.A	P31749	1.94		R.SQAPC*ANKDEADLSSK.Q	Q96SK2	3.01		R.VVSPGPLHC*LK.V	Q96CQ1	2.38
K.TFC*GTPEYLAPEVLEDNDYGR.A	P31751	1.94		R.C*SSSSGGGSSGDEDGLELDGAPGGGKR.A	Q9P258	3		R.LC*DQKFPK.T	C9J3F9	2.37
K.TFC*GTPEYLAPEVLEDNDYGR.A	Q9Y243	1.94		K.SSVHQPGSHYC*QGCAYKK.G	Q9P021	2.99		R.LC*DQKFPK.T	Q9NQ55	2.37
R.C*ILTTVDPDTGVMSR.K	Q5VT66	1.93		R.C*SSVTGVQR.R	O60343	2.99		K.RTIQFVDWC*PTGFK.V	Q71U36	2.35
R.C*AAEREEPPEQR.G	Q9GZP4	1.93		K.NC*GC*LGASPNLEQLQEENLK.L	P54136	2.98		R.LPLMEC*VQMTQDVQK.A	Q01813	2.35
K.APVPC*FGPVFTEVEK.A	Q5T8I9	1.93		K.LVLVLPDVEEQSPESC*GR.I	O60318	2.98		K.C*VALAIYYHIK.N	Q8ND76	2.34
K.IMQNTDPHSQEYVEHLKDEAQVC*AIIER.V	B5ME19	1.93		R.TVAISDAAQLPHDYC*TTPGGTLFSTTPGGTR.I	Q13542	2.97		R.LAAFRPSAFTDTQYLQDTMNHVLSC*VKK.E	P42345	2.34
R.RLC*HAER.R	Q7L576	1.92		R.VDSPSHGLVTSSLC*IPSPAR.L	Q9UER7	2.95		R.LIGPNC*PGVINPGEC*K.I	P53597	2.33
R.KC*PFYAAEQDKGALEGSSC*PFR.T	P30519	1.91		K.GHSSDSNPAIC*R.H	Q5JTH9	2.92		K.FSAIQC*AAAVPR.A	Q15054	2.33
R.AC*SVGAVPGITK.F	Q9NVN8	1.91		R.NSAEAIIHGLSSLTAC*QLR.T	P54274	2.92		R.C*QSPWTEALWVR.L	Q6PJG6	2.32
K.C*NAEEHVR.V	P11279	1.91		R.AAAAC*LDK.A	Q9H3U1	2.92		K.C*SLAVPQDEHVIK.L	Q8IWR0	2.32
K.GSTC*AFTEC*ILR.S	Q05932	1.9		K.C*PYSVPFYPTFK.E	Q53GS7	2.92		R.VKC*VGLSAR.T	Q9Y5N6	2.32
R.TPEQC*PSVVSLLSESYNPHVR.Y	Q99460	1.9		K.MLSC*AGADR.L	P27635	2.91		R.SVAGVC*MSPITVIK.T	Q96DW6	2.32
R.KGPGKQEEVC*VIDALLADIR.K	Q27J81	1.9		R.IDC*FSEVPTSVFGEK.L	O00567	2.9		R.INPYMSSPC*HIEMILTEK.E	J3QL51	2.31
K.YSSVSEPAKVSEC*C*R.F	Q9Y263	1.89		R.KITSNC*TIGLR.G	Q9UPT9	2.9		R.INPYMSSPC*HIEMILTEK.E	P18621	2.31
K.INPIC*NDHYR.S	Q96KB5	1.89		R.TIIPWDVDTIC*K.S	P21953	2.89		R.NLVQC*GDFPHLLVYGPSGAGKK.T	P40938	2.3
R.AC*AAGTPAVIR.I	P51610	1.89		R.IALC*IDGPKR.F	Q14CZ7	2.88		R.SFAFLHC*K.K	O00267	2.3
R.GC*TDC*GWGLAR.R	P27544	1.89		R.LLSQPC*ASDR.F	A3KMH1	2.88		R.KALC*DPLEEVREAAAK.T	Q92616	2.29
K.VFEAEQFGC*PQR.A	Q8NFG4	1.88		R.QSSANLLC*FAPDLIINEQR.M	P04150	2.87		R.AHSNPDFLPVDNC*LQSVLGQR.V	Q5VSL9	2.29
R.WLSC*TATPQIEEEVSLTQK.N	P52948	1.88		R.LIGNESKGEHVPGFC*LPK.K	Q92616	2.86		K.IC*AVGITK.L	P55060	2.29
R.AQIEQVIANC*EHK.N	Q92621	1.87		R.GRDLEQILSQYITFVKPAFEEFC*LPTKK.Y	Q9BZX2	2.86		K.TIPDDTPMC*R.I	Q6R327	2.29
R.LGPGC*GMMAGGK.K	Q96EB1	1.87		R.C*ASC*PYLGMPAFKPGEK.V	Q6FI81	2.85		K.TLC*GTPNYIAPEVLSK.K	P53350	2.29
R.EGRLEDVENLGC*R.L	Q9UJX3	1.86		K.VVQREDVETGLDPLSLLATEC*TGGKTPDSEDKLFSPVIAR.N	Q5VZ89	2.85		R.FQAEC*PHLC*ETSLAGR.A	Q99956	2.28
R.GNVAGDSKNDPPMEAAGFTAQVIILNHPGQISAGYAPVLDC*HTAHIAC*K.F	P68104	1.86		K.AKFENLC*K.L	P08238	2.84		K.ETNC*ESDRER.G	Q7Z6Z7	2.28
R.ILLYAC*R.N	P36954	1.86		R.TREEEC*HFYAGGQVYPGEASR.V	Q13162	2.84		K.AFQYVETHGEVC*PANWTPDSPTIKPSPAASKEYFQK.V	P30048	2.28
K.LLDQC*DLSTSR.C	Q9Y597	1.86		R.GSAC*SNR.S	Q5SNT2	2.84		K.ISSNC*PK.A	P10398	2.27
R.SSESELC*IETPK.L	Q7Z6Z7	1.86		K.NC*EVEQVK.G	Q9UG56	2.83		K.KLYC*QELK.K	Q9BVP2	2.27
K.VQENSAYIC*SR.R	Q9Y3T9	1.86		K.YKVC*NYGLTFTQK.W	Q9Y277	2.82		R.SQAEQC*GTLIR.S	O75448	2.27
R.MDALSC*FLIK.R	Q9C0D5	1.85		R.TLLVNC*QNK.S	Q8TC07	2.82		K.TLSFYFPPC*GK.I	Q9UG63	2.27
K.ILDHLTMIDNKNESELEAHLC*R.M	Q14008	1.85		R.APLAVTSQVINC*R.N	P42695	2.81		K.C*YASDQEVLDMHGFLR.Q	P29590	2.26
R.TTIAC*SLGELPNLKEEDILNK.S	Q7Z4H7	1.85		K.HPAGQQLDEFLQLAVDKVEAGLGSGPC*R.S	Q96T76	2.81		R.ESTGNMVTGQTVC*K.N	Q15021	2.26
R.NYLEPGKEC*VQPATK.S	P16615	1.84		R.VIDLGVMTPC*DK.I	Q99707	2.81		R.TIESYC*QDVLR.R	Q9NVN8	2.26
R.AVHQC*DR.G	Q9Y5Y2	1.84		K.ALRPGDPGFC*AR.A	Q96ST2	2.8		K.AGGFVVGYTSSGNPIFRNPC*TEQILK.L	Q9HAV4	2.25
R.TVLC*GTC*GQPADK.A	P02545	1.84		K.GCPVNTEPSGPTC*EK.K	P53701	2.8		R.IFGSIPMQAC*QQK.D	Q6NZY4	2.25
R.VVSDKTLSFYFPPC*GK.I	Q9UG63	1.83		R.MLSTLSQC*EFSMGK.T	Q6I9Y2	2.79		R.DDFLGSFC*R.Y	Q9NXE4	2.25
R.FQAEC*PHLCETSLAGR.A	Q99956	1.83		K.SC*SGVEFSTSGSSNTDTGKVTGTLETK.Y	P45880	2.78		K.HELQANC*YEEVKDR.C	P23528	2.25
R.GKRPLSEC*QEGK.V	Q9H0K6	1.83		R.NDSPTQIPVSSDVC*R.L	Q8TC07	2.78		R.QGVC*IGLSEIMK.S	Q92616	2.25
R.TC*LITFKPGAFIPGAPVQPVVLR.Y	Q8NF37	1.83		K.QAEDC*ITR.L	O43813	2.78		R.GHC*HAPDEQGLEAR.R	Q4VC44	2.24
R.DHQPC*IIFMDEIDAIGGR.R	P62333	1.82		R.RVQIEAAQC*PDVVVAQIDPK.K	O14893	2.78		K.ETTNIFSNC*GC*VR.A	Q9UBB4	2.24
K.TKSC*SGVEFSTSGSSNTDTGKVTGTLETK.Y	P45880	1.82		K.IQC*FC*FEEQR.L	Q9Y6N1	2.77		R.HVLALTGC*GPGR.A	P0CB43	2.24
K.LIKGEAGQNLLEMMAC*DR.L	P49792	1.82		R.ALVQC*K.E	A7E2V4	2.77		K.LIC*QHIVPGNVK.S	Q9NU22	2.24
K.ALFLLPC*ISR.R	Q658P3	1.82		R.QAHLCVLASNC*DEPMYVK.L	P25398	2.77		R.VC*PQIDADNATDNK.I	Q7Z4S6	2.24
R.APQQGLLSLHPC*LYSTLCR.G	O15230	1.82		K.MC*DFGISGYLVDSVAK.T	P46734	2.76		K.VDEFPLC*GHMVSDEYEQLSSEALEAAR.I	P27635	2.23
R.QIC*AFSDVLPVLSMK.H	Q9Y312	1.82		K.MC*DFGISGYLVDSVAK.T	P52564	2.76		R.FGEMERDC*QIAHGAAQFLR.E	P30876	2.23
K.VVVC*GQASVGK.T	Q9NYR9	1.82		R.HAELIASTFVDQC*K.T	Q9UBB4	2.76		R.EGATSC*SASGIR.A	A7E2V4	2.23
K.ILTDEMLLQAC*EGR.T	Q5T3I0	1.81		R.YGC*EGPSHGGLPGASSEK.G	Q00653	2.76		K.IGEGGFGC*VYR.A	P51617	2.23
-.MREIVHIQAGQC*GNQIGTK.F	Q9BUF5	1.81		K.SVPTTQC*LDNSKK.N	P46013	2.75		R.LLNYPEEVDC*VGLIK.G	Q9C0F1	2.23
R.SVMDATQIAGLNC*LR.L	P34932	1.81		K.KIC*AVGITK.L	P55060	2.75		R.NC*LEC*QQHSQLK.T	P50851	2.23
R.TQADELPAC*LLSAAR.L	P10398	1.81		R.VNDFETADILC*PK.A	Q9BZD4	2.75		K.NGDIC*ETSGKPK.T	E7EQZ4	2.23
K.EALPVSLPQIPC*LSSFK.I	Q9UHI6	1.8		K.C*ASQAGMTAYGTRR.H	Q15417	2.73		K.NGDIC*ETSGKPK.T	Q16637	2.23
K.NDPPMEAAGFTAQVIILNHPGQISAGYAPVLDC*HTAHIAC*K.F	P68104	1.8		R.C*KDAWASEGLLAVLR.A	A6NED2	2.73		R.TC*LHAILNILEK.G	Q92621	2.23
K.SYC*SGTER.V	Q96JP5	1.8		R.TASISSSPSEGTPTVGSYGC*TPQSLPK.F	Q6PKG0	2.71		K.SC*SGVEFSTSGSSNTDTGK.V	P45880	2.22
R.EAIHALSSSEDGGHIFC*TLESLKR.Y	Q9Y4R8	1.79		R.LYYFQYPC*YQEGLR.S	Q9NRW3	2.71		K.RPAC*TLKPEC*VQQLLVCSQEAKK.S	P32320	2.22
R.TKETNC*ESDRER.G	Q7Z6Z7	1.79		R.RAGAAC*TLR.Q	P30291	2.71		R.EC*QLQVFLR.L	Q7Z2Z1	2.22
R.TREEEC*HFYAGGQVYPGEASR.V	Q13162	1.79		R.TPQSPAPC*VLLR.A	Q9Y613	2.71		R.LGGEVSC*LVAGTKC*DK.V	P13804	2.22
R.VPAPSIEDIC*HVLSTVC*K.K	P40938	1.79		R.EAVC*FIPGEGHTLQEHQIVLVEGGR.T	O15235	2.68		R.YQAEINDLENLGEMGSGTC*GQVWK.M	O14733	2.22
R.SGGLHC*SSNAIR.F	Q2M389	1.78		K.TIPDDTPMC*R.I	Q6R327	2.68		K.ETIGVGSYSEC*K.R	Q15418	2.21
R.FMQNNC*VPKK.M	P14635	1.78		K.VVVC*GQASVGK.T	Q9NYR9	2.68		K.QFLDFGRDNAC*EK.T	Q15120	2.21
R.TLFQAC*TDEEAAVVQSC*TR.S	Q86Y56	1.78		R.LFNC*SASLDWPR.M	Q9Y4W2	2.67		R.C*QDVSAGSLQELALLTGIISK.A	Q92621	2.21
K.AGPGSLELC*GLPSQK.T	Q14684	1.77		K.AKENDENC*GPTTTVFVGNISEK.A	P49756	2.66		K.AQLSGLQLQPC*LYK.R	O43159	2.21
R.C*NLEEISNYYGVSGFQTTEHFLTAVAHR.L	Q9NVN8	1.77		K.VVVFIKPTC*PYCR.R	P35754	2.65		R.RC*EENTK.V	Q92503	2.21
R.GKVQEGSARPPSAVACEDC*SCRDEK.V	Q9BZG8	1.77		R.AASC*GEGK.K	Q6FI81	2.65		K.LKEQEC*R.N	P61421	2.21
K.YDGYTSC*PLVTGYNR.V	Q9Y6N5	1.76		R.SAVLISSKPGC*FIAGADINMLAAC*K.T	P40939	2.65		R.GC*QLLVYPGAFNLTTGPAHWELLQR.S	Q9NQR4	2.21
K.ERFDPTQFQDC*IIQGLTETGTDLEAVAK.F	Q7L1Q6	1.76		K.SASVAPFTC*K.T	P49790	2.64		K.LPFTDTEQEC*LVK.F	Q8WYP5	2.21
R.LALFNPDVC*WDRNNPEPWNKLGPNDQYK.F	O00483	1.75		K.AIALFTPDAC*GLSDPAHVESLQEK.A	P10588	2.63		K.LTC*LELIQNTHSQSC*LK.S	Q9BYW2	2.21
R.SHAVAC*VNQFIISR.T	Q92973	1.75		R.C*ILTTVDPDTGVMSR.K	Q5VT66	2.63		R.SC*WVLHAFSSLK.F	O15397	2.21
R.GQTVC*NVK.L	Q92621	1.75		R.FSPPPSPPGPC*MPEVFLEAAVALIQAGR.A	O15287	2.63		R.VC*LC*PMIIGR.G	P18074	2.21
K.MLEC*IAR.S	Q86XI2	1.75		K.IALNLEGC*ALSQGSLR.T	Q9NZT2	2.63		R.SSESELC*IETPK.L	Q7Z6Z7	2.21
K.YAGGNPVC*VRPTPK.W	Q15004	1.75		R.MFDQQIC*HR.S	Q12802	2.63		K.SSGEIVYC*GQVFEK.S	Q02543	2.2
K.RPAC*TLKPEC*VQQLLVCSQEAKK.S	P32320	1.75		R.IPRPSVSQGC*SR.E	O75122	2.63		K.YKVC*NYGLTFTQK.W	Q9Y277	2.2
R.EVMDLITVC*C*VSK.K	Q9HAV4	1.74		K.LGC*C*VVEKPQPK.K	Q9NRR8	2.61		R.C*EMASTGEVAC*FGEGIHTAFLK.A	P31327	2.2
K.QGELIRDSAQC*AAIAER.L	Q96RS6	1.74		K.QDSVQC*ER.K	P13056	2.6		K.ELSC*TELQELK.Q	H3BQ06	2.2
R.LLDRDAC*DTVR.V	Q9NZL4	1.74		R.IQESC*QSGTK.W	Q9BSJ6	2.59		K.ELSC*TELQELK.Q	Q9ULP9	2.2
R.ESTGNMVTGQTVC*K.N	Q15021	1.74		R.WC*NVQSTQDEFEELTMSQK.N	P27707	2.59		R.EDLDKVLNYC*R.I	Q9Y5L0	2.19
K.LELSGC*EQGLHEIK.L	P16455	1.74		K.IC*AVGITK.L	P55060	2.59		R.TLVGIC*SEHQSR.T	Q9H3U1	2.19
R.SGGSGGCSGAGGASNC*GTGSGR.S	Q15005	1.74		K.C*IVNNVSAETVQTVR.Y	Q8N0X7	2.58		K.IDATQVEVNPFGETPEGQVVC*FDAK.I	Q96I99	2.19
R.ERDEENQEMSSC*K.S	O60934	1.73		K.ETGC*MVYEK.L	Q9H2H9	2.57		K.LHC*AFASLPK.H	Q6P0N0	2.19
R.FC*GDLDCPDWVLAEISTLAK.M	Q9H0A8	1.73		K.VVVFIKPTCPYC*R.R	P35754	2.57		R.AC*WVLHYFC*EVK.F	O95373	2.19
K.GKGSTC*AFTEC*ILR.S	Q05932	1.73		K.EGAPSLLC*K.Y	Q9UBB6	2.56		R.TFVSGAC*DASIK.L	P62879	2.19
K.NREC*LLSAPR.K	Q86XI2	1.72		K.ARPPQHC*LKEEELER.K	O43688	2.56		R.SQKPEAGGC*GAPAAR.E	O60343	2.18
K.SC*SGVEFSTSGHAYTDTGK.A	Q9Y277	1.72		R.C*VRDPQR.S	Q96BD0	2.56		R.MVESCLGSPC*WASPQLLR.I	Q9Y4W2	2.18
R.AAGGSPAVGC*TTR.G	Q7Z624	1.72		K.AAASGQPRPEMQC*PAEHEEDMYR.A	Q96BN8	2.56		R.QLC*GVAFLR.L	Q6P5Z2	2.18
R.ATGHSGGGC*ISQGR.S	Q9HA64	1.72		R.ASC*ILQLVK.H	O14617	2.55		R.RTDPEC*TAPIKK.Q	Q8N1G2	2.18
R.NAQLDC*SKLETLGIGQR.T	Q9NZL9	1.72		R.C*ATPVIIDEILPSKK.M	Q9ULW0	2.55		K.SLC*IPFKPLC*ELQPGAK.C	P07814	2.17
K.QEMLQTEGSQC*AK.T	Q9UI12	1.72		R.KTAGQTGMC*GGVR.G	Q5VTL8	2.55		K.AFGELC*PNTAPLPQLVTEALQTGTTEWFHLK.Q	Q70J99	2.17
K.NNQESDC*VSK.K	A6NDG6	1.71		K.QYYIGDIHPSDLKPESGSKDPSKNDTC*K.S	O43169	2.55		R.C*SSSSGGGSSGDEDGLELDGAPGGGKR.A	Q9P258	2.17
R.NLVQC*GDFPHLLVYGPSGAGKK.T	P40938	1.7		R.SGGSGGCSGAGGASNC*GTGSGR.S	Q15005	2.54		K.YKWC*EYGLTFTEK.W	P45880	2.16
K.MC*DFGISGYLVDSVAK.T	P46734	1.7		R.GKYDC*GHVQKK.-	O15235	2.53		R.ACC*HSTGAGK.L	O95235	2.15
K.MC*DFGISGYLVDSVAK.T	P52564	1.7		R.KGSSNNQDVVTC*DMAC*K.G	Q6NUQ4	2.53		K.AMTNHC*K.S	Q14966	2.15
R.KASATC*SSATAAASSGLEEWTSR.S	Q96G74	1.7		R.EC*PSDEC*GAGVFMASHFDR.H	P62979	2.52		R.DLSYC*LSGMYDHR.Y	P52597	2.15
R.EGDVLSNC*EFTPAPTPQEHLTK.N	Q6P3X3	1.7		R.LLKPMC*QENLPIEAVYHR.Y	Q9NVX0	2.52		R.AASDKGSSC*SSSR.Q	Q8NAN2	2.15
K.LC*RPC*QAAVEYYIK.H	Q5SNT2	1.7		R.AQEPLVDGC*SGGGR.T	Q7Z2K6	2.51		R.LDDLC*TR.L	Q6NXT1	2.15
-.MRDADADAGGGADGGDGRGGHSC*R.G	Q14657	1.69		R.FLEQQTLC*NNQVNDLTTALK.E	Q9Y448	2.51		R.EKPHACC*ECGK.T	Q8N0Y2	2.15
K.VFFIQAC*QGDNYQK.G	Q14790	1.69		K.VGSC*AEAGEGSR.G	E9PET5	2.51		R.AAAGGLAMLTSMRPTLC*SR.I	Q9H3U1	2.14
R.KADVEGELLAC*R.N	P46013	1.69		K.VIIVQAC*R.G	P49662	2.51		K.KPVSTTNLQDPGVLGC*PR.T	Q92621	2.14
K.LGIQGSYFC*SQEC*FK.G	P53582	1.69		K.VIIVQAC*R.G	P51878	2.51		R.LVDC*CSER.L	Q8WXG6	2.14
R.TFVSGAC*DASIK.L	P62879	1.69		K.KPLKPC*CACPETKK.A	Q14061	2.5		R.DISMNHLPGLLTSLLGLRPEC*EQSALEGMK.A	Q8IZL8	2.14
K.KINPIC*NDHYR.S	Q96KB5	1.69		R.C*SLLDPFAAVR.R	Q86Y56	2.5		K.GWNEC*EQTVALLSLLK.R	Q5PRF9	2.14
K.SAC*GNCYLGDAFR.C	Q6FI81	1.68		K.QLPDC*IVGEDGLILTPLGR.Y	Q9NXE4	2.5		K.GWNEC*EQTVALLSLLK.R	Q9UPU9	2.14
R.HATAEEVEEEERDRIPGPVC*K.G	Q8TDN6	1.68		R.TTSQLC*WPLLK.Q	Q9HAV4	2.5		R.TDFQQGC*AK.T	O95571	2.13
R.KVEEVTKVC*EGR.R	P37198	1.68		K.GKGSTC*AFTEC*ILR.S	Q05932	2.49		K.LLSLLPLSC*QK.R	Q9Y289	2.13
K.SGDAAIVEMVPGKPMC*VESFSQYPPLGR.F	Q05639	1.68		K.AGGFVVGYTSSGNPIFRNPC*TEQILK.L	Q9HAV4	2.48		R.DRNALQHC*YWK.Y	Q9NRZ9	2.13
K.C*SLAAGEAALTR.M	Q96EX3	1.68		R.AIQTVSC*LLQGPC*DAGNR.A	Q9H3U1	2.48		K.ASC*TDGR.L	Q9H8M1	2.13
K.KHALNC*HR.M	P40425	1.68		R.ELAIC*TVGR.L	P42345	2.48		R.EAC*EHSGEAK.A	Q9BWG4	2.13
K.KHALNC*HR.M	P40426	1.68		R.MTC*HKR.Y	Q9BVP2	2.48		K.FLVHNVKELEVLLMC*NK.S	P62910	2.13
R.SVC*PGGSSPGSSSGGGR.G	Q53LP3	1.68		R.TAPSSSC*TAVASAASRPDSTHMVEAR.Q	Q9BTC0	2.48		K.FNPEAGANC*LVK.Y	O14777	2.13
R.FQSAAIGALQEASEAYLVGLFEDTNLC*AIHAK.R	P84243	1.67		R.VWAVLPSSPEAC*GAASLQER.A	Q5T440	2.48		R.GAGC*TINDMWDQDYDKK.V	Q96H96	2.13
K.ILTAALTC*PK.T	Q5VZ89	1.67		R.YIFDAEC*ALEK.L	P09884	2.48		K.KQINVC*SQLDWK.R	P52948	2.13
K.VAAAASC*LSQK.V	O95067	1.67		K.EQPQLTSTC*HIAISNSENLLGK.Q	P46013	2.47		R.YFTTVC*VR.L	Q14C86	2.13
K.KGVLFGVPGAFTPGC*SK.T	P30044	1.67		K.LC*SLLDSEDYNTC*EGAFGALQK.I	Q92973	2.47		K.NC*MTDLLAKLEAK.T	Q00765	2.12
K.ISSNC*PK.A	P10398	1.67		R.TGTAQPGTQTC*STSTQSK.S	Q9H2F5	2.47		K.AVLAASSPYFC*DQVLLK.N	O43298	2.12
K.KPLKPCC*ACPETK.K	Q14061	1.67		K.LPLGFTFSFPC*HQTK.L	P52789	2.46		R.SSC*SPGGR.T	Q6UB35	2.12
K.KPLKPCC*ACPETKK.A	Q14061	1.67		R.GIKVEGC*VR.M	Q53GS7	2.46		R.TWLQC*SR.A	Q9BXS9	2.12
K.KPLKPCCAC*PETK.K	Q14061	1.67		K.LC*RPC*QAAVEYYIK.H	Q5SNT2	2.46		K.NADMSEEMQQDSVEC*ATQALEKYNIEKDIAAHIKK.E	P63167	2.11
R.FQAEC*PHLC*ETSLAGR.A	Q99956	1.66		R.GTRPAPGGC*IQPR.G	Q96RR4	2.46		R.KC*YWGFHSHFSR.E	Q7Z460	2.11
R.FSFC*C*SPEPEAEAEAAAGPGPCER.L	Q13501	1.66		R.C*HAVHVALVLFELK.L	Q8N1F7	2.45		R.LGYVC*PQEVAPMLQQFIRPWC*TSLR.N	O14787	2.11
K.MLAEVLGGINC*VK.A	Q53R41	1.66		K.KPLKPCC*ACPETK.K	Q14061	2.45		R.LGYVC*PQEVAPMLQQFIRPWC*TSLR.N	Q92973	2.11
R.MSYLTAMGADYLSC*DSR.L	Q9UDY2	1.66		K.GRAPC*AGPSREEELAAVR.E	Q9BU76	2.44		R.DAPAPAASQPSGC*GK.H	Q96I15	2.11
R.QDLADVVQVC*EGK.K	Q14204	1.66		R.C*YRQELC*K.L	Q5VYK3	2.44		K.C*PLDPYFIMPDK.C	P33992	2.1
R.VLDC*GAAPGAWSQVAVQK.V	Q9UI43	1.66		K.GVLSGEEC*KK.Q	Q9NVI1	2.43		R.ESSYAC*YYDEKR.S	Q99538	2.09
R.INKMLSC*AGADR.L	P27635	1.66		R.LEC*VEPNC*R.S	H7BZ11	2.43		R.RC*GAQDKEHPR.Y	Q96GX9	2.09
R.APLAVTSQVINC*R.N	P42695	1.65		R.LEC*VEPNC*R.S	Q969Q0	2.43		R.FAASNPC*GNIQR.S	Q9NU22	2.09
K.LKESAQCVGDEFLNC*K.L	Q9Y5X2	1.65		K.ILFVGPC*ESGK.T	Q9H7X7	2.43		K.KC*EHDPHVLLAVAK.L	O94906	2.08
K.LVDLPC*VMESLK.T	Q15545	1.65		K.C*GHTNNLRPK.K	P62987	2.41		R.EKLGC*QDAFPEVYDKIC*K.A	Q15392	2.08
R.QGVC*IGLSEIMK.S	Q92616	1.65		R.HGGPQYC*R.S	O14684	2.41		R.WLSC*TATPQIEEEVSLTQK.N	P52948	2.08
R.VFC*NFQYAPQLAEALIK.V	Q14139	1.65		K.QSQTTSIASEDPLQNLC*LASQEVLQK.A	Q8N5C7	2.41		R.C*SVPVDQASESLLK.S	Q9NVN8	2.08
R.AVDLC*AAPGSWSQVLSQK.I	Q9UET6	1.64		K.IKSGEEDFESLASQFSDC*SSAK.A	Q13526	2.4		R.GVPLHC*LHGLR.G	Q8N1F8	2.08
R.TIAALLPC*LLDK.G	Q5VYK3	1.64		R.AFGGPGAGC*ISEGR.A	Q9H479	2.4		R.QVSTEEAQAWC*R.D	P51151	2.08
K.AFLDNPGILSELC*GTLSR.L	Q6NXE6	1.64		R.C*ALSSPSLAFTPPIK.T	Q8NFH5	2.4		R.EITAIESSVPC*QLLESVLQELK.G	O75694	2.07
K.C*GVPFTDLLDAAK.S	Q01433	1.64		K.SVPTTQC*LDNSK.K	P46013	2.4		K.VGEC*EASAMLPLEC*QYLNK.N	Q9H3P2	2.07
R.C*PQLPGGGAQMYSHGIELACQK.Q	Q7L3B6	1.64		K.QRNPMDYPVEDAFC*KPQLVK.K	Q8NFJ5	2.39		K.YAVGEEC*DFEVGKEK.M	Q9UIG0	2.07
R.SGC*IQEQLLQSTFSVHYLVLK.D	Q9BXW9	1.64		R.SVSPC*SNVESR.L	Q9UQ35	2.39		K.DVALSSGSAC*TSASLEPSYVLR.A	Q9Y697	2.07
R.VC*VIDEIGK.M	Q9BSD7	1.64		K.DAVFDGSSC*ISPTIVQQFGYQR.R	P04049	2.38		K.VGAPTIPDSC*LPLGMSQEDNQLK.L	Q92989	2.07
R.YYYQGC*ASWK.W	Q9H0D6	1.64		R.GADASMAC*R.K	Q8N201	2.38		K.NAIQLLASFLANNPFSC*K.L	Q15021	2.06
K.KPLKPC*CACPETK.K	Q14061	1.64		R.AC*STVEGK.W	Q96RL1	2.37		K.ARPPQHC*LKEEELER.K	O43688	2.06
K.NLEAVETLGSTSTIC*SDK.T	P05023	1.63		R.GQTVC*NVK.L	Q92621	2.37		R.KFPYC*EATLLQQLVR.S	Q8IV38	2.06
K.GSRHPC*ITK.T	P52701	1.63		K.IC*RDPQTPVLQTK.H	Q9ULW0	2.37		R.GEFC*SQGVR.E	Q9UID3	2.06
K.ASC*PAAAPLMER.K	Q96CD2	1.63		R.VMGIVENMSGFTC*PHCTECTSVFSR.G	Q9Y5Y2	2.36		R.LAQMSIC*SSLAR.K	O95861	2.06
R.C*KYISLIYTNYEAGKDDYVK.A	P09211	1.63		K.GGTPVC*K.K	Q69YH5	2.36		R.RLGIPEC*ILLVTQR.I	Q12802	2.05
R.GGLPC*AR.A	Q8NBI6	1.63		R.WLLC*NGSLFR.Y	Q9NX61	2.36		R.LQAPVLVAAPHSTFFDPIVLLPC*DLPK.V	Q643R3	2.05
R.TLLVNC*QNK.S	Q8TC07	1.63		K.VDEFPLC*GHMVSDEYEQLSSEALEAAR.I	P27635	2.36		K.STVPHAYATADC*DLGAVLK.V	O00330	2.04
K.VAC*C*PLER.C	Q15021	1.63		R.LGC*NAGVSPSFQQHCVASLATK.A	Q13572	2.35		R.SIQFVDWC*PTGFK.V	P68366	2.04
K.VC*NYGLTFTQK.W	Q9Y277	1.62		R.MVALCTC*K.A	P0C7P0	2.35		K.KITAFVPNDGC*LNFIEENDEVLVAGFGR.K	P62266	2.04
R.AVMEQIPEIQKDSLDQFDC*K.L	Q9HAV4	1.62		R.VAGINAC*GR.G	P51610	2.35		R.IVQNC*GTEK.E	Q6P4Q7	2.04
R.LIAGC*IGKPLGEQFRK.E	Q9HAV4	1.62		R.LKDAVAHC*HEAER.N	P49792	2.34		R.IVQNC*GTEK.E	Q9H8M5	2.04
K.SQAAPGSSPC*R.G	Q8N556	1.62		R.LKDAVAHC*HEAER.N	Q99666	2.34		K.NAC*LQTSSLAVR.V	Q6P3W7	2.04
-.MKVELC*SFSGYK.I	P83731	1.61		K.RPAC*TLKPEC*VQQLLVCSQEAKK.S	P32320	2.34		K.SLQC*MDNNLLQAR.A	Q9H2Y7	2.04
R.LAVLMEAQC*R.Q	Q9Y4R8	1.61		R.LKPDPEPDDKNQEPSSC*K.S	Q9GZU8	2.34		K.TSC*ADMQK.M	O95239	2.04
R.AIQTVSC*LLQGPC*DAGNR.A	Q9H3U1	1.61		K.C*NEQPNRVEIYEK.T	Q7L576	2.34		R.FSPEFVDFTAQC*LR.K	P46734	2.03
R.FSFC*CSPEPEAEAEAAAGPGPCER.L	Q13501	1.61		K.C*NEQPNRVEIYEK.T	Q96F07	2.34		R.RPPEAC*EELR.L	Q86Y56	2.03
R.YSTGSDSASFPHTTPSMC*LNPDLEGPPLEAYTIQGQYAIPQPDLTK.L	Q15366	1.61		R.KPNVGC*QQDSEELLK.L	A0AVT1	2.34		K.SVLC*STPTINIPASPFMQK.L	Q96KB5	2.03
K.C*SLPAEEDSVLEK.L	P27816	1.61		R.KC*MLDAALATLNTHGK.E	Q92616	2.33		K.SSSSSSASAAAAAAAASSSASC*SR.R	Q07065	2.03
R.TC*QFC*PQFR.E	P21580	1.6		K.KTLELLVC*R.V	Q9BXW9	2.32		R.KFVC*PGINVK.C	Q9UKD1	2.03
R.AATEC*MC*NLAMSK.E	Q9H3U1	1.6		-.FYLFLFIC*FFLFLR.R	H0YIA3	2.32		R.GMGMNSPELLLLVENC*PK.G	Q92797	2.03
R.SQKPEAGGC*GAPAAR.E	O60343	1.6		R.HFMELVTC*GLSK.N	Q92665	2.32		K.SGAMEMAGLCPAAC*MQTPR.M	Q7L8L6	2.03
R.RAVTVAFC*TLPTR.E	Q5TA50	1.6		K.LVDLPC*VMESLK.T	Q15545	2.32		R.VLKGNTAEGC*VHETQEK.Q	Q9BQG0	2.02
K.KAYSFC*GTVEYMAPEVVNR.Q	Q15418	1.6		K.LVTVWSAPNYC*YR.C	O00743	2.31		R.AC*QSLASR.D	Q12789	2.02
K.AVETVHNLC*C*NENK.G	Q8IXH7	1.59		R.C*SDAAGYPHATHDLEGPPLDAYSIQGQHTISPLDLAK.L	Q15365	2.31		R.FSFCC*SPEPEAEAEAAAGPGPCER.L	Q13501	2.02
R.AYCHILLGNYC*VAVADAKK.S	Q9Y2Z0	1.59		R.ASFETLPNISDLC*LR.D	Q9H019	2.3		R.LSTC*LLSAPSGIQR.L	Q8TER5	2.02
R.CASC*PYLGMPAFKPGEK.V	Q6FI81	1.59		K.C*HAEHTPEEEIDHTGAK.T	O95757	2.3		K.NC*GC*LGASPNLEQLQEENLK.L	P54136	2.01
K.AIGAVPLIQGEYMIPC*EK.V	P07339	1.59		R.WLSC*TATPQIEEEVSLTQK.N	P52948	2.3		R.KC*PFYAAEQDKGALEGSSC*PFR.T	P30519	2.01
K.GVPPLLC*NMGEK.F	Q6YHU6	1.59		R.SPVPLTPPGC*VALDTRAD.-	Q567V2	2.29		R.C*ILTTVDPDTGVIDR.K	Q969Z3	2.01
R.HTAC*NEQQR.T	Q5T4S7	1.59		K.GC*TIVKPFNLSQGK.K	Q9ULW0	2.29		R.HGGPQYC*R.S	O14684	2.01
R.YKVQNNLYHHC*VINK.L	Q12769	1.59		K.VKNNIDVC*PEC*GHLK.Q	Q9BYC8	2.28		K.VADSELC*K.L	Q8TCG1	2.01
R.VQPAC*K.R	P35227	1.59		K.YMAC*C*LLYR.G	P68366	2.28		K.VIPTEC*AIK.V	O14730	2.01
K.GEAGQNLLEMMAC*DR.L	P49792	1.58		K.YMAC*C*LLYR.G	Q71U36	2.28		R.VPC*NTVFGSQHQMDVAFLEK.L	Q6P996	2.01
R.ALC*DLGPWVK.C	Q8N0U8	1.58		R.QAAAIILNIYC*SR.S	Q92616	2.28		R.VVTC*SLLALKR.L	O94822	2.01
K.EQIQMDDYGLC*QCCK.A	Q92990	1.58		R.VSDC*IPLSHR.G	B0I1T2	2.28		K.KTLELLVC*R.V	Q9BXW9	2
R.GTEAGQVGEPGIPTGEAGPSC*SSASDKLPR.V	O15355	1.58		K.LASTPFKGGTLFGGEVC*K.V	P42166	2.27		R.EQAKEAC*K.A	Q01780	2
K.GVLFGVPGAFTPGC*SK.T	P30044	1.58		K.RPAC*TLKPEC*VQQLLVCSQEAK.K	P32320	2.27		R.IQDLHLPGHTC*ALSWR.E	Q13444	2
K.LFDDLKC*DAERENFHR.L	Q9H3U1	1.57		R.QLC*GGSQAAIER.M	Q96S59	2.27		R.ISIESAC*EK.Q	Q9NVC6	2
K.ETTNIFSNC*GC*VR.A	Q9UBB4	1.57		R.C*MTNTPVVVR.E	P32322	2.26		R.LC*YNYPVIQNYYTSR.R	Q8WYP5	2
K.ASC*QESAR.I	Q9Y6K9	1.57		R.GDLNDC*FIPC*TPK.G	P11586	2.26		R.TAC*TNFMMTPYVVTR.Y	P45984	2
R.C*ALSSVDIYR.T	Q9Y316	1.57		R.HAYLQC*MLASYR.G	Q92616	2.26		K.TAVC*DIPPR.G	P07437	2
R.SRGEEQGC*QGDGDAGVK.A	Q13671	1.56		K.TKSC*SGVEFSTSGSSNTDTGKVTGTLETK.Y	P45880	2.25		K.TAVC*DIPPR.G	P68371	2
R.GRQAEEEC*AHR.G	Q9H147	1.56		K.C*LEPTVALLR.W	Q8TCG1	2.25		K.TAVC*DIPPR.G	Q3ZCM7	2
R.AVTVAFC*TLPTR.E	Q5TA50	1.56		R.AVMEQIPEIQKDSLDQFDC*K.L	Q9HAV4	2.25		K.TAVC*DIPPR.G	Q9BVA1	2
K.EHAASLC*R.C	Q9H0A8	1.56		R.VLIHWMTLC*QTQMK.L	Q8IUX1	2.25		K.TKSC*SGVEFSTSGSSNTDTGK.V	P45880	2
R.AMAFSTGYPGDFTIPRPSGGGVHC*QEPR.R	Q6GQQ9	1.56		K.QLSSC*LPNIVPK.L	Q92616	2.24		R.LPADTC*LLEFAR.L	Q8NF37	1.99
K.KLEESKQWEC*LTSEC*R.V	Q5VYK3	1.56		R.ERDEENQEMSSC*K.S	O60934	2.24		R.MYGC*DVGPDGR.L	P04222	1.99
K.SC*DPGLEDPC*GLNR.A	Q9HAV4	1.56		R.FQAEC*PHLC*ETSLAGR.A	Q99956	2.24		R.MYGC*DVGPDGR.L	P18462	1.99
K.TC*VVGFAGLR.Q	Q9Y4R8	1.56		R.SRGTATAC*R.L	Q96H72	2.24		R.MYGC*DVGPDGR.L	P30453	1.99
K.THISSQNSELSSAALQALGFC*LYNPK.I	Q5UIP0	1.56		R.RQLC*GGSQAAIER.M	Q96S59	2.24		R.MYGC*DVGPDGR.L	P30456	1.99
K.VPGEQGSDEEHC*KEHR.A	Q9UNS1	1.56		K.TILTLTGVSTLGDVKNNQESDC*VSK.K	A6NDG6	2.23		R.MYGC*DVGPDGR.L	P30466	1.99
K.ITFDDYIACC*VK.L	P30626	1.55		K.STAALSGEAASC*SPIIMPYK.A	Q14244	2.23		R.MYGC*DVGPDGR.L	P30479	1.99
K.AKVDEFPLC*GHMVSDEYEQLSSEALEAAR.I	P27635	1.55		R.VMGIVENMSGFTCPHCTEC*TSVFSR.G	Q9Y5Y2	2.23		R.MYGC*DVGPDGR.L	P30481	1.99
K.C*ASQAGMTAYGTR.R	Q15417	1.55		R.AQLC*NPGR.S	Q9H6K4	2.22		R.MYGC*DVGPDGR.L	P30484	1.99
K.C*HAEHTPEEEIDHTGAK.T	O95757	1.55		R.STSGPRPGC*QPSSPCVPK.L	O14545	2.22		R.MYGC*DVGPDGR.L	Q29836	1.99
R.IC*MAIPAMAIPPLIMDTLEKK.D	Q9BWM7	1.55		R.STSGPRPGCQPSSPC*VPK.L	O14545	2.22		R.MYGC*DVGPDGR.L	Q95365	1.99
R.YGC*EGPSHGGLPGASSEK.G	Q00653	1.55		K.QAGSSSASQGC*NNQ.-	Q16644	2.22		K.GQLGSTQSQGLVPC*VMFVLK.E	Q5SRE5	1.98
R.IPGPVC*K.G	Q8TDN6	1.55		K.KTPTEAPADC*R.A	Q7Z6Z7	2.22		K.C*NAEEHVR.V	P11279	1.98
R.GRDLEQILSQYITFVKPAFEEFC*LPTK.K	Q9BZX2	1.54		R.VPC*NTVFGSQHQMDVAFLEK.L	Q6P996	2.21		K.SLLNQC*IEER.Y	Q96GM8	1.98
R.TVAISDAAQLPHDYC*TTPGGTLFSTTPGGTR.I	Q13542	1.54		R.RFSFC*CSPEPEAEAEAAAGPGPCER.L	Q13501	2.21		R.FAEEKEWDSEASC*PK.Q	Q9NQS1	1.98
R.NPMDYPVEDAFC*KPQLVK.K	Q8NFJ5	1.54		K.AC*QEDDVR.L	Q68E01	2.21		R.SFC*QSYDMK.Q	Q7Z3U7	1.98
K.GYWASLDASTQTTHELTIPNNLIGC*IIGR.Q	Q15365	1.54		R.ATGHSGGGC*ISQGR.S	Q9HA64	2.21		R.SLVHYC*FDLR.F	P35251	1.98
R.ISASC*QHPTAFEEAIPK.S	Q9ULA0	1.54		R.GLINLGNTC*FMNC*IVQALTHTPLLR.D	Q9UPT9	2.21		K.TTIIEC*LK.Y	Q92878	1.98
R.MAVPTC*LLQMK.I	Q9P000	1.54		R.HTAC*NEQQR.T	Q5T4S7	2.21		R.FFGTAVTC*LLSPHSQVLTAATQSLKEILK.E	Q5JTH9	1.97
R.MPYAC*K.L	P30876	1.54		R.KADVEGELLAC*R.N	P46013	2.2		R.EGGPLPNC*FTTPLR.Q	O43572	1.97
R.ANSSVVSVNC*K.G	O60502	1.53		R.FSFC*CSPEPEAEAEAAAGPGPCER.L	Q13501	2.2		K.ISSQQNPNSNTLGHILC*VIGHIAK.H	P42695	1.97
R.GLTDC*C*LK.T	Q9Y619	1.53		R.FSFCC*SPEPEAEAEAAAGPGPCER.L	Q13501	2.2		K.VVVLNC*EPSKER.M	Q14690	1.97
R.RASC*TSSTSGSKR.N	P13807	1.53		R.IC*SLNLPSEESTR.E	Q9Y620	2.2		R.YHPLSSC*LTAR.L	Q96T76	1.97
R.VQVMDAC*LR.C	Q9UBF6	1.53		K.TLESQNLFC*C*LYR.S	Q08AM6	2.2		R.YVAAAFPSAC*GK.T	Q16822	1.97
R.DSAQC*AAIAER.L	Q96RS6	1.53		K.LGC*QDAFPEVYDKIC*K.A	Q15392	2.19		R.ESSYAC*YYDEK.R	Q99538	1.97
K.MVAAVAC*AQVPK.I	Q9HCC0	1.52		K.VELC*SFSGYK.I	P83731	2.19		K.ALLLVPASVNC*LR.L	Q5SRE5	1.96
R.KGSSNNQDVVTC*DMAC*K.G	Q6NUQ4	1.52		K.RPQYC*SETQSK.K	Q86TC9	2.18		R.TREEEC*HFYAGGQVYPGEASR.V	Q13162	1.96
R.VHIPNDDAQFDASHC*DSDKGEFGGFGSVTGK.I	Q16576	1.52		R.SNNVEDC*K.M	Q9BXS9	2.18		R.LIGNESKGEHVPGFC*LPK.K	Q92616	1.96
R.IDC*FSEVPTSVFGEK.L	O00567	1.52		K.TLELLVC*R.V	Q9BXW9	2.18		K.QFLDFGSVNAC*EK.T	Q15118	1.96
R.NAC*IEC*SVNQNSIR.N	Q9UBB4	1.52		K.FSGTYTC*MNTFK.G	O75911	2.17		K.SPAESC*DLLGDIQTC*IR.K	Q9BQG0	1.96
K.AAQGPPAPAVPPNTDVMAC*TQTALLQK.L	O60232	1.52		R.GSC*GSSGR.T	Q9UPN9	2.17		K.NMSVHLSPC*FR.D	P62280	1.96
K.C*VAGKDLPEGAVK.G	Q92616	1.52		K.VGAPTIPDSC*LPLGMSQEDNQLK.L	Q92989	2.17		K.RSIQFVDWC*PTGFK.V	P68366	1.96
R.FGEMERDC*QIAHGAAQFLR.E	P30876	1.52		R.RPPEAC*EELR.L	Q86Y56	2.16		K.DYEQPTC*AK.V	Q9UK61	1.96
K.C*LLASTYLAR.L	Q9UPU5	1.52		R.YVC*EGPSHGGLPGASSEK.N	P19838	2.16		R.IVDTPC*NEMNTDTFLEEINKVGK.E	Q8NDH3	1.96
R.RFSFC*CSPEPEAEAEAAAGPGPCER.L	Q13501	1.52		R.AENGLLMTPC*YTANFVAPEVLK.R	P51812	2.15		R.SASKTGC*DVQER.V	Q9BVQ7	1.96
R.RFSFCC*SPEPEAEAEAAAGPGPCER.L	Q13501	1.52		R.CQQC*QAEAK.C	P29590	2.15		R.AAC*FAIQK.G	O15269	1.95
K.SFLTPC*C*SLETPVDSQLYR.Y	Q14CZ7	1.51		R.SQLELLISPTC*SC*K.Q	Q29RF7	2.15		R.C*VPQDTGFSSLFLK.V	Q8N201	1.95
R.QRDRDDRDFDFC*R.E	Q9UPN6	1.51		K.TIGGGDDSFTTFFC*ETGAGK.H	P68366	2.15		K.TKDSTFDLPADSIAPFHIC*YYGR.L	Q8N1G2	1.95
K.LSDFGLC*TGLK.K	Q15208	1.5		R.AYEYVEC*PIR.G	P53701	2.15		K.IIPDC*NADNSK.T	Q15853	1.95
K.LSDFGLC*TGLK.K	Q9Y2H1	1.5		R.TDFQQGC*AK.T	O95571	2.14		R.QLPSLAC*K.Y	P42166	1.95
R.SRQDPGTDRTEDSGLAAGPPEAAGENFAPC*SVAPGK.S	Q96CP2	1.5		K.IC*MNEDPAK.R	Q13418	2.14		K.SLDDSQC*GITYK.M	Q9NVG8	1.95
R.KIVEAC*K.A	Q9NT62	1.5		R.LLALTSSDLGC*QPSRT.-	Q8IY95	2.14		K.GNTAEGC*VHETQEK.Q	Q9BQG0	1.94
R.C*KWTEPYCVIAAVK.I	Q17RY6	1.5		R.SFLAGGIAGC*C*AK.T	P16260	2.14		R.C*RDDSFFGETSHNYHKFDSEYER.M	P43243	1.94
R.RDC*QEQAK.I	P12270	1.5		R.TSC*GSPNYAAPEVISGR.L	P54646	2.13		R.FAGQMAALC*SR.D	Q9NXE4	1.94
R.HAAQC*VGR.A	P18074	1.5		R.TSC*GSPNYAAPEVISGR.L	Q13131	2.13		R.C*SLLPVVNNSGAIC*NSWK.L	Q9ULK4	1.94
R.VNDFETADILC*PK.A	Q9BZD4	1.5		R.C*VDKSWIPEGVVR.S	P51159	2.13		R.QC*VLSTLAQLLLDKDC*TVLVGR.Q	Q9NU22	1.94
K.LRSDC*ESQECVTK.L	Q9NS86	1.5		K.VKNVTQIEPFC*LETDRR.G	Q9ULW0	2.12		K.AKVDEFPLC*GHMVSDEYEQLSSEALEAAR.I	P27635	1.94
K.TSC*ALTIHAIGR.Y	Q5VYK3	1.49		K.AGKPPC*GATKR.S	Q9BY42	2.12		R.VLVQMC*K.M	Q70J99	1.94
K.RVPQC*PSGR.V	Q16186	1.49		R.KNASC*GTR.S	P60468	2.12		K.SQIC*DNAALYAQK.Y	P55060	1.93
R.C*SCSFR.V	Q9H3K6	1.49		K.ATSITVTGSGSC*R.H	Q14118	2.12		R.TIQFVDWC*PTGFKVGINYQPPTVVPGGDLAK.V	Q71U36	1.93
R.KFPYC*EATLLQQLVR.S	Q8IV38	1.49		K.C*MLDAALATLNTHGK.E	Q92616	2.12		K.C*NEQPNRVEIYEK.T	Q7L576	1.93
R.QAEEIYENIPGLC*K.T	O60518	1.49		R.HGRPPPC*K.K	Q9C0D3	2.12		K.C*NEQPNRVEIYEK.T	Q96F07	1.93
R.WMYTGGEDC*TAR.I	Q9BVC4	1.49		K.SGDAAIVEMVPGKPMC*VESFSQYPPLGR.F	Q05639	2.11		K.IWTAHYDPGHC*FAESR.E	Q9H553	1.93
K.TLELLVC*R.V	Q9BXW9	1.48		R.VVC*SSGAVGNYSGGLAVKEWLLAHEGHR.L	P16455	2.11		K.SNLQNC*SK.F	Q15054	1.93
R.ASC*TSSTSGSKR.N	P13807	1.48		R.GALLYMYC*HSLTK.R	A6NDU8	2.11		K.VTTC*GTDVIALTK.Q	Q96B45	1.93
R.AEDQTESSC*ESHR.K	Q9BU76	1.48		R.KC*PFYAAEQDKGALEGSSC*PFR.T	P30519	2.11		K.KIEQC*DYPPLPSDHYSEELR.Q	Q8TDX7	1.92
R.GLINLGNTC*FMNC*IVQALTHTPLLR.D	Q9UPT9	1.48		R.DDFLGSFC*R.Y	Q9NXE4	2.11		R.GVPGPFLVC*GPLSTLPNWMAEFK.R	Q9NRZ9	1.92
R.GMPETTQPDKQC*GQVAAAAAAQPPASHGPER.S	O95817	1.48		K.QFLDFGRDNAC*EK.T	Q15120	2.11		R.TFVPAMTAIHGPPITAPVVC*TR.K	Q96RN5	1.92
R.LGLHQQGSEPSYLDRTEQLQAVLC*STMEK.S	Q9BV38	1.48		R.YNFFTGC*PK.A	Q99832	2.11		K.AGVVIHC*NHR.I	Q9H8P0	1.92
K.GMTSLQC*DC*TEKLQNKFDFLR.S	Q9BTE7	1.47		K.SC*SGVEFSTSGSSNTDTGK.V	P45880	2.11		K.MAPPDLPHWQDC*HELWSK.K	Q9NYV4	1.92
R.VGIIPPKGC*LLYGPPGTGK.T	P62333	1.47		K.LYGSLPLC*VLLER.A	Q9Y256	2.1		K.QLVPASGLTVMDLEAEGTC*LR.F	Q6P996	1.92
R.EAVC*FIPGEGHTLQEHQIVLVEGGR.T	O15235	1.47		K.C*PFYAAEQDKGALEGSSC*PFR.T	P30519	2.1		R.ELLDLHKQPTSEANC*SAMFGK.L	Q29RF7	1.92
R.LSNC*ANR.T	O60502	1.47		R.KC*VPSVVVGVVGMGHVPGIEK.N	Q9H4I3	2.1		R.VLGPAAC*R.N	Q7Z6Z7	1.92
R.KPVVC*GVSSLGIDHTSLLGDTVEK.I	Q05932	1.47		K.ISSNC*PK.A	P10398	2.1		R.C*PIQLNEGVSFQDLDTAK.L	A6NDU8	1.91
K.YVQEDSC*QHGVYGR.L	Q9C0I1	1.47		R.QVVSELAEC*VR.D	P57678	2.1		R.C*RDDSFFGETSHNYHK.F	P43243	1.91
R.DC*QIAHGAAQFLR.E	P30876	1.47		R.TC*WPTDLEEAK.A	Q9HAV4	2.1		K.AMLTLNNC*R.E	Q9BXW9	1.91
R.KKC*PSTHSEELHDCIQK.T	P48507	1.46		R.TFVPAMTAIHGPPITAPVVC*TR.K	Q96RN5	2.1		R.ATGHSGGGC*ISQGR.S	Q9HA64	1.91
R.DAC*DGHEIGR.M	Q92621	1.46		R.TMC*PLLSMKPGEYSYFSPR.T	Q15003	2.1		K.GSPC*SEEAGTLR.R	Q9NVI1	1.91
R.LLQEIVDQC*MNR.S	O15269	1.46		K.SGEEDFESLASQFSDC*SSAK.A	Q13526	2.1		K.KPLKPCC*ACPETK.K	Q14061	1.91
R.LPLALPPASQGC*SSGGGGGGGGGSSAGGSGNSRPPR.N	Q9NZL4	1.46		R.SQKPEAGGC*GAPAAR.E	O60343	2.09		K.QPTSEANC*SAMFGK.L	Q29RF7	1.91
R.LLKPMC*QENLPIEAVYHR.Y	Q9NVX0	1.46		K.MEAAGFTISGASHPIC*PVMLGDAR.L	O75600	2.09		R.RFSFC*CSPEPEAEAEAAAGPGPCER.L	Q13501	1.91
K.GIVDC*IVR.I	P12236	1.46		K.AGKPPC*GATK.R	Q9BY42	2.09		R.RFSFCC*SPEPEAEAEAAAGPGPCER.L	Q13501	1.91
K.NASC*GTR.S	P60468	1.45		R.TLQC*LNAVR.T	Q5SRE5	2.09		R.NALQHC*YWK.Y	Q9NRZ9	1.91
R.C*EMASTGEVAC*FGEGIHTAFLK.A	P31327	1.45		K.VVVFIKPTC*PYCRR.A	P35754	2.09		K.TDIQIALPSGC*YGR.V	P33316	1.9
R.KC*VPSVVVGVVGMGHVPGIEK.N	Q9H4I3	1.45		R.ESSYAC*YYDEKR.S	Q99538	2.08		R.LLQNC*NDDSLNVALPMR.M	Q15386	1.9
K.ISGPNPLSC*LK.K	Q9BRU9	1.45		R.KGDSNANSDVC*AAALR.G	Q8IZL8	2.08		R.VVC*SSGAVGNYSGGLAVK.E	P16455	1.9
R.VMGIVENMSGFTC*PHCTECTSVFSR.G	Q9Y5Y2	1.45		K.GMQTQSAEC*LVIGQIACQK.L	P57772	2.08		K.AAADGDRDC*VLQK.S	Q96D53	1.9
R.VMGIVENMSGFTCPHCTEC*TSVFSR.G	Q9Y5Y2	1.45		K.SEMVPSC*PFIYIIR.K	Q9BW27	2.08		K.LLTEC*PPMMDTEYTK.L	P55060	1.9
R.VVLLGEFLHPC*EDDIVCK.C	Q9NY12	1.45		R.LAVLMEAQC*R.Q	Q9Y4R8	2.07		K.AC*QGQYETIER.L	H7C1Q1	1.9
R.QAEEEC*AHR.G	Q9H147	1.45		K.APPTAC*YAGAAPAPSQVK.S	P17676	2.07		K.AC*QGQYETIER.L	Q9BXI6	1.9
K.LC*SLLDSEDYNTC*EGAFGALQK.I	Q92973	1.44		K.DAYC*C*AQQGK.R	Q9NR33	2.07		R.IC*RPLLIVEK.Q	P30876	1.9
R.LSLLEEYGCC*K.E	P53350	1.44		R.LTAPPAAFLC*HLDNLLRPLLK.D	Q9H9Q4	2.07		R.LAAPDPC*DPQRWC*HR.V	O60831	1.9
R.KGIC*EYHEK.N	Q9Y2Z0	1.44		K.C*MLDAALATLNTHGKENVNSLLPVFEEFLK.N	Q92616	2.07		K.QGFGNLPIC*MAK.T	P11586	1.9
R.ILPNLSC*MFALLLADR.S	Q9NSG2	1.44		R.C*SDNSSYEEPLSPISASSSTSR.R	Q8IXK0	2.06		K.NAGNC*LSPAVIVGLLK.E	O43175	1.89
R.IVQNC*GTEK.E	Q6P4Q7	1.44		K.AC*VVHGSDLKDMTSEQLDDILK.Y	P05023	2.06		R.AHEC*LGEALR.V	Q92619	1.89
R.IVQNC*GTEK.E	Q9H8M5	1.44		R.KKDDDTSTC*K.T	Q96QE3	2.05		K.GGTPVC*K.K	Q69YH5	1.89
R.QDC*FNMAQGFR.T	Q9Y6K5	1.44		K.KQTLC*LQAQREEK.A	Q641Q2	2.05		K.MC*SMVK.K	P61247	1.89
K.ADTSQEIC*SPR.L	P52948	1.43		K.SSSLNFSFPSLPTMGQMPGHSSDTSGLSFSQPSC*K.T	O60563	2.05		K.NLC*YANTINWK.K	P00533	1.89
K.C*VLTHSPTWIIDPIDGTC*NFVHR.F	O14732	1.43		R.SITC*WTLSR.Y	Q92973	2.04		K.TNVALMC*MLR.E	O75643	1.89
R.VASMAQSAPSEAPSC*SPFGK.K	Q00013	1.43		R.C*PADNPGLVQAQPR.V	Q68CZ2	2.04		K.QALPC*VAESPTVHVEVHQR.G	Q15645	1.88
R.VLDALFPC*VQGGTTAIPGAFGC*GK.T	P38606	1.43		R.VVEDLPHGFLTLAALC*R.E	Q05469	2.04		K.IVDGAC*LNHFTR.I	O60921	1.88
R.SATYC*EQLLQHVQAVPATQ.-	Q86Y56	1.42		K.SLIDNFALNPDILC*SAKR.L	Q5UIP0	2.03		R.VMTIPYQPMPASSPVIC*AGGQDR.C	Q15365	1.88
K.KIC*SHSAPEQQAR.T	O75683	1.42		R.DTC*EHSSEAK.A	Q9BWW4	2.03		R.FGLESHAHTIQIC*K.L	Q8NE71	1.88
K.SC*SGVEFSTSGSSNTDTGKVTGTLETK.Y	P45880	1.42		K.GLAAAEPTANGGLALASIEDQGAAAGGYC*GSR.D	Q15758	2.03		K.FYAPWC*GHCK.T	Q8NBS9	1.88
R.IC*IDPWLLDHR.T	Q8NC42	1.42		K.QGNC*YLAALNC*LR.L	Q12769	2.03		K.HLGGIPWTYAEDAVPTLTPC*R.F	P31930	1.88
R.IFGSIPMQAC*QQK.D	Q6NZY4	1.42		K.C*EQDREPLR.T	Q9HB19	2.02		R.LC*TLALHVLPNSSIGILATTR.I	Q8WTT2	1.88
R.RSQKPEAGGC*GAPAAR.E	O60343	1.42		K.SSSSSSASAAAAAAAASSSASC*SR.R	Q07065	2.02		K.SC*QVENGR.V	Q9NR56	1.88
R.NKPFFDIC*TSR.K	O60942	1.42		R.MAVPTC*LLQMK.I	Q9P000	2.01		R.TGEPC*VAELTEENFQR.L	Q8IUD2	1.88
R.TC*PQDHK.L	Q9Y234	1.42		K.GVPVSEAEC*TAMGLR.S	Q5VT66	2.01		R.GC*PQANR.G	Q8IVT2	1.87
R.LKPDPEPDDKNQEPSSC*K.S	Q9GZU8	1.41		K.GVPVSEAEC*TAMGLR.S	Q969Z3	2.01		R.YGDSEFTVQSTTGHC*VHMR.G	P52597	1.87
R.GNYSTDQLC*VLDNVK.M	Q7Z4Q2	1.41		R.TAC*TNFMMTPYVVTR.Y	P45984	2.01		R.GSSSYSQLLAATC*LTK.L	Q9UIA9	1.87
R.EC*GNAHYQR.A	Q14318	1.41		R.AC*SVGAVPGITK.F	Q9NVN8	2.01		R.KNASC*GTR.S	P60468	1.87
R.FDPTQFQDC*IIQGLTETGTDLEAVAK.F	Q7L1Q6	1.41		R.YLKDEQLC*R.L	Q5VWQ0	2.01		R.SKC*EELSGLHGQLQEAR.A	Q9P2E9	1.87
K.KGGNC*DLSHQER.L	Q9H410	1.41		K.MPC*ESSPPESADTPTSTR.R	P46013	2.01		R.C*QADQAR.L	Q7Z4H7	1.87
K.GKDITTKHDEVVC*GR.K	O14730	1.41		K.QVGC*AFDMLWK.L	Q53R41	2		K.DINAYNC*EEPTEKLPFPIIDDR.N	P30041	1.87
K.LLGPGVNYSGC*QITWAK.F	P40763	1.41		K.GKDITTKHDEVVC*GR.K	O14730	2		K.LC*RPC*QAAVEYYIK.H	Q5SNT2	1.87
R.NDSPTQIPVSSDVC*R.L	Q8TC07	1.41		K.AFQYVETHGEVC*PANWTPDSPTIKPSPAASK.E	P30048	2		K.SALC*NADSPKDPVLPMK.F	Q29RF7	1.87
K.NSSC*GGGISSSSSSR.G	Q9BXB4	1.41		K.HC*SQVDSVR.G	Q14247	2		K.EADASPASAGIC*R.I	Q9BW27	1.86
K.YKVC*NYGLTFTQK.W	Q9Y277	1.41		K.ISGPNPLSC*LK.K	Q9BRU9	2		K.AVQGC*GAHPAIR.M	P21359	1.86
K.VGVGTC*GIADKPMTQYQDTSKYNVR.H	O75940	1.4		K.VFFIQAC*QGDNYQK.G	Q14790	2		R.EAAC*AQNFR.Q	Q96D53	1.86
R.NPC*TEQILK.L	Q9HAV4	1.4		K.YSSVSEPAKVSEC*C*R.F	Q9Y263	2		K.SLQTLAMAVASQNAVLLEGPIGC*GK.T	Q9NU22	1.86
K.C*PICVPC*GLR.L	Q9HAV4	1.4		R.YYC*LNVPLRDGIDDQSYK.H	O15379	2		R.TLLVNC*QNK.S	Q8TC07	1.86
K.LIIVEGC*QR.Q	P05023	1.4		R.CASC*PYLGMPAFKPGEK.V	Q6FI81	1.99		R.TTLIIC*PLSVLSNWIDQFGQHIK.S	Q14527	1.86
R.SNAALALQLAHC*WLQR.Q	Q05932	1.4		K.SLLNQC*IEER.Y	Q96GM8	1.99		K.TLELLVC*R.V	Q9BXW9	1.86
K.GNTAEGC*VHETQEK.Q	Q9BQG0	1.4		K.KYVSVC*EGPLKEQEWNTTNAK.Q	A6NDU8	1.99		K.GEETPVIVGSALC*ALEGRDPELGLK.S	P49411	1.85
R.AYGVC*FVDTSLGK.F	P52701	1.4		K.NRLDIFC*C*VR.G	O15118	1.99		R.GVVPVVMDC*ESTVQEK.A	P42695	1.85
K.C*LEPTVALLR.W	Q8TCG1	1.4		R.SVVC*QESDLPDELLYGR.A	Q9NS86	1.99		R.KC*VPSVVVGVVGMGHVPGIEK.N	Q9H4I3	1.85
K.QVSC*MAHR.G	A0PJW6	1.4		R.TTDYDLVGGDQLNC*HFGSILHTTGLQYR.D	Q8NCG7	1.99		K.QDSVQC*ER.K	P13056	1.85
K.YMLDC*R.T	Q9Y277	1.4		R.VHIPNDDAQFDASHC*DSDKGEFGGFGSVTGK.I	Q16576	1.99		R.YTVYC*SLIK.V	Q7L2H7	1.85
R.KNASC*GTR.S	P60468	1.4		K.SC*AFAMGHLVR.T	Q5VYK3	1.98		K.NASC*GTR.S	P60468	1.85
K.NC*GCLGASPNLEQLQEENLK.L	P54136	1.39		R.KQQNEVSSC*IPK.I	Q9NVX0	1.98		K.SAC*GNCYLGDAFR.C	Q6FI81	1.84
K.NCGC*LGASPNLEQLQEENLK.L	P54136	1.39		K.FLTPC*YHPNVDTQGNIC*LDILK.E	O00762	1.97		K.TFVGTPC*WMAPEVMEQVR.G	O95747	1.84
K.C*GYAGSNFPEHIFPALVGRPIIR.S	P61160	1.39		R.NLVQC*GDFPHLLVYGPSGAGKK.T	P40938	1.97		K.TFVGTPC*WMAPEVMEQVR.G	Q9UEW8	1.84
K.C*IVNNVSAETVQTVR.Y	Q8N0X7	1.39		K.ETTNIFSNC*GC*VR.A	Q9UBB4	1.97		R.ADVYRDILAC*GR.G	Q9UDY2	1.84
R.EVC*LASER.S	P52701	1.39		R.C*INFTR.V	Q9H6X2	1.97		K.YLLADC*NEAFIK.I	O60216	1.84
K.VLVVSVC*PQSLPYFAAK.F	Q9UHQ1	1.39		R.C*RELPAQK.W	P08195	1.97		K.WFPEVTHFC*R.G	Q9HBH0	1.84
R.VVC*SSGAVGNYSGGLAVK.E	P16455	1.39		K.AAADGDRDC*VLQK.S	Q96D53	1.97		R.WKQSVELC*K.K	Q00610	1.84
K.DYEFMWNPHLGYILTC*PSNLGTGLR.A	P12277	1.38		R.ELALEC*DYQR.E	Q8NI60	1.97		K.EQSQPC*ADNAVLSSGLTAAR.-	P19784	1.84
K.AC*ESASHDNQSVR.M	Q8TBZ6	1.38		K.SC*AVSNLKK.V	Q3SY69	1.97		R.VRLPDGC*LLQGTFYAR.E	Q9BZV1	1.84
R.AYIC*AHPLDR.T	Q9H845	1.38		R.ELGGC*SQAGNR.H	O95081	1.97		R.TMC*PLLSMKPGEYSYFSPR.T	Q15003	1.84
K.C*AAPRPPSSSPEQR.T	Q5H9R7	1.38		R.C*VELVHEEMQR.I	O00429	1.96		K.VSLTPDFSAC*R.A	Q8N0V3	1.84
K.LKDLNC*PFLEGLYITEPK.T	Q99871	1.38		R.LTEGC*SFR.R	P42677	1.96		R.VC*ENIPIVLCGNK.V	P62826	1.83
K.LLSALC*PEEPPVHSSAQIVSK.H	Q9NR50	1.38		R.LTEGC*SFR.R	Q71UM5	1.96		K.NNQESDC*VSK.K	A6NDG6	1.83
R.NQC*KDLPK.S	Q9NVC6	1.38		R.GKRPLSEC*QEGK.V	Q9H0K6	1.96		R.EAMC*PGVSGEDSSLLLATQVEGQATNLQR.L	P14923	1.83
K.TKSC*SGVEFSTSGSSNTDTGK.V	P45880	1.38		R.QKSWWDAVC*TLIHR.K	P49792	1.96		R.FSFC*C*SPEPEAEAEAAAGPGPCER.L	Q13501	1.83
K.SYMAQMDQELAHTC*ISK.S	O95905	1.38		R.QKSWWDAVC*TLIHR.K	Q99666	1.96		K.GPGLFFILPC*TDSFIK.V	P27105	1.83
R.QDPGTDRTEDSGLAAGPPEAAGENFAPC*SVAPGK.S	Q96CP2	1.38		K.YVSVC*EGPLKEQEWNTTNAK.Q	A6NDU8	1.96		K.MFFIQAC*R.G	P42575	1.83
R.TSAC*GLFSVC*YPR.V	P30153	1.38		K.ETAAAC*VEK.-	Q15631	1.95		R.QLC*LRPDVDNHWALR.D	P49848	1.83
R.TSAC*GLFSVC*YPR.A	P30154	1.38		K.WC*EYGLTFTEK.W	P45880	1.95		R.VGMGSGSIC*ITQEVLACGRPQATAVYK.V	P12268	1.83
K.VDASAC*GMER.L	O95671	1.38		K.FNPEAGANC*LVK.Y	O14777	1.95		R.WC*AVQGQVDEK.T	Q5VY80	1.83
R.FSFCC*SPEPEAEAEAAAGPGPCER.L	Q13501	1.38		R.SC*NQASQR.S	Q92545	1.95		R.WC*AVQGQVDEK.T	Q6H3X3	1.83
K.YKWC*EYGLTFTEK.W	P45880	1.37		K.WADNFMAEGC*GGSK.E	Q8N357	1.95		R.WC*AVQGQVDEK.T	Q9BZM5	1.83
R.GDSEPTPGC*SGLGPGGVR.G	Q8WW01	1.37		R.EAC*EHSGEAK.A	Q9BWG4	1.94		K.WC*EYGLTFTEK.W	P45880	1.83
K.SSVHQPGSHYCQGC*AYKK.G	Q9P021	1.37		K.C*AAPRPPSSSPEQR.T	Q5H9R7	1.94		K.LPLFSSC*QIQQLMKEPVLQDK.R	Q9Y4B6	1.82
R.IKNC*LNPQFSK.T	O75131	1.37		K.LVSPLC*LAPYFR.L	Q9BXW9	1.94		K.FLTPC*YHPNVDTQGNIC*LDILK.E	O00762	1.82
R.NALANQSDC*VLHR.I	Q9UJX3	1.37		K.QLC*EDWEVVPEPVAR.W	P27707	1.94		R.ELC*HTQSSHASLR.A	Q9P2E9	1.82
K.MKPDIVC*IPDDADMGTADSLR.Y	Q9NR50	1.37		R.SRGEEQGC*QGDGDAGVK.A	Q13671	1.93		R.SGQGAFGNMC*R.G	P36578	1.82
R.KVAEPELMGTPDGTC*YPPPPVPR.Q	P27708	1.37		K.SAC*GNCYLGDAFR.C	Q6FI81	1.93		K.GVLEC*KPGEASVFQQPK.T	Q96KP1	1.82
R.VVAAAFQSEDPADPC*ALLQR.R	Q8N8A6	1.37		K.SVAAGC*PVLLGKDNPSPGPSR.D	Q9NQS1	1.93		K.LWNEWC*R.T	O95456	1.82
R.LALEDGC*GPGPGPPR.E	Q96LD4	1.36		K.GKEFEFSQLPLKVEFLEC*SAK.G	Q9Y5M8	1.92		K.MAEGGSGDVDDAGDC*SGAR.Y	Q9UH62	1.82
K.AALDC*STSHLDEFYSDPHAVAGALK.S	Q68EM7	1.36		K.GYWASLDASTQTTHELTIPNNLIGC*IIGR.Q	Q15365	1.92		R.FGRDLNYC*FSGMSDHR.Y	P31943	1.81
R.EHQLASASELPLGSRPAPQPPVPRPEHC*EGAAAGLK.A	O60232	1.36		R.QLLILLQNC*TDEGEREAIQK.S	Q969H6	1.92		R.FGRDLNYC*FSGMSDHR.Y	P55795	1.81
K.TMDAGC*KPYMAPER.I	P46734	1.36		K.TSC*ALTIHAIGR.Y	Q5VYK3	1.92		R.EC*LLSAPR.K	Q86XI2	1.81
R.SDMICGYAC*LK.G	P42575	1.36		K.TYSEC*EDGTYSPEISWHHR.K	P48651	1.92		R.VFANAPDSAC*VIGLK.K	P17858	1.81
R.DLAYC*VSQLPLTER.G	Q15021	1.36		K.WFVPWGPNHC*DK.I	Q5T9L3	1.92		R.SGRPAC*QK.A	Q9Y4P3	1.81
R.GRDLEQILSQYITFVKPAFEEFC*LPTKK.Y	Q9BZX2	1.36		K.AVETVHNLC*C*NENK.G	Q8IXH7	1.91		R.AIVDC*GFEHPSEVQHEC*IPQAILGMDVLCQAK.S	O00148	1.81
K.AAGAPGAACRPGC*SQK.L	O95685	1.36		R.LAAPDPC*DPQRWC*HR.V	O60831	1.91		R.AIVDC*GFEHPSEVQHEC*IPQAILGMDVLCQAK.S	Q13838	1.81
R.YGDSEFTVQSTTGHC*VHMR.G	P52597	1.36		R.MPNQHAC*K.L	Q9NVI1	1.91		R.EHQLASASELPLGSRPAPQPPVPRPEHC*EGAAAGLK.A	O60232	1.81
K.VDEFPLC*GHMVSDEYEQLSSEALEAAR.I	P27635	1.36		K.QETHC*QSTPLKK.H	Q9NQW6	1.91		K.QFTPC*QLLADHANSPNK.K	P40939	1.8
R.LIAGC*IGKPLGEQFR.K	Q9HAV4	1.36		K.HGEVC*PAGWKPGSDTIKPDVQK.S	Q06830	1.9		R.IEEEHLWEC*K.Q	Q5VZL5	1.8
K.KKSVLC*STPTINIPASPFMQK.L	Q96KB5	1.35		K.KC*PTEYQEK.M	Q68DH5	1.9		K.ALGWAAVYLSTC*K.D	O15533	1.8
K.GVC*DQSFGIHVAELANFPK.H	P43246	1.35		R.FC*PFAER.T	P78417	1.9		R.IDC*FSEVPTSVFGEK.L	O00567	1.8
K.HGEVC*PAGWKPGSDTIKPDVQK.S	Q06830	1.35		R.KLC*AYPR.L	Q9Y6I9	1.9		R.C*NNNWVVR.H	O15344	1.8
R.MHSVGIC*GSDVHYWEYGR.I	Q00796	1.35		R.KLSYAEVC*QKPPKEPSSVLVQPLR.E	Q71RC2	1.9		R.DLAYC*VSQLPLTER.G	Q15021	1.8
R.RHAC*SSIIK.M	Q9HAV4	1.35		K.TKSC*SGVEFSTSGSSNTDTGK.V	P45880	1.9		R.KGPHC*ERPLTQEELLR.E	Q15906	1.8
K.TIGGGDDSFTTFFC*ETGAGK.H	P68366	1.35		K.ILTAALTC*PK.T	Q5VZ89	1.89		K.QLSSC*LPNIVPK.L	Q92616	1.8
R.HIQQVDC*SGNDLEQLHIK.V	P52948	1.35		K.AAPQPSVSC*VYKR.S	P38435	1.89		K.TFLC*LR.I	Q8WTT2	1.8
R.IC*ANKYMVK.S	P27635	1.35		K.C*IVSVAGGATR.A	Q96GQ5	1.89		R.TGLC*YLPEELAALQK.L	Q13045	1.8
K.IGLPILC*VGSVWK.S	Q9UJ70	1.35		R.LC*GTDEK.I	Q63HN8	1.89		K.TMDAGC*KPYMAPER.I	P46734	1.8
K.RPACTLKPEC*VQQLLVCSQEAK.K	P32320	1.35		R.YSTGSDSASFPHTTPSMC*LNPDLEGPPLEAYTIQGQYAIPQPDLTK.L	Q15366	1.89		K.VDASAC*GMER.L	O95671	1.8
K.SQC*ALEEYVR.S	P24468	1.35		R.SVSSSVQVC*PEVGKR.N	Q8IXW5	1.88		R.KMLDPGLMTC*SK.Q	Q03701	1.79
R.TC*NMTVLSMLPTLR.E	P56589	1.35		K.RLIPDGC*GVK.Y	P27635	1.88		R.LSAPGC*WAAC*TNFSR.T	Q04941	1.79
K.TTC*MSSQGSDDEQIKR.E	Q9P0V9	1.35		K.LLTEC*PPMMDTEYTK.L	P55060	1.88		R.DAGSRDEKAEAGEAGQATAEAEC*HR.T	O95671	1.79
K.VIIVQAC*R.G	P49662	1.35		R.GDGQFFAVSVVC*PETGAR.K	O95163	1.88		R.DC*GNQAVEER.L	Q9NS73	1.79
K.VIIVQAC*R.G	P51878	1.35		R.NLISVGC*PITK.T	Q5T5D7	1.88		R.FIC*GTQSIHK.N	O75600	1.79
R.LSFLKEDSQSC*R.V	Q96T76	1.34		R.QC*VLSTLAQLLLDKDC*TVLVGR.Q	Q9NU22	1.87		R.SRGEEQGC*QGDGDAGVK.A	Q13671	1.79
K.NC*GC*LGASPNLEQLQEENLK.L	P54136	1.34		R.AYCHILLGNYC*VAVADAKK.S	Q9Y2Z0	1.87		R.GHVLC*R.T	Q96SZ6	1.79
K.FYAPWC*GHC*K.T	Q8NBS9	1.34		R.C*EMASTGEVAC*FGEGIHTAFLK.A	P31327	1.87		R.GLLC*LGNVISALGDDKKGGFVPYRDSK.L	O95239	1.79
K.SEMVPSC*PFIYIIR.K	Q9BW27	1.34		R.DAPFQLETC*PLTTVDALVLR.F	Q9NX61	1.87		K.IIYEQEGVYIHSSC*GK.T	Q8TC07	1.79
R.C*QQPAVIFIDEIDSLLSQR.G	Q6PIW4	1.34		K.IC*PMEHILVR.L	Q86XI2	1.87		R.NPVHC*FDLASLDPR.V	O43159	1.79
R.FLEQQTLC*NNQVNDLTTALK.E	Q9Y448	1.34		K.NADMSEEMQQDSVEC*ATQALEKYNIEK.D	P63167	1.86		R.QLTIC*NMLQGATELVAEPNRR.V	Q15345	1.79
R.GIYSQLETLIC*SR.S	Q8N1F8	1.34		R.ILSDTTLWLC*R.I	Q6P996	1.86		R.SEVEEVDFAGWLC*K.T	P36507	1.79
R.LLAENEDVVVVDKPSSIPVHPC*GR.F	Q8IZ73	1.34		K.AAQGPPAPAVPPNTDVMAC*TQTALLQK.L	O60232	1.86		R.EKVGEC*EASAMLPLEC*QYLNK.N	Q9H3P2	1.79
R.RTDPEC*TAPIKK.Q	Q8N1G2	1.34		K.LSTAC*PGR.V	P55060	1.86		K.FVPYLIAGIQHSC*QDIGAK.S	P12268	1.78
K.LTTPTYGDLNHLVSATMSGVTTC*LR.F	Q9BVA1	1.34		K.VC*NYGLTFTQK.W	Q9Y277	1.86		K.NADMSEEMQQDSVEC*ATQALEKYNIEKDIAAHIK.K	P63167	1.78
R.KNEGSC*GPAR.I	Q9NQZ5	1.33		R.EC*GNAHYQR.A	Q14318	1.85		R.QASLADC*LNHAVGFASR.T	O43592	1.78
K.ARPPQHC*LKEEELER.K	O43688	1.33		R.AAQLEPITYMQGLSAC*EQIR.A	Q9HBH0	1.85		R.SITC*WTLSR.Y	Q92973	1.78
K.C*DPRHGK.Y	P68366	1.33		K.AVLVTGC*DSGFGFSLAK.H	Q02338	1.85		R.RC*LPLSMDVR.A	Q9NUI1	1.78
K.C*DPRHGK.Y	Q71U36	1.33		R.RHAC*SSIIK.M	Q9HAV4	1.85		R.MTIGHLIEC*LQGK.V	P30876	1.78
R.GSVHSAC*SSEHK.G	P48553	1.33		R.NHLLPDIVTC*VQSSR.K	Q9BSD7	1.85		K.QADIC*VR.E	Q29RF7	1.78
K.MCDNC*CK.D	P46063	1.33		R.SASYPC*AAPRPGAPETTALHGGFQR.R	Q7Z3C6	1.85		R.SLLC*GEDEAADENPESQEMLEEQLVR.M	Q9HAV4	1.78
K.MPC*QSLQPEPINTPTHTK.Q	P46013	1.33		K.SSVC*AK.I	Q9BZX2	1.85		R.GLLC*LGNVISALGDDKKGGFVPYR.D	O95239	1.78
R.TKPWQC*LSVR.T	P57081	1.33		K.SVLYGNLGAASC*TLQGPQFGSHG.-	Q8N0Z8	1.85		R.TIQFVDWC*PTGFK.V	Q71U36	1.78
R.TC*WPTDLEEAK.A	Q9HAV4	1.33		K.TVFEALQAPAC*HENMVK.V	O95782	1.85		K.C*LEELQKR.F	P49721	1.77
K.VIPTEC*AIK.V	O14730	1.33		K.TAVC*DIPPR.G	Q9BVA1	1.84		K.SWMEGLTLQDYSEHC*KHNESVVK.E	O00487	1.77
K.KLTGIKHELQANC*YEEVK.D	P23528	1.32		R.C*IECNQEAK.E	Q9H2C2	1.84		R.QTGHQC*GMSEK.A	Q6UWU4	1.77
R.WC*SWSLSQAR.L	P08195	1.32		K.QVVEEPSPQLPADRFSPEFVDFTAQC*LR.K	P46734	1.83		R.LAPILC*DGTATFVDLVPGFR.R	O43264	1.77
K.C*MIDQAHQEERPIR.Q	Q9UBQ5	1.32		R.EVC*LASER.S	P52701	1.83		R.TFC*NC*FVGQAGQK.L	Q9Y263	1.77
R.C*LVAGLLSPR.F	Q8WYP5	1.32		K.C*NAEEHVR.V	P11279	1.83		K.LC*SLLDSEDYNTC*EGAFGALQK.I	Q92973	1.77
K.GVVLC*TFTR.K	O15235	1.32		R.FQAEC*PHLCETSLAGR.A	Q99956	1.83		R.C*LADAVVK.I	Q5TGZ0	1.77
R.LKNC*GCLGASPNLEQLQEENLK.L	P54136	1.32		K.LLGPGVNYSGC*QITWAK.F	P40763	1.83		K.C*PYSVPFYPTFK.E	Q53GS7	1.77
R.LKNCGC*LGASPNLEQLQEENLK.L	P54136	1.32		R.TTSFAESC*KPVQQPSAFGSMK.V	P49841	1.83		K.QC*MMFSATLSK.D	O00148	1.77
K.NIDQC*SEIVK.C	Q92878	1.32		K.LIKGEAGQNLLEMMAC*DR.L	P49792	1.82		K.SC*AVSNLKK.V	Q3SY69	1.77
R.SGVVC*R.V	Q8N7H5	1.32		K.VTTC*GTDVIALTK.Q	Q96B45	1.82		R.TQEQC*VHNETK.N	O60313	1.76
K.SSVC*AK.I	Q9BZX2	1.32		R.FIC*GTQSIHK.N	O75600	1.82		K.TRPSSLESVTC*WR.A	Q15345	1.76
R.TC*GPEHSK.G	Q9NZT2	1.32		R.ESC*TAHAASQAATQR.K	Q9NYZ3	1.82		K.C*ASQSGMTAYGTR.R	Q99439	1.76
K.LIC*CDILDVLDK.H	P62258	1.31		R.FC*LIC*NYVSR.I	P35249	1.82		R.DSAQC*AAIAER.L	Q96RS6	1.76
R.ETEHC*VSLSLAQLSATIFRK.E	Q8TEX9	1.31		R.RPLQGVANQEPSNC*AAVAVGR.I	Q9UBZ4	1.82		K.KELC*ELKPK.F	Q9UHD1	1.76
K.KLMSSLPNFC*GIFNHLER.L	Q96PU8	1.31		R.IKNPFLSLAAC*VMPSR.L	Q92616	1.81		K.QSLLFC*PK.S	Q56VL3	1.76
K.ALC*DPLEEVR.E	Q92616	1.31		K.ESSGLVLLSSC*PQTASR.L	Q6P087	1.81		K.TIESIQLSPEEYEC*LKGK.I	O15091	1.76
R.VPAPSIEDIC*HVLSTVCKK.E	P40938	1.31		R.C*EFDSQASAPR.A	O43542	1.81		K.VNQC*VIGTAQANRK.-	Q9BW19	1.76
K.GSQMGTVQPIPC*LLSMPTR.N	Q9NZB2	1.31		R.NNSC*DSR.G	P33981	1.81		K.AGEGTYALDSESC*MEKLAALSASLAR.V	O00541	1.75
R.AESSQTC*HSEQGDK.K	P46063	1.31		R.RSQKPEAGGC*GAPAAR.E	O60343	1.81		R.FHADSVC*K.A	Q9BW61	1.75
R.DADADAGGGADGGDGRGGHSC*R.G	Q14657	1.31		K.ARQDC*VK.E	Q9HC98	1.81		K.DSDLATQNRPLWQC*FLGR.F	Q29RF7	1.75
K.FASHC*LMNHPDLAKDLTEYLK.V	Q29RF7	1.31		R.YTC*SEAQK.A	Q9NUW8	1.81		K.C*YSDAAAK.K	Q9Y446	1.75
K.FASHC*LMNHPDLAKDLTEYLK.V	Q9NTI5	1.31		K.C*ASQAGMTAYGTR.R	Q15417	1.81		K.LLGGFQETC*SK.A	Q9BVP2	1.75
R.LIGNESKGEHVPGFC*LPK.K	Q92616	1.31		K.AAGC*NIPVASVAAGFPAGQTHLK.T	Q9Y315	1.8		R.AHGHC*LHEIFLLR.E	O00116	1.75
R.AFQNTATAC*APVSHYR.A	Q9H814	1.31		K.AVLAASSPYFC*DQVLLK.N	O43298	1.8		R.AQQAC*IEAK.H	Q9UNE7	1.75
K.C*DAERENFHR.L	Q9H3U1	1.31		K.GNVDGVAATPTAASASC*QYR.C	Q9H2C2	1.8		K.GGEIC*EQLR.A	E7ERL9	1.75
R.C*FELDPAR.R	Q12834	1.31		K.IGDLTGYC*TNPNR.H	Q9NVN8	1.8		K.TILTLTGVSTLGDVKNNQESDC*VSK.K	A6NDG6	1.75
R.C*QDVSAGSLQELALLTGIISK.A	Q92621	1.31		K.SQC*ALEEYVR.S	P24468	1.8		K.KPPITVDSVC*LK.W	Q9H7Z6	1.75
R.EFSC*PFFETSAAYR.Y	Q92963	1.31		R.ESSYAC*YYDEK.R	Q99538	1.8		K.SC*SPLAFSAFGDLTIK.S	Q96EY5	1.75
R.NLVQC*GDFPHLLVYGPSGAGK.K	P40938	1.31		R.KKC*PSTHSEELHDCIQK.T	P48507	1.79		R.SLSPDC*GGSIEVMQSFLK.M	Q8NI36	1.75
K.AAASGQPRPEMQC*PAEHEEDMYR.A	Q96BN8	1.31		K.LTLPNGEPVPC*LLLANK.C	O14966	1.79		R.KTC*AAQLVSYPGK.N	Q09161	1.75
K.TGC*DVQER.V	Q9BVQ7	1.31		K.FGVEAFSDC*LR.Y	Q02338	1.79		K.YQSLGQC*VYVHC*K.A	Q8WUK0	1.75
R.KVAWSPC*GNYLASASFDATTCIWK.K	O76071	1.31		K.TTC*MSSQGSDDEQIKR.E	Q9P0V9	1.79		K.GNTAEGC*VHETQEKQK.A	Q9BQG0	1.75
R.VC*C*EGMLIQLR.F	Q96A33	1.31		K.AFSPGLPPQSC*SLNLK.Q	Q8N6M3	1.79		R.YYEKPC*R.R	P82921	1.74
K.WADNFMAEGC*GGSK.E	Q8N357	1.3		R.AGC*GHFGDR.L	Q9C0D5	1.79		K.NADMSEEMQQDSVEC*ATQALEK.Y	P63167	1.74
R.RPPEAC*EELR.L	Q86Y56	1.3		K.FYAPWC*GHCK.T	Q8NBS9	1.79		K.FASHC*LMNHPDLAKDLTEYLK.V	Q29RF7	1.74
K.TAVC*DIPPRGLK.M	I3L2F9	1.3		R.LQAPVLVAAPHSTFFDPIVLLPC*DLPK.V	Q643R3	1.79		K.FASHC*LMNHPDLAKDLTEYLK.V	Q9NTI5	1.74
K.TAVC*DIPPRGLK.M	Q3ZCM7	1.3		K.MTC*EYTWPNHLLGSDK.A	B0I1T2	1.79		R.AVC*MLSNTTAIAEAWAR.L	P68366	1.74
K.TAVC*DIPPRGLK.M	Q9BVA1	1.3		K.TAVC*DIPPR.G	I3L2F9	1.79		R.AVC*MLSNTTAIAEAWAR.L	Q71U36	1.74
K.KAC*QVTQSR.N	Q14919	1.3		K.TAVC*DIPPR.G	Q3ZCM7	1.79		R.AC*SNPSFLR.F	Q6N075	1.74
K.AVCGQC*ER.A	O15304	1.3		K.VADSELC*K.L	Q8TCG1	1.79		R.AVYC*IIGR.C	Q8N1F7	1.74
R.C*SLLDPFAAVR.R	Q86Y56	1.3		R.VLVQMC*K.M	Q70J99	1.79		R.EIGQKC*PQELSR.D	Q15021	1.74
R.GGDGPMC*RPVILLPEDTPPFLELK.G	P52701	1.3		K.AAPQPSVSC*VYK.R	P38435	1.79		R.GVPGPFLVC*GPLSTLPNWMAEFKR.F	Q9NRZ9	1.74
K.IFTTYLDLQTC*HVFSLPK.E	Q7L5N7	1.3		K.NASC*GTR.S	P60468	1.79		K.LASGEDDPFDSDFSC*PVK.L	Q99567	1.74
R.IGTSGGIGLEPGTVVITEQAVDTC*FK.A	Q16831	1.3		R.INPYMSSPC*HIEMILTEK.E	J3QL51	1.78		R.LIVDYSC*ALQR.D	Q3KR37	1.74
R.VLGRPITAHLC*TAK.S	Q9UHQ1	1.3		R.INPYMSSPC*HIEMILTEK.E	P18621	1.78		R.LTC*LFQIK.R	Q15386	1.74
R.SAGVQC*FGPTAEAAQLESSKR.F	P22102	1.3		R.IGLEGC*LC*QDFYR.I	Q9P2I0	1.78		K.NQC*LFTNTQCK.V	Q9UL40	1.74
K.SSNC*AASTEK.I	P13056	1.3		K.C*QLEINFNTLQTK.L	O43707	1.78		K.QSVELC*KK.D	Q00610	1.74
R.STFQAHLAPVVC*PK.Q	Q9P2X3	1.3		K.C*QLEINFNTLQTK.L	P12814	1.78		K.SPAESC*DLLGDIQTC*IRK.S	Q9BQG0	1.74
R.VC*FVTSMMTGR.A	Q86TG7	1.3		R.CLSDPAEGC*R.A	Q86Y56	1.78		K.LC*DFGISGQLVDSIAK.T	P45985	1.73
R.AKIVDGAC*LNHFTR.I	O60921	1.29		K.QVTSAEEC*K.Q	Q9Y5L0	1.78		K.ICNEILTSPC*SPEIR.V	Q9BPX3	1.73
R.TFVPAMTAIHGPPITAPVVC*TR.K	Q96RN5	1.29		K.ENFSLDWC*K.Q	P23919	1.78		K.AGSVELLGAMAYC*APK.Q	Q92616	1.73
K.VFDPQNDKPSKWWTC*FVKR.Q	O15145	1.29		K.C*YDALRK.M	P21953	1.78		R.EALQPHLAAIATELAQAHIC*QASENDLYLER.L	Q86Y56	1.73
K.AC*TILLR.G	P49368	1.29		R.SSC*SPGGR.T	Q6UB35	1.78		R.GQTVC*NVK.L	Q92621	1.73
R.C*NYLALVGGGKKPK.Y	Q5MNZ6	1.29		R.LAGLTC*SGAEGLARPK.Q	Q8WV74	1.77		K.AFDKHMNLILC*DC*DEFRK.I	P14678	1.73
R.DCLTQAC*SALTGK.G	Q13795	1.29		R.AAC*FAIQK.G	O15269	1.77		K.AFDKHMNLILC*DC*DEFRK.I	P63162	1.73
K.KEEC*PAVR.L	P07237	1.29		K.KGGNC*DLSHQER.L	Q9H410	1.77		R.VVDGHLNLPVC*K.G	Q12789	1.73
K.LLGGFQETC*SK.A	Q9BVP2	1.29		R.LLTFNPTYC*ALK.E	Q14139	1.77		K.C*EIDPMFQK.T	Q15003	1.72
R.RKPC*SRPLSSILGR.S	P29353	1.29		R.ASC*TSSTSGSKR.N	P13807	1.76		K.AESLIGVYPEQGDC*VISK.V	Q14683	1.72
K.C*PSTHSEELHDCIQK.T	P48507	1.29		R.GC*ALQC*AILSPAFK.V	O95757	1.76		K.C*YTPLVYK.G	O15228	1.72
K.EWCFKPC*EIR.E	Q9Y2T3	1.29		R.GC*ALQC*AILSPAFK.V	P34932	1.76		K.TSC*ALTIHAIGR.Y	Q5VYK3	1.72
K.LTDC*VVMRDPASKR.S	P22626	1.28		R.GC*ALQC*AILSPAFK.V	Q92598	1.76		R.VPAPVTMDSFFFGC*ELSGHTR.S	O75607	1.72
K.GLLSELLHNC*DGQLKGEVAQMAAYYEHR.L	P40938	1.28		R.IFGSIPMQAC*QQK.D	Q6NZY4	1.76		K.QINVC*SQLDWKR.S	P52948	1.72
R.DIKWDFTPC*K.N	P38606	1.28		K.IPQSC*EDRK.V	Q6NXR4	1.76		R.C*PQVEEAIVQSGQK.K	Q9BVP2	1.72
R.AAAGGLAMLTSMRPTLC*SR.I	Q9H3U1	1.28		R.KLNPPDESGPGC*MSC*K.C	P01112	1.76		K.NTPSFLIAC*NK.Q	Q9Y5M8	1.71
K.C*VNGNEL.-	Q9BTE3	1.28		R.C*RSPGMLEPLGSSR.T	Q9UQ35	1.75		R.LENPDEAC*AVSQK.H	Q5T4S7	1.71
R.EQC*NAER.I	Q99570	1.28		R.EGRLEDVENLGC*R.L	Q9UJX3	1.75		R.KVC*LPFVPATTK.Q	Q6P4H8	1.71
R.GDLNDC*FIPC*TPK.G	P11586	1.28		R.AYIC*AHPLDR.T	Q9H845	1.75		K.LDALEWESC*FNK.V	Q92538	1.71
R.GGGGGPC*GFQPASR.G	Q96QR8	1.28		R.ISLGLPVGAVINC*ADNTGAK.N	P62829	1.75		K.LNCQVIGASVDSHFC*HLAWVNTPK.K	Q06830	1.71
R.GLLC*GLGAGVAEAVVVVC*PMETIK.V	P53007	1.28		K.VIEDVAFAC*ALTSSVPTTK.K	Q14527	1.75		R.TAAPTVC*LLVLSQAEK.V	Q9NVI1	1.71
K.NC*TAGAVYTYHEK.K	Q9Y314	1.28		K.EC*ADLWPR.I	P62829	1.74		R.AGIPC*PTVVLLK.K	O14730	1.71
R.LSQEC*PIKEVVLYVKEEMKR.N	Q9Y6E2	1.27		R.LLDRDAC*DTVR.V	Q9NZL4	1.74		R.SIAC*WTLSR.Y	O14787	1.71
R.AHIAQLC*EK.A	Q00610	1.27		R.HYAHTDC*PGHADYVK.N	P49411	1.74		R.SLEEDC*FEVTR.E	Q96H55	1.71
K.EQSQPC*ADNAVLSSGLTAAR.-	P19784	1.27		R.LIPDGC*GVK.Y	P27635	1.74		K.SQDVAVSPQQQQC*SK.S	Q96F86	1.71
K.LTGIKHELQANC*YEEVKDR.C	P23528	1.27		K.ALLLVPASVNC*LR.L	Q5SRE5	1.74		R.VVC*SSGAVGNYSGGLAVKEWLLAHEGHR.L	P16455	1.71
K.C*YADTMFSLLGK.K	P51580	1.27		R.LAQMSIC*SSLAR.K	O95861	1.74		R.LALFNPDVC*WDR.N	O00483	1.7
K.EALC*DPTVASR.L	Q9BRX2	1.27		R.NLVQC*GDFPHLLVYGPSGAGK.K	P40938	1.74		K.EWCFKPC*EIR.E	Q9Y2T3	1.7
R.LFVSGAC*DASAK.L	P62873	1.27		K.KLNCQVIGASVDSHFC*HLAWVNTPKK.Q	Q06830	1.73		R.NYLEPGKEC*VQPATK.S	P16615	1.7
R.LLDPSAEIIVLKEPPTIRPNSPYDLC*SR.F	Q96RU2	1.27		K.AFPMLC*SLALHK.Q	Q92766	1.73		R.ASC*TSSTSGSKR.N	P13807	1.7
K.RQEC*ETK.I	Q15311	1.27		R.AVGIWHC*GSC*MK.T	P61513	1.73		R.GIPMVLIGC*K.T	Q9HBH0	1.7
K.QLVPASGLTVMDLEAEGTC*LR.F	Q6P996	1.27		R.DGHPNVLHDC*QR.Y	O75146	1.73		K.EHVAAVAGEPQPASC*LSR.L	P22736	1.7
R.SAEC*IDEAAER.L	Q8IYS1	1.27		K.SLENETLNKEEDC*HSPTSKPPKPDQPLK.V	P23588	1.73		K.ITEYLC*EPLRK.C	P63010	1.7
K.SNLQNC*SK.F	Q15054	1.27		R.TKETNC*ESDRER.G	Q7Z6Z7	1.73		K.ITEYLC*EPLRK.C	Q10567	1.7
R.SVGDGLSTSAVGC*ASAAPR.R	E7EV46	1.27		R.LMSLCC*R.L	Q15386	1.73		K.NMSVHLSPC*FRDVQIGDIVTVGEC*RPLSK.T	P62280	1.7
R.SVGDGLSTSAVGC*ASAAPR.R	Q03468	1.27		R.NSSAQAFLGPENPEEPYLDGINYNC*VAPGKR.F	Q14683	1.73		R.QRPGSDEC*LR.V	Q9UM82	1.7
R.VC*GAVMDTLK.Q	P13196	1.27		R.GMPETTQPDKQC*GQVAAAAAAQPPASHGPER.S	O95817	1.73		K.QLEC*C*KER.F	Q9NVU7	1.7
K.LMAYLAGAKYTGYLC*R.S	Q6ZW49	1.27		R.QLAMYEC*K.V	Q9Y5U4	1.73		R.GGGRTEDGHSC*GASRE.-	Q8N0V3	1.7
K.KETGAASFLC*R.Y	P29144	1.26		K.VVDC*SREETR.L	P30825	1.73		R.VWELGGC*ANK.E	P08240	1.7
R.QIPYTMMKFAC*FERTVEALYKFVVPKPR.S	Q00325	1.26		K.LICC*DILDVLDK.H	P62258	1.72		R.DC*LTQACSALTGK.G	Q13795	1.69
R.AYEYVEC*PIR.G	P53701	1.26		K.RAQAWC*YSK.N	P51149	1.72		K.EGC*TVSPETISLNVK.G	O60313	1.69
K.EADASPASAGIC*R.I	Q9BW27	1.26		R.TQNLPNC*QLISR.S	P37268	1.72		K.GVFDC*RK.N	Q01813	1.69
K.NMMAAC*DPR.H	I3L2F9	1.26		R.KFPYC*EATLLQQLVR.S	Q8IV38	1.72		R.IGSSLYALGTQDSTDIC*KFFLK.V	Q9UNH7	1.69
K.NMMAAC*DPR.H	Q3ZCM7	1.26		R.NYLEPGKEC*VQPATK.S	P16615	1.72		K.GSQMGTVQPIPC*LLSMPTR.N	Q9NZB2	1.69
R.NMMAAC*DPR.H	Q9BUF5	1.26		R.QEYALAMIQC*K.V	Q9UI12	1.72		K.KGDEC*ELLGHSK.N	P49411	1.69
K.NMMAAC*DPR.H	Q9BVA1	1.26		K.SVLFVCLGNIC*R.S	P24666	1.71		K.IKNPSIDLC*TC*PR.G	Q6P158	1.69
K.QGNC*YLAALNC*LR.L	Q12769	1.26		K.AVVVDITEHC*H.-	O15431	1.71		R.GKEENISC*DNLVLEINSLK.Y	Q13144	1.69
K.TC*DGVQC*AFEELVEK.I	Q9NP72	1.26		K.AKPTGSGKEEGPAPC*K.Q	Q8IUF8	1.71		R.EYGSC*SHHYQQLLQSLEQGAQEESR.C	Q15149	1.69
R.VGVTVAQTTMEPHLLEAC*VR.D	P47897	1.26		K.TFGC*GSAIASSSLATEWVK.G	Q9H1K1	1.71		R.VEANLHGLTLYDTAPC*PINNER.T	Q6UX65	1.69
K.VMEEC*KR.L	O95292	1.26		K.EMFPYEASTPTGISASC*R.R	P42167	1.71		R.VVVVASAAHC*R.G	Q6UX07	1.69
K.EFDKKYNPTWHC*IVGR.N	P63167	1.25		K.C*MIDQAHQEERPIR.Q	Q9UBQ5	1.71		K.YQGEHC*LLK.E	Q96Q11	1.69
K.EFDKKYNPTWHC*IVGR.N	Q96FJ2	1.25		R.AGGGGGGDYGLVTAGC*GFGK.D	Q8NI37	1.71		K.TKSC*SGVEFSTSGSSNTDTGKVTGTLETK.Y	P45880	1.69
R.STVLSLDWHPNNVLLAAGSC*DFK.C	O15143	1.25		K.C*LTSNLLQSR.K	Q96GX5	1.71		K.GIRDTQC*GFK.L	Q9Y673	1.68
R.STVLSLDWHPNNVLLAAGSC*DFK.C	Q92747	1.25		K.LNC*QVIGASVDSHFC*HLAWVNTPK.K	Q06830	1.71		R.VKYC*NSLPDIPFDPK.F	Q8N7H5	1.68
R.LIGPNC*PGVINPGEC*K.I	P53597	1.25		R.MVESCLGSPC*WASPQLLR.I	Q9Y4W2	1.71		K.RSPEEKQEMLQTEGSQC*AK.T	Q9UI12	1.68
K.RLIPDGC*GVK.Y	P27635	1.25		R.NAC*IEC*SVNQNSIR.N	Q9UBB4	1.71		R.KLTAQEAC*SR.G	Q8N8U2	1.68
R.AESSQTC*HSEQGDKK.M	P46063	1.25		R.QAVGSGAQETC*GLDR.I	Q9C0B7	1.7		R.AILLPMDLDAHISSMLSSGASC*AAAAQR.N	Q14573	1.68
R.C*FQPPIHQSLASS.-	Q7L576	1.25		R.LLGPTVMLGGC*EFSR.Q	Q8N9T8	1.7		K.AVAWC*PWQSNVLATGGGTSDR.H	Q12834	1.68
R.C*SDIISYTFKP.-	Q9H840	1.25		K.C*GYAGSNFPEHIFPALVGRPIIR.S	P61160	1.7		R.C*SWLVPSPK.V	Q3SXM5	1.68
K.IIYEQEGVYIHSSC*GK.T	Q8TC07	1.25		K.ALTNLPHTDFTLC*K.C	Q9UBQ5	1.7		K.DMDLAC*K.Y	Q96BR5	1.68
R.AC*IAEK.L	P60981	1.24		K.DSGAASEQATAAPNPC*SSSSR.T	Q9BU23	1.7		R.SGNKECPTC*R.K	Q06587	1.68
R.C*LSDPAEGC*R.A	Q86Y56	1.24		K.GSPC*SEEAGTLR.R	Q9NVI1	1.7		R.SGNKECPTC*R.K	Q99496	1.68
R.IVEDDASISSC*NK.L	Q7Z5K2	1.24		K.LQVSYDC*R.A	Q86TG7	1.7		K.FTTSDSC*DR.I	Q08117	1.68
R.QAGLLAVMAQMGCYVPAEVC*R.L	P52701	1.24		K.MLPTYVC*ATPDGTEKGDFLALDLGGTNFR.V	P52789	1.7		K.IC*PMEHILVR.L	Q86XI2	1.68
K.SACGNC*YLGDAFR.C	Q6FI81	1.24		K.VSSC*EQR.L	Q8WX93	1.7		R.LDC*AQLK.E	P09543	1.68
K.GC*LELIKETGVPIAGR.H	P11586	1.23		K.VRPSTGNSASTPQSQC*LPSEIEVK.Y	Q9UJX3	1.69		K.QGNC*YLAALNC*LR.L	Q12769	1.68
K.QGVEYVPAC*LVHR.R	Q15527	1.23		R.GC*FYPHAFNVK.F	Q92989	1.69		K.QVGC*AFDMLWK.L	Q53R41	1.68
R.GKYDC*GHVQK.K	O15235	1.23		K.C*SPEKDGLGSSPR.V	P52569	1.69		R.QAVLGAGLPISTPC*TTINKVC*ASGMK.A	P24752	1.67
R.AATMSAVEAATC*R.A	Q53H96	1.23		K.GC*MTAAEISK.Y	Q96KC2	1.69		R.IGLYPANYVEC*VGA.-	Q9UKS6	1.67
K.RPPSAFFLFC*SEYRPK.I	P09429	1.23		R.SVSTLKPC*AK.D	Q7Z3U7	1.69		K.FATC*SDDGTVR.I	Q9C0J8	1.67
R.C*APSAGSPAAAVGR.E	Q7L2J0	1.23		R.VVAAAFQSEDPADPC*ALLQR.R	Q8N8A6	1.69		K.KETGAASFLC*R.Y	P29144	1.67
K.C*DLISIPK.K	Q9ULV4	1.23		K.MLSC*AGADRLQTGMR.G	P27635	1.69		R.LHSVC*TLSK.M	P11172	1.67
R.C*RPLQFASQK.E	Q7Z7A3	1.23		K.C*FLAQPVTLLDIYTHWQQTSELGR.K	Q13428	1.68		K.MKYDFSC*ELYR.M	Q13490	1.67
K.GTAVAIC*R.R	P16615	1.23		R.AATSTLSVC*DFLGEK.I	Q8N128	1.68		K.C*AGAPQK.I	Q9Y6N5	1.67
K.FFIGQFSDDRHC*SR.F	P52701	1.23		R.ANSSVVSVNC*K.G	O60502	1.68		R.KC*EQSTSATLGVR.V	Q92551	1.67
R.MLGETC*ADC*GTILLQDK.Q	O60232	1.23		R.ELLDLHKQPTSEANC*SAMFGK.L	Q29RF7	1.68		K.IVGAPMHDLLLWNNATVTTC*HSK.T	P11586	1.67
R.QC*VLSTLAQLLLDKDC*TVLVGR.Q	Q9NU22	1.23		R.AC*QSLASR.D	Q12789	1.68		K.LNEC*VDHTPK.L	P78417	1.67
K.QC*QEGAYLR.N	O00471	1.23		R.IDILINCAAGNFLC*PAGALSFNAFK.T	Q9NUI1	1.68		R.RQAEEIYENIPGLC*K.T	O60518	1.67
R.KSPSSDSWTC*ADTSTER.R	Q8N6T3	1.22		R.LANLAATIC*SWEDDVNHSFAK.Q	Q9NQW6	1.68		K.SLC*IGATYDVTDSR.I	O00541	1.67
R.ELLDLHKQPTSEANC*SAMFGK.L	Q29RF7	1.22		-.MILNSLSLC*YHNK.L	Q9NX74	1.68		R.THTYEC*R.G	P30876	1.67
R.SHHPESGC*R.T	Q5TA50	1.22		K.KNEPPLTC*PYSLK.A	Q9UGP8	1.67		K.VTELC*LLAVHR.C	Q9NSU2	1.67
K.TESPVLTSSC*R.E	Q9H3U1	1.22		R.LVQAFQFTDKHGEVC*PAGWKPGSDTIKPDVQK.S	Q06830	1.67		K.LLGITPVC*R.M	Q5T160	1.66
R.INISEGNC*PER.I	Q15365	1.22		R.SNAALALQLAHC*WLQR.Q	Q05932	1.67		R.EGRLEDVENLGC*R.L	Q9UJX3	1.66
R.INISEGNC*PER.I	Q15366	1.22		R.GSSSYSQLLAATC*LTK.L	Q9UIA9	1.67		R.ALQELPLC*LR.L	Q9NQS1	1.66
K.C*SVC*PDYDLCSVCEGK.G	Q13501	1.22		R.KLASLTPGFSGADVANVC*NEAALIAAR.H	Q9Y4W6	1.67		R.C*AGDWLPR.G	Q9H553	1.66
R.C*AQAAEVAATVPGAGVGNVGLRPPMVPR.Q	Q7L5N7	1.22		K.LIFC*SGLVLHR.L	P22736	1.67		R.C*LADIVVATPGR.L	Q8N8A6	1.66
K.EAVLSC*SQALK.I	Q6PGP7	1.22		R.LPLALPPASQGC*SSGGGGGGGGGSSAGGSGNSRPPR.N	Q9NZL4	1.67		R.C*VNQWQLSGELK.A	Q86W42	1.66
K.FGVEAFSDC*LR.Y	Q02338	1.22		R.RPC*PYEQAQGGDGPEEQ.-	Q9H1C4	1.67		K.KEEC*PAVR.L	P07237	1.66
K.TKPLWHNYFLC*GLK.G	Q01415	1.22		R.QDLADVVQVC*EGK.K	Q14204	1.66		R.EIVNAFC*QETSPEMK.G	Q9BXW9	1.66
K.QLINTLC*SGR.W	Q9NVI1	1.22		R.SIQFVDWC*PTGFK.V	P68366	1.66		K.FIDPFC*K.I	Q14684	1.66
K.SPSELLEIC*ELSQEK.M	Q9NRG4	1.22		K.GC*LLYGPPGTGK.T	P62333	1.66		K.GVPVSEAEC*TAMGLR.S	Q5VT66	1.66
R.SSC*SPGGR.T	Q6UB35	1.22		R.DLSYC*LSGMYDHR.Y	P52597	1.66		K.GVPVSEAEC*TAMGLR.S	Q969Z3	1.66
R.VVSPGPLHC*LK.V	Q96CQ1	1.22		R.FQSAAIGALQEASEAYLVGLFEDTNLC*AIHAK.R	P84243	1.66		R.VHIPNDDAQFDASHC*DSDKGEFGGFGSVTGK.I	Q16576	1.66
K.KC*DLISIPK.K	Q9ULV4	1.22		K.NNQESDC*VSK.K	A6NDG6	1.66		R.RYPNVFGIGDC*TNLPTSK.T	Q9Y6N5	1.66
K.FASHC*LMNHPDLAK.D	Q29RF7	1.22		K.YKWC*EYGLTFTEK.W	P45880	1.66		R.AGIPC*PTVVLLKK.H	O14730	1.66
K.FASHC*LMNHPDLAK.D	Q9NTI5	1.22		R.SAFC*LTPMGMMQFNDILQNLKR.S	A7E2V4	1.65		R.WLC*TGDIGEFEPDGCLK.I	O95573	1.65
R.VRGDNYC*ALR.A	Q96BN8	1.21		R.TLKLTTPTYGDLNHLVSATMSGVTTC*LR.F	Q9BVA1	1.65		R.NAC*IECSVNQNSIR.N	Q9UBB4	1.65
R.DSGAALGLGIALHSPC*YAQVR.R	Q9BUM1	1.21		R.YVAAAFPSAC*GK.T	Q16822	1.65		K.YMAC*CLLYR.G	P68366	1.65
R.TVEIC*PFSFDSR.D	Q9ULW0	1.21		K.VGEC*EASAMLPLEC*QYLNK.N	Q9H3P2	1.65		K.YMAC*CLLYR.G	Q71U36	1.65
R.SEGTPEKPLYHPC*VC*TGSIK.F	O60337	1.21		R.EQIDNLATELC*R.I	O95295	1.65		R.ETGEVVDC*HLSDMLQQLHSVNASKPSER.G	P53350	1.65
R.AAC*FAIQK.G	O15269	1.21		R.LKNC*GCLGASPNLEQLQEENLK.L	P54136	1.65		K.SYC*AEIAHNVSSK.N	P62910	1.65
R.AC*AEALR.S	O60232	1.21		K.VDENFDC*VEADDVEGK.I	O14929	1.65		K.VQENSAYIC*SR.R	Q9Y3T9	1.65
K.FC*IQEIEK.S	Q5JTH9	1.21		K.ALC*IDQLDVFLQK.E	Q5T8P6	1.65		K.TKGESANC*EK.Y	Q6P2P2	1.65
K.FIDPFC*K.I	Q14684	1.21		K.KAYSFC*GTVEYMAPEVVNR.R	P51812	1.65		R.C*IPQLDPFTTFQAWQLATK.G	O75362	1.65
R.FSC*LLPDPR.E	Q92538	1.21		R.GAC*YGADHDLGR.L	Q6NUM9	1.65		K.EMFPYEASTPTGISASC*R.R	P42167	1.65
K.GAC*SSSGATSSK.S	O60870	1.21		R.SHHPESGC*R.T	Q5TA50	1.65		R.SKMEAAGFTISGASHPIC*PVMLGDAR.L	O75600	1.65
K.HC*SQVDSVR.G	Q14247	1.21		R.NSSVAMGASLSC*SEYSLK.V	Q9NTM9	1.64		K.KQQC*EELVTGTVR.T	O95219	1.65
K.LQAFGFC*EYKEPESTLR.A	P49756	1.21		K.RTIQFVDWC*PTGFK.V	Q71U36	1.64		R.GLGSGLQPWC*PLDLR.L	P42695	1.64
R.LYLDELEGGGNPGASC*K.D	Q9HD26	1.21		K.EADASPASAGIC*R.I	Q9BW27	1.64		K.SGDAAIVDMVPGKPMC*VESFSDYPPLGR.F	P68104	1.64
R.TLC*DYSK.R	O14744	1.21		R.VQVMDAC*LR.C	Q9UBF6	1.64		K.AAGC*NIPVASVAAGFPAGQTHLK.T	Q9Y315	1.64
K.VLSEC*SPLMNDIFNKEC*R.Q	P53618	1.21		K.C*C*LTYCFNKPEDK.-	P62979	1.64		K.SQGGEEEGPLSDKC*SR.K	Q9H063	1.64
R.EC*LLSAPR.K	Q86XI2	1.21		R.LWYVGGSC*LDHR.T	O60343	1.64		K.AQQETGEREASC*R.D	Q86XL3	1.64
R.VKYGQC*WVFAAVACTVLR.C	P21980	1.2		K.QALPC*VAESPTVHVEVHQR.G	Q15645	1.64		K.EDSQSC*R.V	Q96T76	1.64
K.AFIHWVSQPLMC*EVR.L	P47897	1.2		R.SLC*SDDTPMVR.R	P30154	1.64		R.LC*QQVDITQK.Q	Q8IWA4	1.64
R.LIPDGC*GVK.Y	P27635	1.2		R.VQPAC*K.R	P35227	1.64		K.NVTQIEPFC*LETDRR.G	Q9ULW0	1.64
R.SGRPAC*QK.A	Q9Y4P3	1.2		K.GIVDC*IVR.I	P12236	1.64		R.QAEEEC*AHR.G	Q9H147	1.64
R.AATEC*MCNLAMSK.E	Q9H3U1	1.2		R.DAGSRDEKAEAGEAGQATAEAEC*HR.T	O95671	1.63		K.TIC*DSSVSTHDLK.V	P23458	1.64
R.AC*KPPGER.N	Q13163	1.2		K.LDLQHC*VLPSR.L	Q9BXW9	1.63		R.EVLEHPWITANSSKPSNC*QNKESASK.Q	O14965	1.63
R.KALLMC*EACR.V	P40938	1.2		K.KALIVGHC*MPGPR.M	Q6P1L8	1.63		K.GKEFEFSQLPLKVEFLEC*SAK.G	Q9Y5M8	1.63
R.APVFLQFC*DSGGR.G	Q4ZIN3	1.2		R.HGFC*GIPITDTGR.M	P12268	1.63		R.KIVEAC*K.A	Q9NT62	1.63
R.C*GLDLIVQAK.S	Q9UHI6	1.2		R.ILEMQNC*EGR.D	Q9BT40	1.63		K.YC*EPVVKGEASER.D	O43913	1.63
R.FFPEAIEFIDEALSQNC*GVLVHCLAGVSR.S	Q99956	1.2		R.LIITSAEASPAEC*CQHAK.I	Q14C86	1.63		R.TQNLPNC*QLISR.S	P37268	1.63
R.FHC*DPTFWAK.N	Q9UPN9	1.2		R.LPLC*SLPGEPGNGPDQQLQR.S	Q96GX2	1.63		R.RC*PGGLPGHAGGAAPGR.G	Q8N726	1.63
R.FSLPGATC*LQGEGQGHLSQK.K	P57764	1.2		R.STSSC*SSK.Q	Q9H4L5	1.63		K.LREELGLC*ER.T	Q12789	1.63
R.GIGDC*VR.Q	P53007	1.2		R.TC*QFC*PQFR.E	P21580	1.63		K.FYAPWC*GHC*K.T	Q8NBS9	1.63
K.LTSDPTDIPVVC*LESDNGNIMIQK.H	O43504	1.2		K.VVLVGDGGC*GK.T	O00212	1.63		R.GQDDLVVC*LHR.S	B0I1T2	1.63
R.SAPHLPGLMC*LLR.L	Q8IZL8	1.2		K.WFPEVTHFC*R.G	Q9HBH0	1.63		R.RHAC*SSIIK.M	Q9HAV4	1.63
R.SASYPC*AAPRPGAPETTALHGGFQR.R	Q7Z3C6	1.2		K.YMLDC*R.T	Q9Y277	1.63		R.IMQFC*HTLR.E	Q9Y613	1.63
R.SQLELLISPTC*SC*K.Q	Q29RF7	1.2		K.NC*GCLGASPNLEQLQEENLK.L	P54136	1.63		R.LLPPLPC*AVDLLTQLSSILK.M	Q86XA9	1.63
R.SSTETC*YSAIPK.A	O75369	1.2		K.LLGITPVC*R.M	Q5T160	1.62		R.KLNPPDESGPGC*MSC*K.C	P01112	1.63
K.SSVNC*PFSSQDMK.Y	Q08211	1.2		K.GSRHPC*ITK.T	P52701	1.62		K.TESPVLTSSC*R.E	Q9H3U1	1.63
K.KYSSVSEPAKVSEC*C*R.F	Q9Y263	1.2		K.LLSLLPLSC*QK.R	Q9Y289	1.62		R.VLC*PINYPLSPTR.F	Q96LD4	1.63
K.DAYC*C*AQQGK.R	Q9NR33	1.19		R.GIPMVLIGC*K.T	Q9HBH0	1.62		R.VNDFETADILC*PK.A	Q9BZD4	1.63
R.FKTFGC*GSAIASSSLATEWVK.G	Q9H1K1	1.19		R.GSVHSAC*SSEHK.G	P48553	1.62		R.AQLTQLFLASVLEC*PFYK.G	Q14CZ7	1.62
R.NSSVAMGASLSC*SEYSLK.V	Q9NTM9	1.19		K.HFVLDEC*DKMLEQLDMR.R	O00148	1.62		K.AAC*NLLQR.G	Q01813	1.62
R.C*LLSDELSNIAMQVR.K	Q86YH6	1.19		K.KIGC*GNFGELR.L	P78368	1.62		R.GAQPAPLLC*SVLK.A	Q15345	1.62
R.LNC*AEYKNWVK.A	Q8TB03	1.19		K.KIGC*GNFGELR.L	Q9HCP0	1.62		K.ATNVC*TR.F	O60264	1.62
R.QKDTC*ASVR.R	Q8NDA8	1.19		K.KIGC*GNFGELR.L	Q9Y6M4	1.62		K.GDGARPTTHC*DEVLR.L	Q6NXR4	1.62
R.SQSPAASDC*SSSSSSASLPSSGR.S	O95817	1.19		K.IVAISC*AADILK.A	Q5VYK3	1.62		K.IHFVPGWDC*HGLPIEIK.V	Q9NSE4	1.62
R.AAC*CLAGAR.A	O95336	1.19		K.KPVSTTNLQDPGVLGC*PR.T	Q92621	1.62		K.FASHC*LMNHPDLAK.D	Q29RF7	1.62
K.AQETMDSLAMVEGVSSC*QDLYR.K	Q86Y56	1.19		R.VLSLQDKSDDLTC*K.S	Q7L3T8	1.62		K.FASHC*LMNHPDLAK.D	Q9NTI5	1.62
R.C*IQDFFKK.H	O75794	1.19		K.C*VLTHSPTWIIDPIDGTCNFVHR.F	O14732	1.61		R.GNYSTDQLC*VLDNVK.M	Q7Z4Q2	1.62
K.GFC*LDVIR.N	Q9HCU9	1.19		R.VLKGNTAEGC*VHETQEK.Q	Q9BQG0	1.61		K.LPTGTTLESAGVVC*PYR.A	P54098	1.62
K.IEC*EIKINHEGEVNR.A	Q16576	1.19		R.TIAALLPC*LLDK.G	Q5VYK3	1.61		R.KMGVPYC*IIK.G	P62424	1.62
K.IGIVGFC*WGGTAVHHLMMK.Y	Q96DG6	1.19		K.AMLTLNNC*R.E	Q9BXW9	1.61		R.TC*QFC*PQFR.E	P21580	1.62
R.LDYFLLSHSLLPALC*DSK.I	P27695	1.19		R.AATQC*EFSK.Q	Q96GG9	1.61		R.TSAC*GLFSVC*YPR.V	P30153	1.62
R.LGMLSPEGTC*K.A	P49327	1.19		K.C*YDFDVHTMK.T	Q13042	1.61		R.TSAC*GLFSVC*YPR.A	P30154	1.62
R.LGYVC*PQEVAPMLQQFIRPWC*TSLR.N	O14787	1.19		R.DC*QIAHGAAQFLR.E	P30876	1.61		K.SSSSSSASAAAAAAAASSSASC*SRR.L	Q07065	1.62
R.LGYVC*PQEVAPMLQQFIRPWC*TSLR.N	Q92973	1.19		K.SKLNILQEGHAQC*LEAVR.L	Q6NXT1	1.61		R.KKC*PSTHSEELHDCIQK.T	P48507	1.61
R.RQWC*YLC*DLPK.M	Q8IU81	1.19		R.GADQKPTSADC*AVR.A	Q8IX01	1.61		R.LLLGNKC*DMEAK.R	P51153	1.61
R.GGGRTEDGHSC*GASRE.-	Q8N0V3	1.19		K.TGC*DVQER.V	Q9BVQ7	1.61		R.LLDRDAC*DTVR.V	Q9NZL4	1.61
K.TAVC*DIPPR.G	I3L2F9	1.19		R.LFREVC*LASER.S	P52701	1.61		R.C*CFLCMVCR.K	Q16527	1.61
K.TAVC*DIPPR.G	Q3ZCM7	1.19		K.LSDFGLC*TGLKK.A	Q15208	1.6		K.QIFQEDKDLVPEFVHSEGLSC*LIR.V	Q9Y613	1.61
R.RASC*TSSTSGSK.R	P13807	1.19		K.LSDFGLC*TGLKK.A	Q9Y2H1	1.6		R.IPSNILLPEDKC*K.E	Q9H081	1.61
K.SC*SGVEFSTSGSSNTDTGK.V	P45880	1.19		K.FYAPWC*GHC*K.T	Q8NBS9	1.6		R.ITC*HTVMEVLR.E	P42345	1.61
K.YQGEHC*LLK.E	Q96Q11	1.18		R.QC*LPSLDLSC*K.Q	P78527	1.6		R.LNTAEIPC*PEPIMLR.S	Q9BRS2	1.61
K.C*MLDAALATLNTHGKENVNSLLPVFEEFLK.N	Q92616	1.18		R.ASC*TSSTSGSK.R	P13807	1.6		K.NTVLC*NVVEQFLQADLAR.E	Q14258	1.61
K.QVTSAEEC*KQVC*WALR.D	Q9Y5L0	1.18		K.LQGATC*NNNK.L	Q14204	1.6		R.QHC*NRLNIEELLK.H	Q8WYP5	1.61
R.RLDEC*EEAFQGTK.V	P61289	1.18		R.AYC*EGCYVATLEK.C	Q15654	1.6		K.QVC*WALR.D	Q9Y5L0	1.61
R.QMEKDETVSDC*SPHIANIGR.L	P47756	1.18		K.C*STGYEK.N	P49790	1.6		K.SC*PQWNSLSTC*HIR.M	Q8N682	1.61
K.SAMSEIEGIQSLIC*R.Q	I3L3Q1	1.18		R.RDC*QEQAK.I	P12270	1.6		K.TFINLMTHIC*K.E	Q9UI12	1.61
K.SAMSEIEGIQSLIC*R.Q	Q6ZSZ5	1.18		R.ILPMAGRDPEC*QR.T	Q8WVC0	1.6		R.KVAEPELMGTPDGTC*YPPPPVPR.Q	P27708	1.61
R.YGDGGSTFQSTTGHC*VHMR.G	P31943	1.18		R.ITQSLC*FIHR.Y	Q96AA3	1.6		R.VEAEGLAALHSLTAC*LSR.S	Q96T76	1.61
R.VWELGGC*ANK.E	P08240	1.18		K.VNQC*VIGTAQANRK.-	Q9BW19	1.6		K.VLVVSVC*PQSLPYFAAK.F	Q9UHQ1	1.61
R.LIGNLC*YK.N	Q9UBB4	1.18		K.KITAFVPNDGC*LNFIEENDEVLVAGFGR.K	P62266	1.59		K.LVAEDLSQDC*FWTK.V	O60610	1.6
R.AGIPC*PTVVLLKK.H	O14730	1.18		R.AEGLATGFC*R.D	Q0PNE2	1.59		R.QKSWWDAVC*TLIHR.K	P49792	1.6
K.C*PYSVPFYPTFK.E	Q53GS7	1.18		K.SGDAAIVDMVPGKPMC*VESFSDYPPLGR.F	P68104	1.59		R.QKSWWDAVC*TLIHR.K	Q99666	1.6
R.EAAC*AQNFR.Q	Q96D53	1.18		K.AMNNSWHPEC*FR.C	P48059	1.59		R.VEKIPGGIIEDSC*VLR.G	P49368	1.6
R.KEYC*ELC*K.H	O60337	1.18		K.DVTYIC*PFTGAVR.G	Q13614	1.59		R.AYADPC*SR.R	Q5T3I0	1.6
R.IGYC*PQFDALLDHMTGR.E	Q99758	1.18		K.ILDATPAC*LP.-	Q9Y5Y2	1.59		R.C*LSEQSVAISR.C	P41134	1.6
R.SLLC*GEDEAADENPESQEMLEEQLVR.M	Q9HAV4	1.18		K.TC*LLMR.Q	Q6UB98	1.59		R.ELAHC*QK.V	O00411	1.6
R.TLVGIC*SEHQSR.T	Q9H3U1	1.18		K.TC*LLMR.Q	Q6UB99	1.59		R.LC*TQLEGLQSTVTGHVER.A	Q6P2E9	1.6
K.VANVIVDHSLQDC*VFSK.E	A9UHW6	1.18		R.KSPSSDSWTC*ADTSTERR.S	Q8N6T3	1.58		R.LHQDC*ALR.M	Q5VV42	1.6
R.WLLC*NGSLFR.Y	Q9NX61	1.18		R.KALLMCEAC*R.V	P40938	1.58		R.NLISVGC*PITK.T	Q5T5D7	1.6
K.YMAC*C*LLYR.G	A6NHL2	1.18		R.LFLSC*PIDVDGSR.V	Q8IVL1	1.58		R.NTPSEPIHC*IVWAK.Y	Q9UBT2	1.6
K.YMAC*C*LLYR.G	P68366	1.18		K.QSLLFC*PK.S	Q56VL3	1.58		K.ALEQKPDDAQYYC*QR.A	Q9Y2Z0	1.6
K.YMAC*C*LLYR.G	Q71U36	1.18		R.TSESLC*QNNMVILK.L	O14980	1.58		K.SCDPGLEDPC*GLNR.A	Q9HAV4	1.6
K.TAVC*DIPPR.G	Q9BVA1	1.18		R.C*LPLSMDVR.A	Q9NUI1	1.58		K.C*YSDAAAKK.Q	Q9Y446	1.6
K.LSDFGLC*TGLKK.A	Q15208	1.18		R.FTQC*QNGK.I	O95347	1.58		K.NC*LTNFHGMDLTR.D	P61247	1.59
K.LSDFGLC*TGLKK.A	Q9Y2H1	1.18		K.GVLEC*KPGEASVFQQPK.T	Q96KP1	1.58		K.SAC*GVC*PGR.L	P49207	1.59
K.KC*LELFTELAEDKENYKK.F	P07900	1.17		K.SSEHINEGETAMLVC*K.S	P35613	1.58		K.AWFQTPYTTFGQSPDGC*STVMFPK.I	Q9Y232	1.59
R.DIC*NDVLSLLEK.F	P63104	1.17		K.TFINLMTHIC*K.E	Q9UI12	1.58		K.IC*EDSSELLDSDALNRPLNIMIPK.F	O14787	1.59
R.NVVTIFSAPNYC*YR.C	P67775	1.17		K.YCADQQPENHEVDTSVSGAGC*TTYKEPLDFR.E	A6NDU8	1.58		R.IGC*HGSSLLILAPSEAEYVNSLASHK.I	Q9H8H2	1.59
R.KC*STPEEIKKR.K	P60981	1.17		R.STFQAHLAPVVC*PK.Q	Q9P2X3	1.57		K.LDLQHC*VLPSR.L	Q9BXW9	1.59
R.IWSVPNASC*VQVVR.A	Q9UMS4	1.17		K.IVIVGDGGC*GK.T	Q9HBH0	1.57		K.LHGILC*DDMGLGK.T	O14981	1.59
K.AC*TTEAHK.Q	Q16514	1.17		R.AFQNTATAC*APVSHYR.A	Q9H814	1.57		K.MTC*EYTWPNHLLGSDK.A	B0I1T2	1.59
R.AALETDENLLLC*APTGAGK.T	O75643	1.17		K.AIVLFTSDAC*GLSDVAHVESLQEK.S	P24468	1.57		R.NWNLYPAC*LR.E	Q9BV44	1.59
R.DNAC*NDMGK.M	Q99622	1.17		K.ALC*NIVNNK.M	O60921	1.57		R.SGEQC*SVEPDLISK.V	Q8N201	1.59
R.LSALC*PK.F	Q14149	1.17		K.NAGNC*LSPAVIVGLLK.E	O43175	1.57		R.SHFLAC*PLLR.Q	Q8N201	1.59
K.SSLSC*SLQEGLIPGSQFWDASK.T	P52701	1.17		K.SLC*IPFKPLC*ELQPGAK.C	P07814	1.57		K.GDEC*ELLGHSK.N	P49411	1.59
K.GAQKTDC*QK.N	Q7L266	1.17		R.SPVPLTPPGC*VALDTR.A	Q567V2	1.57		K.DNTIEHLLPLFLAQLKDEC*PEVR.L	P30153	1.58
K.DAEKTPAVSISC*LELSNNLEK.K	Q9Y6M5	1.17		K.GAQKTDC*QK.N	Q7L266	1.57		K.KQNFTFLGHIQTC*YR.Q	Q9NU22	1.58
K.TYC*C*DLK.M	Q9Y6C9	1.17		K.KSC*VEEPEPEPEAAEGDGDKK.G	P51858	1.56		R.TILVYSRPPC*QPQFSLTEPMKK.M	Q9NWV8	1.58
R.VSLIC*PLVK.M	Q8N2W9	1.17		R.SQSPAASDC*SSSSSSASLPSSGR.S	O95817	1.56		K.SSQC*HTGSSPR.G	O15226	1.58
R.TKPQGDQDTGKEADDGC*ALGGR.-	G3V325	1.16		R.VTELNPDKNC*IHTDDDEKISYR.Y	Q9Y6N5	1.56		R.KTFVGTPC*WMAPEVMEQVR.G	O95747	1.58
R.YVAAAFPSAC*GK.T	Q16822	1.16		R.HSTGDTKVPFC*LQSC*VKPLK.Y	O94925	1.56		R.KTFVGTPC*WMAPEVMEQVR.G	Q9UEW8	1.58
K.QVVEEPSPQLPADRFSPEFVDFTAQC*LR.K	P46734	1.16		R.AC*ALQVLSAILEGSK.Q	Q6AI08	1.56		K.ALVEFTNSPDC*LSK.C	Q9UIA9	1.58
R.LGCNAGVSPSFQQHC*VASLATK.A	Q13572	1.16		K.IVSLPEC*FNSPYGAK.Y	Q9NQR4	1.56		R.AYC*EGCYVATLEK.C	Q15654	1.58
R.IIKPC*NHVLSLSFPIR.R	P00367	1.16		K.NADMSEEMQQDSVEC*ATQALEK.Y	P63167	1.56		R.SVVC*QESDLPDELLYGR.A	Q9NS86	1.58
R.IIKPC*NHVLSLSFPIR.R	P49448	1.16		K.YC*KPSWIFGFVAK.S	Q8IZW8	1.56		K.AYPVSGC*FDYLSEDLPDTIHIGGR.I	Q9BTC0	1.58
K.GVPVSEAEC*TAMGLR.S	Q5VT66	1.16		K.IGIVGFC*WGGTAVHHLMMK.Y	Q96DG6	1.55		K.C*AMTALSSK.L	Q99832	1.58
K.GVPVSEAEC*TAMGLR.S	Q969Z3	1.16		R.C*SWLVPSPK.V	Q3SXM5	1.55		K.CPIC*VPC*GLR.L	Q9HAV4	1.58
R.GGC*PGGEATLSQPPPR.G	P20290	1.16		K.SRDFNEEC*PR.L	Q13418	1.55		R.FC*LIC*NYVSR.I	P35249	1.58
K.IGVGAMTWSPLAC*GIVSGK.Y	Q13303	1.16		K.VALEGLRPTIPPGISPHVC*K.L	Q13418	1.55		R.INALTAASEAAC*LIVSVDETIKNPR.S	Q99832	1.58
R.LAAPDPC*DPQRWC*HR.V	O60831	1.16		R.LLLPGWC*HLTVEDGPR.E	Q9UBB6	1.55		R.LGGILPLVTILQC*MK.T	Q96C12	1.58
K.LAQALHQC*SR.I	Q13546	1.16		K.DSDLATQNRPLWQC*FLGR.F	Q29RF7	1.55		R.LILCC*NSTSK.V	P40938	1.58
R.LSC*LDLEQCSLK.V	Q9UDY8	1.16		R.VFVLPC*IQQIQR.I	O75955	1.55		K.SSVC*AK.I	Q9BZX2	1.58
K.NIIQPPSCVLHYYNVPLC*VTEETFTK.L	Q8WVV9	1.16		K.GHSC*YRPR.R	P62753	1.55		K.VSGVC*K.R	Q13309	1.58
R.HGRPPPC*K.K	Q9C0D3	1.16		K.LTDQLPLIIVC*DR.F	Q00610	1.55		R.QRPASLVVADFGCGDC*R.L	O43159	1.57
K.SPVTTLLEC*MHK.L	P55265	1.16		R.LVHSGSGC*R.S	Q13425	1.55		K.IVQIPFC*GEIDC*EDWIKK.T	P07814	1.57
K.TGADVC*R.L	Q86XI2	1.16		R.QAVC*EAR.R	Q8WUP2	1.55		K.SLLC*HLPR.I	Q9NY93	1.57
R.VC*DAVK.A	Q9Y315	1.16		R.QVQGSEISSIDEFC*R.K	Q9UK41	1.55		R.AEVLISTVGPEDC*VVPFLTRPK.V	P56192	1.57
R.VYSASQWDC*PLGLIPHPHR.H	Q92466	1.16		K.VAAAASC*LSQK.V	O95067	1.55		R.QLC*DNAGFDATNILNK.L	Q99832	1.57
R.AENGLLMTPC*YTANFVAPEVLKR.Q	Q15418	1.15		R.VAAVCLTLDPEVVC*R.V	Q14CZ7	1.55		K.AC*TILLR.G	P49368	1.57
R.SYC*FTANKPDGSIR.W	Q9BVK2	1.15		R.LEC*VEPNCR.S	H7BZ11	1.54		R.ETVGEPFFLLLC*AIK.Q	Q9Y4D7	1.57
R.FVPFAAVAAANC*INIPLMR.Q	Q9BWM7	1.15		R.LEC*VEPNCR.S	Q969Q0	1.54		R.GDGPIC*LVLAPTR.E	P17844	1.57
R.MPNQHAC*K.L	Q9NVI1	1.15		K.NAIQLLASFLANNPFSC*K.L	Q15021	1.54		K.GNC*SQHDR.A	Q9BRX2	1.57
K.AAPKPAASGAC*SVSAEETEKWMEEAMHMAK.E	Q7Z6V5	1.15		K.TYC*C*DLK.M	Q9Y6C9	1.54		K.MFQFC*GK.N	Q5VZL5	1.57
R.IKNPFLSLAAC*VMPSR.L	Q92616	1.15		R.AC*SNPSFLR.F	Q6N075	1.54		K.TPNFSTLLC*YDR.V	Q8NI27	1.57
K.AFQYVETHGEVC*PANWTPDSPTIKPSPAASK.E	P30048	1.15		K.AQANC*R.V	Q9HAV4	1.54		R.KMNTIQC*R.A	Q7Z4Q2	1.56
K.ALTNLPHTDFTLC*K.C	Q9UBQ5	1.15		R.RASC*TSSTSGSKR.N	P13807	1.54		R.VRGDNYC*ALR.A	Q96BN8	1.56
K.KIC*AVGITK.L	P55060	1.15		R.NAVIPQYQALFSMDKC*ELNVTEDALK.A	O76031	1.54		K.C*PFTGNVSIR.G	P62280	1.56
K.TELQGLIGQLDEVSLEKNPC*IR.E	Q9UL15	1.15		K.C*HCMSESHQR.Q	O60870	1.54		R.APEILLGC*K.Y	P24941	1.56
K.ALSLC*VALPPGLAVSVLK.A	Q96T76	1.15		R.GAQPAPLLC*SVLK.A	Q15345	1.54		R.NAC*IEC*SVNQNSIR.N	Q9UBB4	1.56
K.ANAAAMC*AK.A	P18583	1.15		R.GPAHC*LLLGER.V	Q15274	1.54		R.SAPHLPGLMC*LLR.L	Q8IZL8	1.56
R.QVYTKC*EGDEVEDLYELLK.L	Q7L8W6	1.15		R.SYTC*KPLER.S	Q6P4A7	1.54		R.C*ATTPMAVHR.V	O95071	1.56
R.C*INFTR.V	Q9H6X2	1.15		R.KVAEPELMGTPDGTC*YPPPPVPR.Q	P27708	1.54		R.LKDAVAHC*HEAER.N	P49792	1.56
R.LTEGC*SFR.R	P42677	1.15		R.EKLGC*QDAFPEVYDKIC*K.A	Q15392	1.54		R.LKDAVAHC*HEAER.N	Q99666	1.56
R.LTEGC*SFR.R	Q71UM5	1.15		K.RPACTLKPEC*VQQLLVCSQEAK.K	P32320	1.53		R.DISNC*WAPK.V	Q15061	1.56
K.MFFIQAC*R.G	P42575	1.15		K.TGIEQGSDAGYLC*ESQK.F	P40939	1.53		K.EC*PIIGFR.Y	P11532	1.56
R.MLQYC*LQGLFHPAR.K	O75533	1.15		K.AC*TTEAHK.Q	Q16514	1.53		R.ESNC*YDPER.V	Q00610	1.56
R.KRPC*GPGEHGQR.I	Q5T280	1.15		K.ADDGPC*K.A	P10646	1.53		R.GAC*AGSEDAVK.A	Q13813	1.56
R.QC*C*VLFDFVSDPLSDLK.W	Q13362	1.15		R.ALLVTNTLGC*GALMAAGDGVR.Q	Q567V2	1.53		K.KGAC*AVEGSK.K	Q14527	1.56
R.QC*C*VLFDFVSDPLSDLK.F	Q14738	1.15		R.C*LVAGLLSPR.F	Q8WYP5	1.53		R.KGSSNNQDVVTCDMAC*K.G	Q6NUQ4	1.56
R.SAFC*LTPMGMMQFNDILQNLKR.S	A7E2V4	1.15		R.EASFSPTDNKFATC*SDDGTVR.I	Q9C0J8	1.53		K.IVIVGDGGC*GK.T	Q9HBH0	1.56
K.VTTC*GTDVIALTK.Q	Q96B45	1.15		K.FTPYVGPIIPC*ILK.A	Q92616	1.53		R.LPPQSC*LLLPPTPVR.G	O75691	1.56
R.YC*VSWMVSSGMPDFLEK.L	Q9NQZ5	1.15		R.GALGALMAC*LR.I	Q6YHU6	1.53		R.SEGTPEKPLYHPC*VC*TGSIK.F	O60337	1.56
K.GLIDYNFHC*FR.K	Q9HB90	1.14		K.LHYC*VSC*AIHSK.V	F8VZW7	1.52		R.QHAAC*K.L	O95239	1.56
K.LNCQVIGASVDSHFC*HLAWVNTPK.K	Q06830	1.14		K.KAC*TTEAHK.Q	Q16514	1.52		R.VTLAQTAVPVLC*GSALK.N	Q969S9	1.56
-.MALVPC*QVLR.M	Q9NVV5	1.14		R.ISASC*QHPTAFEEAIPK.S	Q9ULA0	1.52		R.VWAVLPSSPEAC*GAASLQER.A	Q5T440	1.56
K.ISSTLKVEPC*SLTPGYTK.L	Q96EB1	1.14		R.AVASVVGGWLLC*LR.D	Q86Y56	1.52		R.YC*ALLLPLLK.A	Q13144	1.56
K.SLC*IPFKPLC*ELQPGAK.C	P07814	1.14		R.AVYC*IIGR.C	Q8N1F7	1.52		R.SHAVAC*VNQFIISR.T	Q92973	1.55
K.AMLTLNNC*R.E	Q9BXW9	1.14		R.GIYSQLETLIC*SR.S	Q8N1F8	1.52		K.ILGLQVQQAEHC*SIQDAQAAMR.L	Q9GZR2	1.55
R.KPTDGASSSNC*VTDISHLVR.K	P49321	1.14		K.NSSC*GGGISSSSSSR.G	Q9BXB4	1.52		K.QHYNC*EHSK.I	P50454	1.55
K.EKANEDAVPLC*MSADFPR.V	Q9C0B1	1.14		R.TGSNIDC*EK.L	P55211	1.52		K.ALTNLPHTDFTLC*K.C	Q9UBQ5	1.55
R.AVGDGILC*NTYIDSYK.G	Q53EL6	1.14		R.TPSYSISSTLNPQAPEFILGC*TASK.I	Q14694	1.52		R.AVASQLDC*NFLK.V	P62333	1.55
K.DIEDTLSGIQTAGC*GSTFFR.D	Q8IYU8	1.14		R.VFC*NFQYAPQLAEALIK.V	Q14139	1.52		R.AQC*ETLSPDGLPEEQPQTTK.L	Q7Z6Z7	1.55
R.YLGIPGDKEYCISSDDLFSLPYC*PGK.T	Q16881	1.14		R.FKTFGC*GSAIASSSLATEWVK.G	Q9H1K1	1.52		R.LRPAAAPLEELTMGTSC*LPDTFTK.L	Q12789	1.55
R.IALC*IDGPKR.F	Q14CZ7	1.14		K.EGTALVPYGLPC*IR.E	Q92538	1.51		K.QETSSLAC*GLR.I	Q9Y6D6	1.55
R.ISIESAC*EK.Q	Q9NVC6	1.14		K.TSSSDTLSEEKNSEC*DPTPSHR.G	Q9BXW9	1.51		R.SLPAAC*HWALR.E	Q9P296	1.55
R.LAGLTC*SGAEGLARPK.Q	Q8WV74	1.14		K.ALIVGHC*MPGPR.M	Q6P1L8	1.51		K.KVLTGVAGEDAEC*HAAK.L	O95373	1.54
K.LC*QDLPC*FSR.E	O14929	1.14		R.LSAPGC*WAAC*TNFSR.T	Q04941	1.51		R.TPGAATASASGAAEDGAC*GC*LPNPGTFEECHR.K	O96008	1.54
K.LLPC*LHSFC*LR.C	Q9UPN9	1.14		K.AQLSGLQLQPC*LYK.R	O43159	1.51		K.C*MIDQAHQEERPIR.Q	Q9UBQ5	1.54
R.LKNC*GC*LGASPNLEQLQEENLK.L	P54136	1.14		R.FC*PFYK.T	P38606	1.51		R.KLAGAFLAC*AHLR.A	Q96D53	1.54
K.IKNPSIDLC*TC*PR.G	Q6P158	1.14		K.SAC*GVC*PGR.L	P49207	1.51		K.ILLENVLKPLHFTYNSC*PEGAR.Q	Q15386	1.54
K.TYC*CDLK.M	Q9Y6C9	1.14		K.C*YTPLVYK.G	O15228	1.51		K.AVQC*LNTSSK.E	Q5T4S7	1.54
R.GKYDC*GHVQKK.-	O15235	1.14		K.EAPDGC*PDHVLR.A	Q9UBB6	1.51		R.DAIFC*ENTEPR.S	Q9Y5W7	1.54
R.YVENPSQVLNC*ER.R	O75694	1.14		K.EASSSAC*DLPR.E	Q96SZ5	1.51		K.EGAMAC*TVAVEESIAHHYNNQIR.T	Q99807	1.54
R.SPVPLTPPGC*VALDTR.A	Q567V2	1.14		R.FVQALLAPC*SLR.S	Q9BU23	1.51		R.GC*FYPHAFNVK.F	Q92989	1.54
R.GTFVHSTWTC*PMEVLRDHLLGVSDSGK.I	Q9Y2T3	1.13		K.KGDEVQC*EIEELGVIINK.V	Q6P2I3	1.51		R.IEQIQC*YSAK.D	P52948	1.54
K.YSNSALGHVNC*TIK.E	Q9NQC3	1.13		K.GLLSELLHNC*DGQLKGEVAQMAAYYEHR.L	P40938	1.51		R.LMQC*VSSFSK.N	Q96KP1	1.54
K.LC*VPAMNVNDSVTK.Q	O43865	1.13		R.LAAPDPC*DPQR.W	O60831	1.51		K.KLNCQVIGASVDSHFC*HLAWVNTPK.K	Q06830	1.54
K.LC*VPAMNVNDSVTK.Q	Q96HN2	1.13		R.LTLQKPSC*L.-	Q13309	1.51		R.NIC*GENASVK.V	O00443	1.54
K.SGDAAIVDMVPGKPMC*VESFSDYPPLGR.F	P68104	1.13		K.TRPSSLESVTC*WR.A	Q15345	1.51		R.NMVHPNVICDGC*NGPVVGTR.Y	Q13501	1.54
K.QLSSC*LPNIVPK.L	Q92616	1.13		R.SC*PVVQSSQHLFLDLPKLEK.R	P56192	1.51		R.QYAAC*EQR.L	Q96E22	1.54
R.KWLC*NDQIDAGTRR.W	Q9H3U1	1.13		K.SILPFEAVVC*MYR.F	Q8IZV5	1.51		K.STQDC*R.K	Q9Y221	1.54
K.DSDLATQNRPLWQC*FLGR.F	Q29RF7	1.13		K.TLSC*LDHVISYYHVASDTEK.I	Q9UPT5	1.51		K.DAEKTPAVSISC*LELSNNLEK.K	Q9Y6M5	1.54
K.WC*EYGLTFTEK.W	P45880	1.13		R.SAYC*LGSSHPR.G	Q9NYY8	1.5		R.TQSPGGC*SAEAVLAR.K	Q96MH2	1.54
R.LVVPATQC*GSLIGK.G	Q15365	1.13		K.SVLC*STPTINIPASPFMQK.L	Q96KB5	1.5		R.VQTDAFVSNELDDPDDLQC*K.R	Q9UI10	1.54
K.ETAAAC*VEK.-	Q15631	1.13		R.AVASQLDC*NFLK.V	P62333	1.5		K.YVVLC*ESPQDKR.T	Q8TC07	1.54
K.IC*AVGITK.L	P55060	1.13		K.NMMAAC*DPR.H	I3L2F9	1.5		K.AC*TTEAHK.Q	Q16514	1.53
R.LVLSAQSC*FFR.S	Q9NVX7	1.13		K.NMMAAC*DPR.H	Q3ZCM7	1.5		K.YMACC*LLYR.G	P68366	1.53
K.MLQDC*PK.A	P49137	1.13		K.ENSREDALFC*K.S	Q9NVI1	1.5		K.YMACC*LLYR.G	Q71U36	1.53
R.MNC*VLATYGSIALIVLYFKLRSKKTPAVK.A	Q96IX5	1.13		K.IIYEQEGVYIHSSC*GK.T	Q8TC07	1.5		R.STC*SLTPALAAHFSENLIK.H	Q9BTA9	1.53
R.QC*PLALDAILGLLSLSVK.G	Q9UJX3	1.13		K.QLVPASGLTVMDLEAEGTC*LR.F	Q6P996	1.5		K.LHYC*VSC*AIHSK.V	F8VZW7	1.53
R.IKVSQAAAELQQYCMQNAC*K.D	P50151	1.13		K.QVC*WALR.D	Q9Y5L0	1.5		R.EC*ACAGLAR.L	Q7Z4Q2	1.53
R.VWCDGC*YDMVHYGHSNQLR.Q	Q99447	1.13		K.VLVVSVC*PQSLPYFAAK.F	Q9UHQ1	1.5		R.FGAGGGAAGAVLGIDNVC*ELAAR.L	P10588	1.53
R.YGQNC*HK.G	O15355	1.13		R.VVGSVGQHTGEPVEELALSHC*GR.F	Q9H6Y2	1.5		K.FTPYVGPIIPC*ILK.A	Q92616	1.53
R.YVC*EGPSHGGLPGASSEK.N	P19838	1.13		R.VGIIPPKGC*LLYGPPGTGK.T	P62333	1.5		K.LQGATC*NNNK.L	Q14204	1.53
R.ASC*TSSTSGSK.R	P13807	1.13		R.KDAVALC*SMAK.L	Q9UKU7	1.49		R.NQC*KDLPK.S	Q9NVC6	1.53
K.AVVVDITEHC*H.-	O15431	1.12		R.SHC*FTQAMLSQPR.M	Q9UBM1	1.49		R.SGVVC*R.V	Q8N7H5	1.53
R.AGQTTYSGVIDC*FR.K	Q9UJS0	1.12		R.LFVSGAC*DASAK.L	P62873	1.49		R.SSSLTC*HQR.I	Q96K58	1.53
K.C*FSLAATR.S	Q9NYL9	1.12		R.QC*DPSER.K	Q5VT66	1.49		R.RASC*TSSTSGSKR.N	P13807	1.53
R.C*HMEENQR.V	Q96TC7	1.12		K.SCDPGLEDPC*GLNR.A	Q9HAV4	1.49		K.AAQGPPAPAVPPNTDVMAC*TQTALLQK.L	O60232	1.52
K.ITIPLAC*K.I	Q9BX95	1.12		K.TDIQIALPSGC*YGR.V	P33316	1.49		K.GC*LLYGPPGTGK.T	P62333	1.52
R.IYC*EDKQTFLQDCEDDGETAAGGR.L	Q9P2X3	1.12		R.VVC*SSGAVGNYSGGLAVK.E	P16455	1.49		R.KLVEALC*AAGHR.A	P23919	1.52
K.LC*SLLDSEDYNTCEGAFGALQK.I	Q92973	1.12		R.FLVTVIKDLLGLC*EQK.R	O14980	1.48		K.AC*FQVGTSEEMK.M	P35658	1.52
K.LCSLLDSEDYNTC*EGAFGALQK.I	Q92973	1.12		R.AVC*MLSNTTAIAEAWAR.L	P68366	1.48		K.DAQPC*R.E	Q13459	1.52
R.LEQC*PLQLNNPFNEYSK.F	Q9BPZ7	1.12		R.AVC*MLSNTTAIAEAWAR.L	Q71U36	1.48		K.EAPSPTC*PDLGAK.S	O00257	1.52
K.LHEQLTESEQAAQC*YIK.Y	Q9UJX2	1.12		R.C*PIQLNEGVSFQDLDTAK.L	A6NDU8	1.48		R.AKEGISINC*GLLALGNVISALGDK.S	Q7Z4S6	1.52
R.LQGINC*GPDFTPSFANLGR.T	Q04637	1.12		K.AALC*HLLQYFLK.F	Q13535	1.48		R.FWESNSAAHKEIC*AVLAAVTEVIR.S	Q5JTH9	1.52
R.SLLETNEIPSLILWGPPGC*GK.T	Q96S55	1.12		R.YATTGKC*ELENCQPFVVETLHGK.I	Q06203	1.48		K.GLSNLGNTC*FFNAVMQNLSQTPVLR.E	Q9Y5T5	1.52
R.VVLAEDC*WMK.S	Q9BSE5	1.12		R.TVLSHQGAVC*EFCQPR.E	P28340	1.48		R.LGIVWQDVLPVNIYC*K.A	O43264	1.52
K.VFDPQNDKPSKWWTC*FVK.R	O15145	1.12		R.KVC*LPFVPATTK.Q	Q6P4H8	1.48		K.LIPLC*HQLQTVTK.T	Q9UBT7	1.52
K.VELC*SFSGYK.I	P83731	1.12		K.KLGEWVGLC*K.I	P25398	1.47		R.SIGTDNVC*R.D	Q9UI26	1.52
K.LRFEPVRGLEAIC*AK.F	Q15392	1.11		R.INALTAASEAAC*LIVSVDETIKNPR.S	Q99832	1.47		R.VC*NALALLQC*VASHPETR.S	Q92600	1.52
R.KGLIAAIC*AGPTALLAHEIGFGSK.V	Q99497	1.11		R.GRAEVLISTVGPEDC*VVPFLTRPK.V	P56192	1.47		R.VDALSPQLQQLAC*ECYSR.L	Q8IZL8	1.52
R.VVSTSLDC*LQK.L	Q9Y6D5	1.11		R.SGRPAC*QK.A	Q9Y4P3	1.47		R.VDALSPQLQQLACEC*YSR.L	Q8IZL8	1.52
R.ADELLC*WEDSAGHWLYE.-	Q13232	1.11		R.AVSTGDC*GQVLR.G	Q6PJG2	1.47		K.TLALLQTGC*C*R.N	Q96CB9	1.51
K.QALPC*VAESPTVHVEVHQR.G	Q15645	1.11		K.ELSC*TELQELK.Q	H3BQ06	1.47		R.AAQLEPITYMQGLSAC*EQIR.A	Q9HBH0	1.51
K.RSIQFVDWC*PTGFK.V	P68366	1.11		K.ELSC*TELQELK.Q	Q9ULP9	1.47		K.SC*GKDGFHIR.V	P27635	1.51
R.SNILTLMYQC*MQDKMPEVR.Q	Q92973	1.11		K.LC*DFGVSTQLVNSIAK.T	Q13163	1.47		R.C*IPEIDDSEFCIR.I	Q969U7	1.51
R.RC*LPLSMDVR.A	Q9NUI1	1.11		K.LSGSHLTPLC*YSFISYVQNK.S	Q9NVI1	1.47		R.GAC*YGADHDLGRLHPC*VMASLR.A	Q6NUM9	1.51
R.IGLEGC*LC*QDFYR.I	Q9P2I0	1.11		R.NWAC*FTGKK.V	P53634	1.47		R.GLMAIDC*PHTGIVDYR.Q	Q9H9P8	1.51
R.IYLCDIGIPQQVFQEVGINYHSPFGC*K.F	Q96F86	1.11		K.RSIQFVDWC*PTGFK.V	P68366	1.47		K.ILPVLC*GLTVDPEK.S	Q96KG9	1.51
R.LDQLLGPSC*SR.W	Q92508	1.11		K.SNLQNC*SK.F	Q15054	1.47		R.SGNIKLC*DFGISGQLVDSIAK.T	P45985	1.51
K.DKKPTFEDSSC*SLYR.F	Q96QD5	1.11		K.TVYALPTIAFAFVC*HPSVLPIYSELKDR.S	Q9H2H9	1.47		K.QQAMHLC*FENLMEGIER.N	Q9UIA9	1.51
R.TC*QEQR.L	Q3MHD2	1.11		R.NMMAAC*DPR.H	Q9BUF5	1.47		R.SAIC*IQSWWR.G	O00159	1.51
K.TFINLMTHIC*K.E	Q9UI12	1.11		K.NMMAAC*DPR.H	Q9BVA1	1.47		K.KSDGAC*DSPSSDKENSSQIAQDHQK.K	Q9UIG0	1.51
K.TYDPSGDSTLPTC*SK.K	Q9Y2X3	1.11		R.RISASC*QHPTAFEEAIPK.S	Q9ULA0	1.47		R.SGSAAQAEGLC*K.Q	Q92685	1.51
R.SAVLQPGC*PSVGIPHSGYVNAQLEK.E	Q9P253	1.1		R.FSPEFVDFTAQC*LR.K	P46734	1.47		R.SNAALALQLAHC*WLQR.Q	Q05932	1.51
R.VHTIVISVQHDEEVC*LDEMRDALKEK.V	P31153	1.1		R.GSC*STEVEKETQEK.M	O75348	1.46		K.KTPTEAPADC*R.A	Q7Z6Z7	1.51
K.SVAWAPSGNLLATC*SR.D	O76071	1.1		K.FLTFKDC*DPGEVNK.A	Q9NYK5	1.46		K.WADNFMAEGC*GGSK.E	Q8N357	1.51
R.TIQFVDWC*PTGFKVGINYQPPTVVPGGDLAK.V	Q71U36	1.1		R.SFGAEEHEVC*R.Y	E7ENX8	1.46		K.NAIQLLASFLANNPFSC*KLSDADLAGPLQK.E	Q15021	1.51
K.NADMSEEMQQDSVEC*ATQALEK.Y	P63167	1.1		R.SFGAEEHEVC*R.Y	Q03519	1.46		R.LIPTLVSIMQAPADKIPAGLC*ATAIDILTTVVR.N	Q96P70	1.5
R.IVVEHIIMKPAC*PLFVRR.L	P57088	1.1		R.YVENPSQVLNC*ER.R	O75694	1.46		K.EITTFEGC*K.I	Q9NW13	1.5
R.GALLYMYC*HSLTK.R	A6NDU8	1.1		K.GFSC*VKNELLPSHPLELSEK.N	Q9Y244	1.46		R.C*IPALDSLTPANEDQKIGIEIIKR.T	P10809	1.5
K.QLC*EDWEVVPEPVAR.W	P27707	1.1		R.VLGLGLGC*LR.L	Q9BRJ7	1.46		R.KIGDLAC*ANIQHLSSR.S	Q7L8L6	1.5
R.EQVPSLGSNVAC*GLAYTDYHK.A	A1L0T0	1.1		K.AGVVIHC*NHR.I	Q9H8P0	1.46		K.KC*PFTGNVSIR.G	P62280	1.5
R.HQAC*LLLQK.T	Q9BQG0	1.1		R.EAADDC*AK.A	Q92616	1.46		K.C*ALGWDHQEK.L	Q14247	1.5
K.SC*QTASIATASASAQAR.N	Q96EX3	1.1		K.GTEGLSSC*GNRNEETGTK.S	Q12802	1.46		R.C*QTGCWSPDGSR.L	Q9NRG9	1.5
R.SIQFVDWC*PTGFK.V	P68366	1.1		R.LAHTLGALMC*LAVNTTVAVAMGK.A	Q9Y4R8	1.46		K.ILSDDC*ATLGTLGVIPESVILLK.A	Q86UV5	1.5
R.ATC*TLSGNRDTLWHLFNTLQR.R	Q7Z434	1.1		R.VPAPSIEDICHVLSTVC*K.K	P40938	1.46		K.ISDSNDQESANC*DAK.A	Q9Y5Q9	1.5
K.C*VEFVK.S	Q13547	1.1		R.VYVADNC*GLYAQAEMSNK.A	Q9HC36	1.46		R.LLLC*EHAEK.L	Q8WUM0	1.5
K.IPQSC*EDRK.V	Q6NXR4	1.1		K.YC*SGTGWPSFSEAHGTSGSDESHTGILR.R	Q9Y3D2	1.46		K.LTYLGC*ASVNAPR.S	Q9Y3P9	1.5
K.LCQDLPC*FSR.E	O14929	1.1		R.QAVLGAGLPISTPC*TTINKVC*ASGMK.A	P24752	1.45		R.TLTMVSLGC*GFVGPVVGGWYK.V	P39210	1.5
R.LNNLIC*DESDVKDLAFK.L	Q96EB1	1.1		R.KIGDLAC*ANIQHLSSR.S	Q7L8L6	1.45		R.VLGMELAGGVPLDQC*QGLSQDLR.N	Q96D53	1.5
K.NLLSC*VYSC*PSYIAK.D	Q9H583	1.1		R.KGGSYSQAASSDSAQGSDVSLTAC*KV.-	P01891	1.45		R.VPAPSIEDICHVLSTVC*KK.E	P40938	1.5
R.QGSSTSSSPAPVEKPYFPIC*MR.L	Q7Z3U7	1.1		R.KGGSYSQAASSDSAQGSDVSLTAC*KV.-	P01892	1.45		R.KC*MLDAALATLNTHGK.E	Q92616	1.49
K.QAFTDVATGSLGQGLGAAC*GMAYTGK.Y	P29401	1.1		R.KGGSYSQAASSDSAQGSDVSLTAC*KV.-	P05534	1.45		R.GGQDC*R.G	Q9C0J8	1.49
K.SC*QVENGR.V	Q9NR56	1.1		R.KGGSYSQAASSDSAQGSDVSLTAC*KV.-	Q09160	1.45		R.IC*KSPNER.A	Q14204	1.49
R.TQEQC*VHNETKNELEK.M	O60313	1.1		K.IWTAHYDPGHC*FAESR.E	Q9H553	1.45		R.GPC*IIYNEDNGIIK.A	P36578	1.49
K.TTSEELAC*PR.E	Q96QU8	1.1		K.TESPVLTSSC*R.E	Q9H3U1	1.45		R.GRAEVLISTVGPEDC*VVPFLTRPK.V	P56192	1.49
K.TVTEGESSVVLLQEHPC*LVELLSHVLK.V	Q6PJG6	1.1		K.C*GGIVGIQTK.T	O60443	1.45		R.ALC*GLDESK.A	P36776	1.49
R.TWYVQATC*ATQGTGLYEGLDWLSNELSKR.-	P18085	1.1		R.C*LLSDELSNIAMQVR.K	Q86YH6	1.45		R.C*DPVDYSNSPEALR.M	Q9BW60	1.49
K.VIFLQGGGC*GQFSAVPLNLIGLK.A	Q9Y617	1.1		K.EAVLSC*SQALK.I	Q6PGP7	1.45		K.C*YPEIKEKEEMRK.I	Q9UG63	1.49
K.VMEMYQPSAVVLQC*GADSLSGDR.L	Q92769	1.1		R.ETC*STLAESPR.N	Q6P2E9	1.45		K.TLVAGTIWNLKDIIPC*K.S	Q7Z4Q2	1.49
R.AQLTQLFLASVLEC*PFYKGPK.L	Q14CZ7	1.09		K.GC*LELIK.E	P11586	1.45		K.ETGC*MVYEK.L	Q9H2H9	1.49
R.GC*ITIIGGGDTATCCAK.W	P00558	1.09		K.GLGLPGC*IPGLLPENSMDCI.-	Q9NVP2	1.45		R.ELLTEFGYKGEETPVIVGSALC*ALEGRDPELGLK.S	P49411	1.49
K.RTIQFVDWC*PTGFK.V	Q71U36	1.09		K.GLGLPGCIPGLLPENSMDC*I.-	Q9NVP2	1.45		K.GSRHPC*ITK.T	P52701	1.49
K.ATQC*VPKEEIKDDNPHLK.N	Q9HAV7	1.09		R.GQDDLVVC*LHR.S	B0I1T2	1.45		R.VRPGFC*FHLC*SR.A	Q08211	1.49
K.EMFPYEASTPTGISASC*R.R	P42167	1.09		R.LTWHSC*PEDEAQ.-	Q13185	1.45		R.GGYRPSDLC*VSAPTGSGK.T	Q8N8A6	1.49
K.NADMSEEMQQDSVEC*ATQALEKYNIEK.D	P63167	1.09		R.NVTC*QDTR.H	E9PBQ3	1.45		K.WEALHAAECPC*GPSLIR.F	P53701	1.49
R.GNPVPILIPC*HR.V	P16455	1.09		R.NVTC*QDTR.H	Q8N511	1.45		R.VLAELPQC*LR.K	Q9BZG1	1.48
R.TSESLC*QNNMVILK.L	O14980	1.09		R.QYAAC*EQR.L	Q96E22	1.45		R.SC*FEDPEWKQLMGQVLAK.V	Q9BQG0	1.48
R.SWLADVAEKDPDEDC*R.T	Q9Y4R8	1.09		R.SLDTASVDLC*IKPK.T	Q9NVH6	1.45		R.AEGLATGFC*R.D	Q0PNE2	1.48
K.VRPSTGNSASTPQSQC*LPSEIEVK.Y	Q9UJX3	1.09		R.YAEC*GLR.I	P36969	1.45		R.LKQFLEC*SR.S	Q9UI26	1.48
R.VIGVELC*PEAVEDAR.V	Q8IZ69	1.09		K.LIKDDFLQQNGYTPYDRFC*PFYK.T	P38606	1.45		R.AYEYVEC*PIR.G	P53701	1.48
R.AEGLATGFC*R.D	Q0PNE2	1.09		R.KPTDGASSSNC*VTDISHLVR.K	P49321	1.44		K.ELLC*QLLTSLHHFVGEGESKR.S	Q9NU22	1.48
K.KCGVC*QK.T	P21291	1.09		K.DMAGLLKPTAC*TMLVSSLR.D	P11498	1.44		R.KELVNAQC*AK.F	Q9Y3C7	1.48
K.EGAPSLLC*K.Y	Q9UBB6	1.09		K.NENLQNLLC*GSGAGVISK.T	Q9HC21	1.44		R.EQIDNLATELC*R.I	O95295	1.48
R.GGQDC*R.G	Q9C0J8	1.09		R.AC*LQAVK.Y	O14817	1.44		K.ETIGVGSYSEC*KR.C	Q15418	1.48
R.RGQIC*WYQKPGVGLDAINDANLLEACIYR.L	P14324	1.09		K.AVCGQC*ER.A	O15304	1.44		R.SKGYGFITFSDSEC*AKK.A	Q14498	1.48
K.LC*PFQEK.I	P32780	1.09		R.C*LGIPNTAHFANVTQIEDAVSLWAK.L	Q12874	1.44		K.RLAHC*EELR.A	O60841	1.48
K.LGC*C*VVEKPQPK.K	Q9NRR8	1.09		K.LKESAQCVGDEFLNC*K.L	Q9Y5X2	1.44		R.LSC*PITALGR.T	Q8IY37	1.48
R.KLNPPDESGPGC*MSC*K.C	P01112	1.09		K.GC*YIGQELTAR.T	Q5T440	1.44		R.MIVSSTSANC*SHQVK.Q	Q8IWA4	1.48
R.QAVC*EAR.R	Q8WUP2	1.09		R.GFSAISC*TVEGAPASFGK.S	Q96EY5	1.44		R.SSTETC*YSAIPK.A	O75369	1.48
K.TASGWALALC*R.W	Q9NRG9	1.09		R.ISEAC*SLAQQSGDHR.L	P52948	1.44		R.SVC*TEAGMFAIR.A	P35998	1.48
R.VLYTC*FQSIQAQK.S	P46736	1.09		K.IVDGAC*LNHFTR.I	O60921	1.44		K.SVLVC*K.N	Q15021	1.48
R.C*ASCPYLGMPAFKPGEK.V	Q6FI81	1.09		R.LSRPLEC*AC*FR.T	Q7L523	1.44		K.VTFSC*AAGFGQR.H	Q14203	1.48
K.ADETKDEQFEQC*VQNFNK.Q	O00499	1.08		R.SDMICGYAC*LK.G	P42575	1.44		K.YYLC*GFC*PAELFTNTR.S	O95232	1.48
R.KICALDDNVC*MAFAGLTADAR.I	O14818	1.08		R.TIQFVDWC*PTGFK.V	Q71U36	1.44		K.SLIDNFALNPDILC*SAKR.L	Q5UIP0	1.48
K.AC*FQVGTSEEMK.M	P35658	1.08		R.GTDEC*AIESIAVAATPIPK.L	P53634	1.43		K.GEAGQNLLEMMAC*DR.L	P49792	1.47
K.AHC*KEVIKEK.G	Q9NPA8	1.08		R.TLTGTVIDSGDGVTHVIPVAEGYVIGSC*IK.H	P61158	1.43		K.LFEDELTLDNLTRPQLVALC*K.L	O95202	1.47
R.KFQYGNYC*K.Y	Q7L2J0	1.08		K.TGDSVFLC*FQK.V	P51157	1.43		R.SNLQEIFLPAFPC*HER.K	Q9NPG8	1.47
R.GEFC*SQGVR.E	Q9UID3	1.08		R.AAAGGLAMLTSMRPTLC*SR.I	Q9H3U1	1.43		K.ALSAFLTC*GNWK.Q	O95163	1.47
K.GNC*SQHDR.A	Q9BRX2	1.08		K.AVEC*VESTGR.H	Q9Y5J5	1.43		R.LNIISNLDC*VNEVIGIR.Q	P30153	1.47
R.KGNC*SQHDR.A	Q9BRX2	1.08		K.GAEPETGSAVSAAQC*QVGPTR.E	Q9UI10	1.43		R.LNIISNLDC*VNEVIGIR.Q	P30154	1.47
K.GVLEC*KPGEASVFQQPK.T	Q96KP1	1.08		R.LC*SSEVGLLK.N	Q9NWC5	1.43		K.AGEVVPPAMYQFSQYVC*QQTGLQIPQLPAPPK.I	Q5XKP0	1.47
K.NISQC*MTPDQLMTLCK.A	Q7Z4Q2	1.08		R.SLSSLELFLSC*AQK.Q	Q7Z6B0	1.43		R.C*GVTSVPDIRR.C	Q9H0C8	1.47
R.QC*DPSER.K	Q5VT66	1.08		R.TSLDLYANVIHC*K.S	P51553	1.43		R.KDLLVENVPYC*DAPTQKQ.-	Q5U5X0	1.47
K.SC*PQWNSLSTC*HIR.M	Q8N682	1.08		R.LSQEC*PIKEVVLYVKEEMKR.N	Q9Y6E2	1.42		R.KVEEVTKVC*EGR.R	P37198	1.47
R.SFLAGGIAGC*C*AK.T	P16260	1.08		K.KAC*QVTQSR.N	Q14919	1.42		R.AGQPHSSSDAAQAPAEQPHSSSDAAQAPC*PR.E	P29372	1.47
R.VLGPC*SDILKR.N	P10644	1.08		R.AHSNPDFLPVDNC*LQSVLGQR.V	Q5VSL9	1.42		K.AQANC*R.V	Q9HAV4	1.47
R.KVVDC*SR.E	P30825	1.08		K.TPDGQGLSTYKELC*SLASDLSQPDLVYK.F	Q5VYK3	1.42		R.C*IQAC*GQER.G	Q96FC9	1.47
K.ITLNDLIPAFQNLLKDC*EAEVR.A	P30154	1.07		K.FASHC*LMNHPDLAKDLTEYLK.V	Q29RF7	1.42		K.C*LAQEVNIPDWIVDLR.H	Q9Y4W2	1.47
K.VVYSGDTMPC*EALVR.M	Q9BQ52	1.07		K.FASHC*LMNHPDLAKDLTEYLK.V	Q9NTI5	1.42		R.AGDKDDITEPAVC*ALR.H	P14923	1.47
K.TTGLVGLAVC*NTPHER.L	Q16718	1.07		K.SLIDNFALNPDILC*SAK.R	Q5UIP0	1.42		K.GEYC*QTR.Y	Q06587	1.47
R.IVVEHIIMKPAC*PLFVR.R	P57088	1.07		R.KVEEVTKVC*EGR.R	P37198	1.42		R.IC*NAVSPDKDVDGFHVINVGR.M	P13995	1.47
R.ASTASPC*NNNINAATAVALQEPR.K	Q71RC2	1.07		K.YTIVVSATASDAAPLQYLAPYSGC*SMGEYFR.D	P25705	1.42		R.IESYSC*K.M	Q9H063	1.47
K.C*SEKDSIR.I	Q9H3U1	1.07		K.APLVC*LPVFVSR.D	Q9H0W9	1.41		R.IPDIVLWPTC*HDDVVK.I	O00116	1.47
K.EQIQMDDYGLC*QC*CK.A	Q92990	1.07		K.LNCQVIGASVDSHFC*HLAWVNTPK.K	Q06830	1.41		R.LTWHSC*PEDEAQ.-	Q13185	1.47
R.ESNC*YDPER.V	Q00610	1.07		R.RVC*VTFR.E	Q9NXW9	1.41		R.NHDGEC*TAAPTNR.Q	Q12769	1.47
R.LTWHSC*PEDEAQ.-	Q13185	1.07		R.AALETDENLLLC*APTGAGK.T	O75643	1.41		K.QAFTDVATGSLGQGLGAAC*GMAYTGK.Y	P29401	1.47
R.KQSSQIQNSAC*ILASWVSGK.F	Q6PJ69	1.07		R.AITIANQTNC*PLYITK.V	Q16555	1.41		K.QVTSAEEC*K.Q	Q9Y5L0	1.47
R.SFGAEEHEVC*R.Y	E7ENX8	1.07		K.C*GAQAGIK.I	Q9BTC0	1.41		R.STFQAHLAPVVC*PK.Q	Q9P2X3	1.47
R.SFGAEEHEVC*R.Y	Q03519	1.07		K.C*GVPFTDLLDAAK.S	Q01433	1.41		R.TVTC*PMSGKPLR.M	Q9Y314	1.47
R.SIAC*WTLSR.Y	O14787	1.07		K.GFSC*VK.N	Q9Y244	1.41		R.VQLTTC*IHHIIK.H	O95373	1.47
R.QMTEQVRSIC*K.I	Q9BW27	1.07		K.GLYGGSSYVDFLC*CVHK.E	O94855	1.41		R.YC*PSIESK.V	Q9Y2Z2	1.47
K.SLIDNFALNPDILC*SAK.R	Q5UIP0	1.07		K.IAELLC*KNDVTDGR.A	P49792	1.41		R.YYLQVC*QSSGGIPK.N	Q9NVI1	1.47
-.MREC*ISIHVGQAGVQIGNACWELYCLEHGIQPDGQMPSDK.T	Q71U36	1.06		K.IAELLC*KNDVTDGR.A	Q99666	1.41		K.LAGAFLAC*AHLR.A	Q96D53	1.47
R.VATFHDC*EDAARELQSQIQEAR.A	Q9P2X0	1.06		R.LAYVSC*VR.Q	Q8IY17	1.41		R.RAYC*EGCYVATLEK.C	Q15654	1.47
R.LC*AAAASILGK.P	A6NHG4	1.06		-.MRPGGERPVEGGAC*NGR.S	Q8IYS1	1.41		K.VAC*ITEQVLTLVNKR.I	P04843	1.46
R.LC*AAAASILGK.P	P30046	1.06		R.QC*PLALDAILGLLSLSVK.G	Q9UJX3	1.41		K.KC*TLDQAFR.G	Q96FV9	1.46
K.KLPEEEAEC*YFHSRPK.S	Q9NVS9	1.06		K.RSVSHPGSC*SSER.S	Q9HB20	1.41		R.ENPVVPIGC*LATAAALTYGLYSFHR.G	Q9BW72	1.46
R.QLLDFSQKLDINLLDNVVNC*LYHGEGAQQR.M	O14980	1.06		R.VQVSDPESTVAVAFTPTIPHC*SMATLIGLSIK.V	Q9Y3D0	1.41		R.EC*GNAHYQR.A	Q14318	1.46
K.LGC*QDAFPEVYDKIC*K.A	Q15392	1.06		R.EKVGEC*EASAMLPLEC*QYLNK.N	Q9H3P2	1.41		R.EREQHIAEC*MAK.M	Q8TAE8	1.46
K.AHFQNFPNGVTDFIKSEC*LNNIGDSSPLIR.A	Q92973	1.06		R.LALFNPDVC*WDRNNPEPWNKLGPNDQYK.F	O00483	1.4		K.ELIEPVLTC*FNDADSR.L	Q08AM6	1.46
R.ISPDKLNFILC*DK.L	O60921	1.06		K.NAIDDGC*VVPGAGAVEVAMAEALIK.H	P40227	1.4		R.IGSSLYALGTQDSTDIC*K.F	Q9UNH7	1.46
R.FC*LIC*NYVSR.I	P35249	1.06		K.LISDAGYQGEITSVSTAC*QQLEVFSR.V	Q8IXH7	1.4		R.ALVGLC*K.L	Q9H3U1	1.46
K.EQLVETC*R.L	Q9UBT7	1.06		K.YSNSALGHVNC*TIK.E	Q9NQC3	1.4		R.AVGIWHC*GSC*MK.T	P61513	1.46
K.AEAEAASEVWC*R.R	O95081	1.06		R.DIKWDFTPC*K.N	P38606	1.4		R.C*GSVLVR.L	P15880	1.46
K.AFSPGLPPQSC*SLNLKQDSYKK.-	Q8N6M3	1.06		K.ITNSLTVLC*SEK.Q	O75822	1.4		K.KFLSFMNLTC*AVGTTGQK.S	Q7Z5K2	1.46
R.AGGLQDSDTEDEC*WSDTEAVPR.A	Q9H6H4	1.06		R.YYEKPC*R.R	P82921	1.4		R.LLEAVGGPDC*HLREFEPDAIGGGAK.Q	Q8WU76	1.46
R.C*IQVEITPTSSR.I	Q9BYI3	1.06		R.EIDC*LSPEAQK.L	Q32MZ4	1.4		R.LSVLDLVVALAPC*ADEAAISK.L	Q5JTH9	1.46
R.KIQC*WFR.H	Q8N5B7	1.06		K.EQIQMDDYGLC*QCCK.A	Q92990	1.4		R.NQYC*YGSR.D	Q7L8L6	1.46
R.LHQDC*ALR.M	Q5VV42	1.06		R.ESPVSAPLEGLIC*R.A	O75376	1.4		R.QC*DPSER.K	Q5VT66	1.46
R.NLSGQPNFPC*R.V	Q9HD45	1.06		R.GFNKETAAAC*VEK.-	Q15631	1.4		R.SLLETNEIPSLILWGPPGC*GK.T	Q96S55	1.46
K.NQC*LFTNTQCK.V	Q9UL40	1.06		K.HSMNPFC*EIAVEEAVR.L	P38117	1.4		K.ANAAAMC*AK.A	P18583	1.45
K.YASLC*GK.S	P42345	1.06		R.IPGPVC*K.G	Q8TDN6	1.4		K.NIIQPPSCVLHYYNVPLC*VTEETFTK.L	Q8WVV9	1.45
R.AAGDGDC*GTTHSR.A	Q3LXA3	1.05		R.EKLDLQHC*VLPSR.L	Q9BXW9	1.4		R.IDC*FLPHLRDELFK.Q	Q92538	1.45
K.TILQC*ALNRPAFFAER.L	P20073	1.05		R.EKLMHLFTSGDC*K.A	Q8WXD5	1.4		R.SLPPVMAQNLSIPLAFAC*LLHLANEK.N	Q15003	1.45
R.MAAASTLVTWLQC*VK.G	Q86Y56	1.05		K.MLQDC*PK.A	P49137	1.4		R.DC*GGAAQLAGPAAEADPLGR.F	Q9Y508	1.45
K.KYVSVC*EGPLKEQEWNTTNAK.Q	A6NDU8	1.05		R.TASLVLSLPAAQYC*LQR.V	Q9H4I3	1.4		R.IFTHHLC*R.A	Q9BQG0	1.45
K.MSAFKENC*GIYFPEIK.R	Q5TFE4	1.05		R.VAPPYPHLFSSC*SPPGMVLDGSPK.G	Q9BUK6	1.4		R.C*EEYPLTR.A	Q92621	1.45
K.AQLSGLQLQPC*LYK.R	O43159	1.05		R.VVLAEDC*WMK.S	Q9BSE5	1.4		R.KFQYGNYC*K.Y	Q7L2J0	1.45
R.VEYASKVDENFDC*VEADDVEGK.I	O14929	1.05		K.SEFYANEAC*KR.L	P49753	1.39		K.LAENTSC*DFLPR.F	Q8WXE1	1.45
R.NTWDC*GLQILK.K	P53007	1.05		R.IHEGC*EEPATHNALAK.I	Q00610	1.39		K.LGC*QDAFPEVYDKIC*K.A	Q15392	1.45
K.APPPSLTDC*IGTVDSR.A	Q9NZZ3	1.05		K.AC*LPDAK.T	O15091	1.39		R.LPC*YFENLLSHFLPQKAPDGK.S	Q9HBL8	1.45
K.C*DDAIITK.A	Q9UPT9	1.05		K.HPLTQELKEC*EGIVPVPLAEK.L	P82932	1.39		K.NENLQNLLC*GSGAGVISK.T	Q9HC21	1.45
R.DLQPFPTC*QALVYR.G	Q14137	1.05		R.GNYSTDQLC*VLDNVK.M	Q7Z4Q2	1.39		R.IRPLNSEGTLNLLNC*EPPR.L	Q9Y5S2	1.45
R.ENPDLAC*LQSIIFDEERSPEEQAK.T	O95801	1.05		K.TYC*CDLK.M	Q9Y6C9	1.39		K.NREC*LLSAPR.K	Q86XI2	1.45
K.GGEIC*EQLR.A	E7ERL9	1.05		K.IIC*QGFTGK.Q	P53597	1.39		K.QEASKPPRGC*PQANR.G	Q8IVT2	1.45
R.GVAGAHGLLC*LLSDHVDKR.I	Q9UBQ7	1.05		R.C*QQPAVIFIDEIDSLLSQR.G	Q6PIW4	1.39		K.GDLENAFLNLVQC*IQNKPLYFADR.L	P07355	1.44
K.INEAVEC*LLSLK.A	P07814	1.05		R.ILQEIESTDTAC*VGPTLR.S	Q8TAG9	1.39		R.EKEHYC*LADLASLMDK.T	Q92552	1.44
K.MDCQEC*PEGYR.V	P21333	1.05		R.MNC*VLATYGSIALIVLYFKLRSKKTPAVK.A	Q96IX5	1.39		R.ALCDVGTAISC*SR.V	E9PLN8	1.44
K.NAGNC*LSPAVIVGLLK.E	O43175	1.05		R.THPSAAVPVC*PR.S	Q3KQU3	1.39		R.ALCDVGTAISC*SR.V	Q9BQB6	1.44
K.VFFVESVC*DDPDVIAANILEVK.V	O60825	1.05		R.VQYLEDTDPFAC*ANFPEPR.R	Q9Y613	1.39		K.SSGQSAQLLSHEPGDPPC*LR.R	Q8N1F7	1.44
K.GIRDTQC*GFK.L	Q9Y673	1.04		K.DAVAHC*HEAER.N	P49792	1.39		R.MAQDLKDIIEHLNTSGAPADTSDPLQQIC*K.I	P37198	1.44
K.VIEQLGTPC*PEFMKK.L	P45983	1.04		K.DAVAHC*HEAER.N	Q99666	1.39		R.LVRDNDC*LR.V	P38432	1.44
K.VIEQLGTPC*PEFMKK.L	P53779	1.04		K.KETGAASFLC*R.Y	P29144	1.38		K.RYAIC*SALAASALPALVMSK.G	P36578	1.44
K.TSSVSNPQDSVGSPC*SR.V	P49023	1.04		R.AISTIC*SLEK.K	Q9UJX3	1.38		K.MTNHC*VFSANEDHETIR.N	Q9Y6E2	1.44
K.SSGQSAQLLSHEPGDPPC*LR.R	Q8N1F7	1.04		R.C*LGTHQETR.C	O43257	1.38		K.LFFIQAC*GGEQK.D	P55211	1.44
K.AADSTSQC*GK.A	Q6VMQ6	1.04		R.LLSAAC*R.L	P49327	1.38		K.EALPVSLPQIPC*LSSFK.I	Q9UHI6	1.44
K.AAELLMSC*FR.V	Q5JVF3	1.04		R.LMQC*VSSFSK.N	Q96KP1	1.38		R.AIMNYQSGFSLVMNHPAC*VNEIALSLNNKNPR.T	O95466	1.44
R.AC*AVEVK.R	Q8WX92	1.04		K.LSDFGLC*TGLK.K	Q15208	1.38		R.AISTIC*SLEK.K	Q9UJX3	1.44
K.C*SFDVVK.R	Q9Y678	1.04		K.LSDFGLC*TGLK.K	Q9Y2H1	1.38		K.ATNVC*TRFEDSPSYVK.W	O60264	1.44
R.YKEALEQC*R.Q	E7ENX8	1.04		K.YYRPTEVDFLQGDC*TK.A	O60547	1.38		K.AVYSTNC*PVWEEAFR.F	Q9BSJ8	1.44
R.YKEALEQC*R.Q	Q03519	1.04		R.SEEAPAGC*GAEGGGPGSGPFADLAPGAVHMR.V	Q9BUL9	1.38		R.KLSAEHKEFITALIPEVILC*TK.E	Q5JTH9	1.44
R.EVC*PVTHRPALYRDPVTDIPYATAR.A	Q15906	1.04		R.GGGRTEDGHSC*GASRE.-	Q8N0V3	1.38		K.MSAFKENC*GIYFPEIK.R	Q5TFE4	1.44
K.KLEEVVQILGDKFPC*TLVAQK.I	Q9BY32	1.04		K.LGSAVVTRGDEC*GLALGR.L	P54886	1.37		R.GPC*QESFYNLGR.G	Q9Y5Q9	1.44
R.LAC*GVIGIAQ.-	P00441	1.04		R.KQC*VDHYNEVK.S	O95299	1.37		K.IAAYLQSDQFC*K.M	P21266	1.44
R.LC*LIQPFIDLR.Q	Q96EN8	1.04		K.LGNNC*VFAPADVTSEKDVQTALALAK.G	Q99714	1.37		R.ILLQHIC*AK.V	P42695	1.44
R.RLC*QENQWLRDELANTQQK.L	E7EVH7	1.04		K.GMTSLQC*DC*TEKLQNKFDFLR.S	Q9BTE7	1.37		K.ITENYDC*GTKLPGLLK.R	Q9NUQ8	1.44
R.RLC*QENQWLRDELANTQQK.L	Q07866	1.04		R.YHPLSSC*LTAR.L	Q96T76	1.37		R.IVQTLC*TVR.G	Q96D53	1.44
R.LLQSPC*VDTAPK.S	Q9NVC3	1.04		K.VPADTEVVC*APPTAYIDFAR.Q	P60174	1.37		R.MTEEPLMC*AYC*VTEPGAGSDVAGIK.T	P11310	1.44
K.LVSIPDEIFC*EEIAK.A	Q96E29	1.04		K.VTPLQQMLASC*TGAILTSVIVTPLDVVK.I	Q8TBP6	1.37		R.IKNPFLSLAAC*VMPSR.L	Q92616	1.44
K.MLDDNNHLIQC*IMDSQNK.G	Q15532	1.04		R.ITADQALKHPWVC*QR.S	Q13555	1.37		R.RKPC*SRPLSSILGR.S	P29353	1.44
R.NVTC*QDTR.H	E9PBQ3	1.04		K.VIPTEC*AIK.V	O14730	1.37		K.SGDAAIVEMVPGKPMC*VESFSQYPPLGR.F	Q05639	1.44
R.NVTC*QDTR.H	Q8N511	1.04		R.DADADAGGGADGGDGRGGHSC*R.G	Q14657	1.37		R.SQDGDTAAC*SLIQAR.L	Q8N201	1.44
R.GRPC*LVPGK.Y	Q96E14	1.04		K.C*DLISIPK.K	Q9ULV4	1.37		K.YC*SGTGWPSFSEAHGTSGSDESHTGILR.R	Q9Y3D2	1.44
R.LYEFWWSLSRPC*PNSSVWVR.A	Q8TEQ6	1.04		R.YKEALEQC*R.Q	E7ENX8	1.37		K.NMMAAC*DPRHGR.Y	Q3ZCM7	1.44
R.TILVYSRPPC*QPQFSLTEPMKK.M	Q9NWV8	1.04		R.YKEALEQC*R.Q	Q03519	1.37		R.NMMAAC*DPRHGR.Y	Q9BUF5	1.44
R.SQSC*SDTAQER.A	Q8NCN4	1.04		K.EQSQPC*ADNAVLSSGLTAAR.-	P19784	1.37		K.RVTYDSDATSSAC*R.E	O15243	1.43
R.STC*SLTPALAAHFSENLIK.H	Q9BTA9	1.04		R.LSNC*ANR.T	O60502	1.37		K.KITIPLAC*K.I	Q9BX95	1.43
K.TFDTFC*PLGPALVTK.D	Q6P2I3	1.04		R.TGTELVLLTAAPPPPPRPGPC*AYAAHGR.G	Q96B36	1.37		R.C*GLQGHTGR.L	Q92508	1.43
K.VALLC*GPPGLGK.T	Q8WVB6	1.04		K.VGSFC*LSEAGAGSDSFALK.T	P45954	1.37		R.KAC*ADATLSQITNNIDPVGR.I	P62873	1.43
R.VGMGSGSIC*ITQEVLACGRPQATAVYK.V	P12268	1.04		R.AATMSAVEAATC*R.A	Q53H96	1.36		R.EAADDC*AK.A	Q92616	1.43
K.VLVTTNVC*AR.G	Q9NUU7	1.04		R.TVPFLPLLGGC*IDDTILSR.Q	Q7Z7H8	1.36		R.FLYEC*PWR.R	P11498	1.43
K.VVLDVGSGTGILC*MFAAK.A	Q99873	1.04		K.VQENSAYIC*SR.R	Q9Y3T9	1.36		R.IHC*LENVDK.A	O15020	1.43
K.YVGQNIGLSTC*R.H	Q9HBL8	1.04		R.VEKIPGGIIEDSC*VLR.G	P49368	1.36		R.IHC*LENVDK.A	P11277	1.43
R.LGC*NAGVSPSFQQHCVASLATK.A	Q13572	1.04		R.QYYAYLTDTQC*K.R	P48651	1.36		R.IHC*LENVDK.A	Q01082	1.43
R.IIKPC*NHVLSLSFPIRR.D	P00367	1.04		K.AGC*AVTSLLASELTK.D	O60610	1.36		R.LAYVSC*VR.Q	Q8IY17	1.43
R.IIKPC*NHVLSLSFPIRR.D	P49448	1.04		R.ALAAAAADPEGPEGGC*SLAWR.L	Q5K4L6	1.36		K.ISSTLKVEPC*SLTPGYTK.L	Q96EB1	1.43
R.GGHSC*R.G	Q14657	1.04		R.C*EEYPLTR.A	Q92621	1.36		R.VLVC*PIYTCLR.E	O43310	1.43
K.C*VLTHSPTWIIDPIDGTCNFVHR.F	O14732	1.03		R.GATGC*GK.T	Q08211	1.36		K.VC*NFLASQVPFPSR.L	Q99714	1.42
K.SKLTFSCLGGSDNFKHLNEIDLFHC*IDPNDSK.H	Q15185	1.03		R.GEDVDQLVAC*IESK.L	Q6P996	1.36		R.LAAPDPC*DPQR.W	O60831	1.42
K.GHALLIDC*R.S	P51570	1.03		R.LAGPFPATHYSTLC*KPAPLTGTLEVR.V	Q16512	1.36		R.LHPC*VMASLR.A	Q6NUM9	1.42
K.YGWSADESGQIFIC*SQEESIKPK.N	Q9UBQ5	1.03		K.TMDAGC*KPYMAPER.I	P46734	1.36		K.SISLASC*HQLHSK.F	O75691	1.42
R.VEKIPGGIIEDSC*VLR.G	P49368	1.03		K.GGSYSQAASSDSAQGSDVSLTAC*KV.-	P01891	1.36		R.TSESLC*QNNMVILK.L	O14980	1.42
R.LPADTC*LLEFAR.L	Q8NF37	1.03		K.GGSYSQAASSDSAQGSDVSLTAC*KV.-	P01892	1.36		R.VGMGSGSIC*ITQEVLAC*GRPQATAVYK.V	P12268	1.42
K.LC*DFGISGQLVDSIAK.T	P45985	1.03		K.GGSYSQAASSDSAQGSDVSLTAC*KV.-	P05534	1.36		R.MHSVGIC*GSDVHYWEYGR.I	Q00796	1.42
K.SLSGGASYVDFLC*HMHK.E	P53992	1.03		K.GGSYSQAASSDSAQGSDVSLTAC*KV.-	Q09160	1.36		K.AENC*VK.L	Q96GA3	1.42
K.LC*FLDKVEPHATIAEIK.N	Q9NZ01	1.03		R.KREC*GNAHYQR.A	Q14318	1.36		K.ALC*AEFK.M	Q9NR50	1.42
R.SVLGGDC*LLK.F	P41240	1.03		K.KEEC*PAVR.L	P07237	1.35		R.ALC*AIASLGSSDLLPQEHILLR.T	Q96N21	1.42
K.AAVPLGGFLC*NVADK.S	Q7L8L6	1.03		K.MVAAVAC*AQVPK.I	Q9HCC0	1.35		R.KVEKLEQQC*QK.E	O00471	1.42
K.C*IVSVAGGATR.A	Q96GQ5	1.03		K.QGVEYVPAC*LVHR.R	Q15527	1.35		R.LGDLLISQFSGPSAEQMC*K.T	Q92974	1.42
K.C*LQNPSSDIR.L	Q92616	1.03		R.RFTSGQC*QVR.V	Q99943	1.35		R.AKNEC*YR.A	Q66K14	1.42
R.FLSDHPYLVC*EETAK.Y	Q7L3B6	1.03		K.ALVEFTNSPDC*LSK.C	Q9UIA9	1.35		K.SASLDNGGC*ALTTFSVLEGEKNNHR.A	P35610	1.42
K.LGC*FEIAK.M	O60502	1.03		R.FLC*LEFSQVNNPLISR.L	Q5HYK3	1.35		K.TGQPEELVSC*SDC*GR.S	Q92785	1.42
K.MPAC*NIMLLGAQR.K	Q8WWY3	1.03		R.C*GC*VTMLK.S	Q9Y2X0	1.35		K.TPAQEC*KPADFEVPETFLNR.L	Q86U38	1.42
K.LKPYMSFLTQC*RPLSASMHNAIK.F	Q9UI10	1.03		R.DSAQC*AAIAER.L	Q96RS6	1.35		K.VACC*PLER.C	Q15021	1.42
K.SFEC*LLGLNSNIGIR.D	Q9Y5N6	1.03		R.GTC*SRPDTEC*K.F	Q9NR56	1.35		K.VC*NNPGLYSNPDLSAAASLALGK.F	Q15021	1.42
K.SLVC*TALR.G	O43427	1.03		R.KIVEAC*K.A	Q9NT62	1.35		R.VGSDMTSQQEFTSC*LK.E	P40855	1.42
R.TASLVLSLPAAQYC*LQR.V	Q9H4I3	1.03		R.QASLADC*LNHAVGFASR.T	O43592	1.35		R.VTC*AC*QEHR.T	Q9BZG1	1.42
R.TENHGAPAC*HR.L	Q9NUW8	1.03		R.SLYIC*DPFSGVVFDHLKK.L	Q92547	1.35		K.NC*MTDLLAK.L	Q00765	1.42
R.TMC*AVLGLVAR.Q	Q9Y679	1.03		R.SIAC*WTLSR.Y	O14787	1.34		K.RPACTLKPEC*VQQLLVCSQEAK.K	P32320	1.41
R.TPGAATASASGAAEDGAC*GC*LPNPGTFEECHRK.C	O96008	1.03		R.SRQDPGTDRTEDSGLAAGPPEAAGENFAPC*SVAPGK.S	Q96CP2	1.34		R.FWQAHSGIC*TR.T	Q9BVC4	1.41
K.VACC*PLER.C	Q15021	1.03		R.GTEAGQVGEPGIPTGEAGPSC*SSASDKLPR.V	O15355	1.34		K.RRLDEC*EEAFQGTK.V	P61289	1.41
K.VDENFDC*VEADDVEGK.I	O14929	1.03		R.VTC*IDPNPNFEK.F	Q9H8H3	1.34		K.EKLNLSC*IHSPVVNELMR.G	Q9Y2X3	1.41
R.VFVLPC*IQQIQR.I	O75955	1.03		K.C*LQQALHTFQNDIHVYPIWLC*PFILPSQPGLVHPK.G	Q15392	1.34		K.GLLIQDAHFHQLLC*LLNSQIASVWHGTLSK.L	Q969Z0	1.41
R.ATSGGKWPQVLFFPEGTC*SNKK.A	Q643R3	1.03		K.GLKDGTILC*TLMNK.L	Q99439	1.34		R.AAVEEGIVLGGGC*ALLR.C	P10809	1.41
R.TILVYSRPPC*QPQFSLTEPMK.K	Q9NWV8	1.03		K.EAAC*ESSTPSWASDHNYNAVKPEK.T	Q9BTC0	1.34		K.QTISNAC*GTIGLIHAIANNKDK.M	P15374	1.41
R.KIC*ALDDNVCMAFAGLTADAR.I	O14818	1.03		R.GAGSSSGC*GGPK.G	Q9BX10	1.34		R.LALFNPDVC*WDRNNPEPWNK.L	O00483	1.41
R.KGAVPTDKAC*ESASHDNQSVR.M	Q8TBZ6	1.03		K.LC*PFQEK.I	P32780	1.34		K.KALSELTTC*LR.E	Q9P246	1.41
R.LTVVDTPGYGDAINC*RDC*FK.T	Q15019	1.02		R.LDC*AQLK.E	P09543	1.34		K.IC*VNGDDAHPLWK.W	P36969	1.41
K.ATC*IGNNSAAAVSMLKQDYK.E	P25789	1.02		R.LLQNC*NDDSLNVALPMR.M	Q15386	1.34		K.IIPDC*SMESTK.S	P22415	1.41
K.LRELSFSGIPC*EGGLR.C	Q9NVG8	1.02		R.NALVSHLDGTTPVC*EDIGR.S	P31930	1.34		R.SSGC*FPNMAAK.V	Q96I24	1.41
K.LAEAHPDC*LMLNFTVK.L	Q8IXH7	1.02		K.TDSPSC*EYSR.F	Q9HAV4	1.34		R.TASLVLSLPAAQYC*LQR.V	Q9H4I3	1.41
R.SGVIVLPC*GAGK.S	P19447	1.02		K.VLEFNC*R.F	P22102	1.34		R.SGGSGGCSGAGGASNC*GTGSGR.S	Q15005	1.41
R.MAQDLKDIIEHLNTSGAPADTSDPLQQIC*K.I	P37198	1.02		R.YLC*DFTYYTSLYQSHGR.S	Q9NXJ5	1.34		R.WFPAVC*AHSK.K	P55265	1.4
K.ILLENVLKPLHFTYNSC*PEGAR.Q	Q15386	1.02		R.VC*FVTSMMTGR.A	Q86TG7	1.33		K.VAQATC*K.L	P35914	1.4
K.KLNC*QVIGASVDSHFC*HLAWVNTPK.K	Q06830	1.02		K.LC*DFGISGQLVDSIAK.T	P45985	1.33		R.IFANTPDSGC*VLGMR.K	P08237	1.4
R.VLQNMEQC*QK.K	Q96ER3	1.02		K.ENC*GIYFPEIK.R	Q5TFE4	1.33		R.QGSEEC*QK.F	Q14147	1.4
R.LLLGNKC*DMEAK.R	P51153	1.02		K.VQYPQSQAC*K.M	Q14204	1.33		R.ALVDGPC*TQVR.R	P50914	1.4
K.AC*VVHGSDLK.D	P05023	1.02		K.KPTPDKC*AADVK.A	O94903	1.33		K.KNC*PHVVVGTPGR.I	O00148	1.4
K.ALC*AEFK.M	Q9NR50	1.02		R.EC*SDVQPK.L	O43678	1.33		R.ALAAAAADPEGPEGGC*SLAWR.L	Q5K4L6	1.4
K.AYSFAMGC*WPK.N	O43414	1.02		R.GNEVC*R.K	O95081	1.33		K.SEGTYC*C*GPVPVR.A	P21980	1.4
K.C*VSSSHFQVAER.A	Q15172	1.02		K.LTDYC*K.K	P42704	1.33		R.AGTHILC*IK.D	P11498	1.4
K.FNPEAGANC*LVK.Y	O14777	1.02		R.EKLC*FLDK.V	Q9NZ01	1.32		R.AIQDDC*QVITAR.L	Q9UID3	1.4
K.GC*LLYGPPGTGK.T	P62333	1.02		R.LPADTC*LLEFAR.L	Q8NF37	1.32		R.C*LPHIVPNVLLAK.R	Q9P260	1.4
K.GC*YIGQELTAR.T	Q5T440	1.02		K.ILLENVLKPLHFTYNSC*PEGAR.Q	Q15386	1.32		K.GHSC*YRPR.R	P62753	1.4
K.GGGQEC*GDSR.A	O43149	1.02		K.TLEPIC*DADPSALAK.Y	Q5T8P6	1.32		K.KGVC*DQSFGIHVAELANFPK.H	P43246	1.4
K.GVLSGEEC*KK.Q	Q9NVI1	1.02		K.AGGC*C*HTFGK.N	Q6NUM9	1.32		R.LLASFFDRNTLANSC*GTGIR.S	Q96RE7	1.4
R.LLEGDGGPNTGGMGAYC*PAPQVSNDLLLK.I	P22102	1.02		K.C*DLSPWAVSR.D	O14966	1.32		K.STDFLPVDC*PVR.S	Q63HN8	1.4
R.TDVC*VFAAQEDLETMQAFAQVFNK.L	Q7L1Q6	1.02		R.C*GLACER.C	Q96FX8	1.32		R.TQEQC*VHNETKNELEK.M	O60313	1.4
R.TSALC*ADSYNASLAAYHPWVVR.R	Q5TA50	1.02		K.DDREAQSIC*ER.V	Q10567	1.32		K.VALLC*GPPGLGK.T	Q8WVB6	1.4
K.VC*IESEHSMDTLLATLK.K	O00244	1.02		K.GLQVGGC*EPEPQVC.-	P52888	1.32		R.VLGLGLGC*LR.L	Q9BRJ7	1.4
K.LSEQKEQLVETC*R.L	Q9UBT7	1.02		K.LLAAGVVSAMVC*MVK.T	Q9H3U1	1.32		R.RC*ATTPMAVHR.V	O95071	1.4
K.FAC*FER.T	Q00325	1.02		K.EIEPFLPPLKPDYC*VK.Q	Q8IZV5	1.32		R.KALC*DPLEEVR.E	Q92616	1.4
R.NACIEC*SVNQNSIR.N	Q9UBB4	1.01		K.RVPQC*PSGR.V	Q16186	1.32		K.MSPLSIVTALVDKIDMC*K.K	Q9Y305	1.39
R.VQVSDPESTVAVAFTPTIPHC*SMATLIGLSIK.V	Q9Y3D0	1.01		R.KVVGC*SC*VVVK.D	P25398	1.32		K.VNLQMVYDSPLC*R.L	Q9Y285	1.39
K.LGSAVVTRGDEC*GLALGR.L	P54886	1.01		R.YAALNLAALHC*R.F	Q9UJX4	1.32		K.RVPQC*PSGR.V	Q16186	1.39
K.LYGSLPLC*VLLER.A	Q9Y256	1.01		R.HKNMSVHLSPC*FR.D	P62280	1.31		R.LLQPDFQPVC*ASQLYPR.H	Q9UJW0	1.39
K.IYKLNEDMAC*SVAGITSDANVLTNELR.L	P25789	1.01		R.FLC*NSSQEWKR.L	Q8WUK0	1.31		K.LHYC*VSCAIHSK.V	F8VZW7	1.39
K.SWMEGLTLQDYSEHC*KHNESVVK.E	O00487	1.01		K.VIEQLGTPC*PEFMK.K	P45983	1.31		K.LAPGGHVGRFC*IWTESAFR.K	P36578	1.39
K.C*KTPQGQR.L	P43246	1.01		K.VIEQLGTPC*PEFMK.K	P53779	1.31		R.LIGPNCPGVINPGEC*K.I	P53597	1.39
K.TSSDPTC*VEKEK.V	O14980	1.01		K.TLTSGGHAEHEGKPYC*NHPCYAAMFGPK.G	P50238	1.31		R.LKNC*GCLGASPNLEQLQEENLK.L	P54136	1.39
R.DLGGIVLANACGPC*IGQWDRK.D	Q99798	1.01		K.YSNSALGHVNC*TIKELR.R	Q9NQC3	1.31		R.LKNCGC*LGASPNLEQLQEENLK.L	P54136	1.39
R.EIDC*LSPEAQK.L	Q32MZ4	1.01		-.MALVPC*QVLR.M	Q9NVV5	1.31		K.KNEPPLTC*PYSLK.A	Q9UGP8	1.39
R.FAAAPHIC*SDLK.F	Q96RD7	1.01		K.LSEEAEC*PNPSTPSK.A	O94804	1.31		K.NSNVDSSYLESLYQSC*PR.G	Q7Z2W4	1.39
K.GAC*YGDDACFVAR.H	Q8NI37	1.01		R.AAC*DLVR.G	P55060	1.31		R.ATPSC*PPEMK.K	Q6NUQ4	1.39
K.GC*ENLNIVQDK.I	Q7Z417	1.01		R.VYTSMSDC*LIK.T	Q9H936	1.31		R.GFNKETAAAC*VEK.-	Q15631	1.39
R.LHYGTDPC*TGQPFRFPLVSVR.N	Q8NFF5	1.01		R.KC*IQSILKEEGEHIR.E	Q99567	1.31		R.GLINLGNTC*FMNC*IVQALTHTPLLR.D	Q9UPT9	1.39
R.LLLGWAPGQPFSSCC*PDTGKTQDEGAR.A	Q9BQC3	1.01		K.ELIEPVLTC*FNDADSR.L	Q08AM6	1.31		K.GVFDC*R.T	P17858	1.39
K.LKAPPKPC*AGNQGTQITVEDLFYNIATR.R	P40692	1.01		K.FSAIQC*AAAVPR.A	Q15054	1.31		K.GVFDC*R.K	Q01813	1.39
R.LTLQKPSC*L.-	Q13309	1.01		R.FSTQGMGTFNPADYSDSTSTDVC*GTK.L	Q5T6F2	1.31		R.IVAQLLTC*MDDLNNVAATAR.V	O15381	1.39
K.VRSEEAPAGC*GAEGGGPGSGPFADLAPGAVHMR.V	Q9BUL9	1.01		K.LLPC*LHSFC*LR.C	Q9UPN9	1.31		R.LHTGPLPEQC*R.L	A0JLT2	1.39
R.KSYESSEDC*SEAAGSPAR.K	Q6P6C2	1.01		K.LTTPTYGDLNHLVSATMSGVTTC*LR.F	Q9BVA1	1.31		K.DMGYGNWISKPQEEKNFYLC*PV.-	P55265	1.39
R.TSC*GSPNYAAPEVISGR.L	P54646	1.01		R.TLKLTTPTYGDLNHLVSATMSGVTTC*LRFPGQLNADLRK.L	Q9BVA1	1.31		R.KPVVC*GVSSLGIDHTSLLGDTVEK.I	Q05932	1.39
R.TSC*GSPNYAAPEVISGR.L	Q13131	1.01		R.NSC*NVGGGGGGFK.H	Q7L2J0	1.31		R.SLAGQYSC*TATNPIGSASSSAR.L	Q8WZ42	1.39
R.VFQFC*LR.Y	Q9C0I1	1.01		R.KRPC*GPGEHGQR.I	Q5T280	1.31		R.STSSC*SSK.Q	Q9H4L5	1.39
R.YLAEC*R.A	Q9NVT9	1.01		R.SHFPGC*LAQEMQQQAQELLQK.Y	Q8TEQ6	1.31		K.SVVC*AFFK.Q	Q8WU90	1.39
K.YQLFAFISHMGTSTMC*GHYVCHIK.K	P45974	1.01		R.VLGPC*SDILKR.N	P10644	1.31		R.VNC*LAPGLIK.T	Q9BTZ2	1.39
R.FSPEFVDFTAQC*LR.K	P46734	1.01		K.GEAGQNLLEMMAC*DR.L	P49792	1.31		R.SAYALGGLGSGIC*PNR.E	P31327	1.38
R.RVQPQWSPPAGTQPC*R.L	P49589	1		K.YMAC*CLLYR.G	P68366	1.3		K.VC*EDLDTSVNLAWTSGTNCTR.F	P45880	1.38
-.MRECISIHVGQAGVQIGNAC*WELYCLEHGIQPDGQMPSDK.T	Q71U36	1		K.YMAC*CLLYR.G	Q71U36	1.3		R.NTPLC*DSFVFRK.V	O95573	1.38
K.QVTSAEECKQVC*WALRDFTR.L	Q9Y5L0	1		R.LWRQDGVLAVTC*AQEGVIR.V	O14734	1.3		K.AATGEEVSAEDLGGADLHC*RK.S	Q9HCC0	1.38
K.VTFSC*AAGFGQR.H	Q14203	1		K.TIDAGC*KPYMAPER.I	P52564	1.3		R.DDDRTPGLHGDC*DDDKYR.R	O95159	1.38
R.FLC*ESVFSYQVASTLK.Q	Q96DE5	1		R.SEGTPEKPLYHPC*VC*TGSIK.F	O60337	1.3		K.KLGEWVGLC*K.I	P25398	1.38
K.TVYALPTIAFAFVC*HPSVLPIYSELKDR.S	Q9H2H9	1		R.KGNC*SQHDR.A	Q9BRX2	1.3		K.LISEMCC*EAVK.K	Q8WTT2	1.38
R.KTFVGTPC*WMAPEVMEQVR.G	Q9UEW8	1		R.ALCDVGTAISC*SR.V	E9PLN8	1.3		R.SVC*LIGDKEQR.A	O60264	1.38
R.VKAC*TTEEDQEK.L	P49915	1		R.ALCDVGTAISC*SR.V	Q9BQB6	1.3		R.KVLCGDAGEDAEC*HAAK.L	O15397	1.38
R.LAPILC*DGTATFVDLVPGFR.R	O43264	1		K.GELLGC*FGLTEPNSGSDPSSMETR.A	Q92947	1.3		K.STLTDSLVC*K.A	P13639	1.38
R.SEVEEVDFAGWLC*K.T	P36507	1		R.TLVGIC*SEHQSR.T	Q9H3U1	1.3		R.AIQTVSCLLQGPC*DAGNR.A	Q9H3U1	1.38
K.VQEAPIDEHWIIEC*NDGVFQR.L	Q14353	1		R.AAC*CLAGAR.A	O95336	1.3		R.AQLC*NPGR.S	Q9H6K4	1.38
K.YSNSALGHVNC*TIKELR.R	Q9NQC3	1		R.AEVLISTVGPEDC*VVPFLTRPK.V	P56192	1.3		R.C*QAAEPQIITGSHDTTIR.L	O43660	1.38
K.C*STPEEIKKR.K	P60981	1		R.TTASEPVEQSEATSKDC*SR.L	Q15007	1.3		R.ISEAC*SLAQQSGDHR.L	P52948	1.38
R.EKLGC*QDAFPEVYDKIC*K.A	Q15392	1		K.GC*ENLNIVQDK.I	Q7Z417	1.3		R.NFVGPPHFQVIC*R.L	Q7L576	1.38
K.SRDFNEEC*PR.L	Q13418	1		R.RGNVC*GDSK.S	Q05639	1.3		K.VKPQC*K.E	Q9H869	1.38
K.SFVQWLGC*R.S	O60502	1		K.GSEC*YQK.S	P30260	1.3		K.QALC*VAAQLNFTKDQLVGLGR.T	O95163	1.38
R.WTQTLSELDLAVPFC*VNFR.L	Q9Y266	1		K.KGVC*DQSFGIHVAELANFPK.H	P43246	1.3		R.QLFALSC*TAEEQGVLPDDLSGVIR.R	P04899	1.38
R.TGTELVLLTAAPPPPPRPGPC*AYAAHGR.G	Q96B36	1		K.VKLEC*NPTAR.I	P47736	1.3		K.SC*QFVAVR.R	P07814	1.38
R.YATTGKC*ELENCQPFVVETLHGK.I	Q06203	1		R.LQTEAQEDDWYDC*HR.E	Q9UHI6	1.3		R.EASFSPTDNKFATC*SDDGTVR.I	Q9C0J8	1.38
K.C*GLVIGR.G	Q92945	1		K.SSLSC*SLQEGLIPGSQFWDASK.T	P52701	1.3		K.GIIDC*VVR.I	P05141	1.37
R.ELALEC*DYQR.E	Q8NI60	1		K.TSSVSNPQDSVGSPC*SR.V	P49023	1.3		K.GIIDC*VVR.I	P12235	1.37
R.SDEPARDDAAVETAEEAKEPAEADITELC*R.D	Q6QNY1	1		R.C*LSDPAEGCR.A	Q86Y56	1.3		R.AVGDGILC*NTYIDSYK.G	Q53EL6	1.37
R.ESC*TAHAASQAATQR.K	Q9NYZ3	1		K.GDGARPTTHC*DEVLR.L	Q6NXR4	1.29		K.FFIGQFSDDRHC*SR.F	P52701	1.37
-.MLPDC*LSAEGELR.C	Q8WV74	1		R.LHPC*VMASLR.A	Q6NUM9	1.29		R.IENLELMSQHGC*NAWK.V	O75934	1.37
K.KNEPPLTC*PYSLK.A	Q9UGP8	1		R.ALC*DVGTAISCSR.V	E9PLN8	1.29		R.YVENPSQVLNC*ER.R	O75694	1.37
K.QATEGPC*K.L	Q5T8D3	1		R.ALC*DVGTAISCSR.V	Q9BQB6	1.29		R.YYYDGDMIC*K.V	Q06546	1.37
R.QLC*QESFSSSALGLK.K	Q9P000	1		R.SHAVAC*VNQFIISR.T	Q92973	1.29		K.LFDDLKC*DAERENFHR.L	Q9H3U1	1.37
K.SEC*LNNIGDSSPLIR.A	Q92973	1		R.DGDPLPSSLSC*K.V	P53602	1.29		R.GC*ALQC*AILSPAFK.V	O95757	1.37
R.SMVC*TQK.S	Q92878	1		K.SAC*EQFIQQQTK.L	Q96JB2	1.29		R.GC*ALQC*AILSPAFK.V	P34932	1.37
K.SVLC*STPTINIPASPFMQK.L	Q96KB5	1		R.RAAC*DLVR.G	P55060	1.29		R.GC*ALQC*AILSPAFK.V	Q92598	1.37
R.VLGMELAGGVPLDQC*QGLSQDLR.N	Q96D53	1		K.AQISC*AK.D	Q9NX70	1.29		R.RGPC*IIYNEDNGIIK.A	P36578	1.37
R.YC*VLASLDER.F	P42345	1		K.ITLNDLIPAFQNLLKDC*EAEVR.A	P30154	1.29		K.NMITQYWPDRETAPGDISPYTIPEEDRHC*IR.E	O95373	1.37
K.VEPC*SLTPGYTK.L	Q96EB1	1		R.EANDALNAYVC*K.G	Q68E01	1.29		R.LPLMEC*VQVTK.D	P08237	1.37
R.GIKDSIWGIC*TISK.L	O14681	0.99		R.FAAAPHIC*SDLK.F	Q96RD7	1.29		K.LTAVC*MECFR.E	P04183	1.37
R.VC*ENIPIVLCGNK.V	P62826	0.99		R.LDEDLAAYC*R.R	P09543	1.29		R.LVQAFQYTDEHGEVC*PAGWKPGSDTIKPNVDDSKEYFSK.H	P32119	1.37
R.LMNSKGEYQGVFHC*AVETAK.L	B4DLN1	0.99		R.IIKPC*NHVLSLSFPIRR.D	P00367	1.29		K.NQC*TQVVQER.E	P15924	1.37
R.LMNSKGEYQGVFHC*AVETAK.L	Q9UBX3	0.99		R.IIKPC*NHVLSLSFPIRR.D	P49448	1.29		K.QLC*EDWEVVPEPVAR.W	P27707	1.37
K.GELLGC*FGLTEPNSGSDPSSMETR.A	Q92947	0.99		K.KLEESKQWEC*LTSECR.V	Q5VYK3	1.29		R.TSALC*ADSYNASLAAYHPWVVR.R	Q5TA50	1.37
R.VSNEEKLNLC*R.K	Q9NZ42	0.99		R.YSQIC*AK.A	P56381	1.29		R.ALLVHDLQKLDALEWESC*FNK.V	Q92538	1.37
K.SKDAAFQNVLTHVC*LD.-	Q8NBU5	0.99		R.YSQIC*AK.A	Q5VTU8	1.29		K.VAASC*GAIQYIPTELDQVRK.W	Q7L2H7	1.36
R.LLQDYPITDVC*QILQK.A	Q9NVG8	0.99		K.VLSECSPLMNDIFNKEC*R.Q	P53618	1.29		K.MPAC*NIMLLGAQR.K	Q8WWY3	1.36
R.LHMTIFSQSVSPC*GK.F	Q86W42	0.99		K.DNQNFCVPC*YEK.Q	Q14192	1.28		R.QMEKDETVSDC*SPHIANIGR.L	P47756	1.36
R.ALC*KYEECQK.Q	Q15527	0.99		K.TFMC*TGRPGWLTVSLR.V	Q15392	1.28		K.YGIIC*MEDLIHEIYTVGK.R	P18124	1.36
R.AMELC*LALLLHK.G	Q9NY26	0.99		R.LGIVWQDVLPVNIYC*K.A	O43264	1.28		R.QYYAYLTDTQC*K.R	P48651	1.36
R.AQSPIPNLYLTGQDIFTC*GLVGALQGALLCSSAILKR.N	Q6NUM9	0.99		R.KFQYGNYC*K.Y	Q7L2J0	1.28		R.SWLADVAEKDPDEDC*R.T	Q9Y4R8	1.36
K.C*DSAFDIK.C	Q8N999	0.99		K.KLNCQVIGASVDSHFC*HLAWVNTPK.K	Q06830	1.28		R.NALANPLYC*PDYR.I	P22695	1.36
K.C*EKPFLGHR.H	P48059	0.99		R.ADC*LMGEFK.I	Q9NZM1	1.28		R.VTELNPDKNC*IHTDDDEKISYR.Y	Q9Y6N5	1.36
K.EGNDKDFTLNDFGFMIFHSPYC*K.L	Q01581	0.99		R.AEDQTESSC*ESHR.K	Q9BU76	1.28		R.AALETDENLLLC*APTGAGK.T	O75643	1.36
R.SRDIFDC*LEGAAR.R	Q9Y5U2	0.99		R.AEDQTESSC*ESHRK.S	Q9BU76	1.28		K.AC*PHVWFER.S	Q53EU6	1.36
K.SKEEAC*K.A	P22102	0.99		K.AFGELC*PNTAPLPQLVTEALQTGTTEWFHLK.Q	Q70J99	1.28		K.AC*PHVWFER.S	Q86UL3	1.36
R.FMC*SQLPNQVLK.S	Q9H223	0.99		R.AIQTVSCLLQGPC*DAGNR.A	Q9H3U1	1.28		K.AVCGQC*ER.A	O15304	1.36
K.GMTSLQC*DC*TEK.L	Q9BTE7	0.99		K.AYSFAMGC*WPK.N	O43414	1.28		K.C*IVQVIR.K	Q6ZRQ5	1.36
R.GKIC*FIPR.Y	H3BQ75	0.99		K.RC*NHHQTTK.I	Q5SNT2	1.28		K.FC*DNSSAIQGK.E	O15067	1.36
R.GKIC*FIPR.Y	P49914	0.99		K.YRDVAEC*GPQQELDLNSPR.N	Q9BTE3	1.28		R.GAGSSSGC*GGPK.G	Q9BX10	1.36
R.LAPHC*SFAR.W	Q9NX61	0.99		K.FLGMHPC*ER.S	Q9Y678	1.28		R.GLDFLHANC*IVHR.D	P11802	1.36
R.LC*LYDMIQSR.V	Q86WV5	0.99		K.IC*VNGDDAHPLWK.W	P36969	1.28		K.IGIVGFC*WGGTAVHHLMMK.Y	Q96DG6	1.36
R.LC*SSEVGLLK.N	Q9NWC5	0.99		R.IESYSC*K.M	Q9H063	1.28		K.MPSLQPVVMC*VMK.H	Q8WX92	1.36
K.MPSLQPVVMC*VMK.H	Q8WX92	0.99		R.LTC*LFQIK.R	Q15386	1.28		R.NC*SSFLIK.R	P46779	1.36
K.QQC*EFAK.Q	Q9NVZ3	0.99		R.KMNTIQC*R.A	Q7Z4Q2	1.28		R.SC*SNAAFALK.Q	Q68CP9	1.36
R.SC*ENLAPFNTALK.L	Q13155	0.99		K.NQC*LFTNTQCK.V	Q9UL40	1.28		R.SLYTYC*PETEEINKLTGIGPK.S	Q08AD1	1.36
K.SIDLPIQSSLC*R.Q	O95757	0.99		R.QNPAQFC*VR.V	Q8NC44	1.28		K.RDDKC*DR.K	Q15424	1.35
R.VQDLFC*SVGLNVNNPHFLIMQGR.I	O95347	0.99		R.SAC*DTVDTWLDDTAK.G	Q14204	1.28		R.VQPQWSPPAGTQPC*R.L	P49589	1.35
K.C*ELENCQPFVVETLHGK.I	Q06203	0.99		K.SALC*NADSPKDPVLPMK.F	Q29RF7	1.28		K.IIDINYYPVPEAC*LSNKR.H	P23921	1.35
K.LTGIKHELQANC*YEEVK.D	P23528	0.99		K.SASLDNGGC*ALTTFSVLEGEK.N	P35610	1.28		R.VVAAAFQSEDPADPC*ALLQR.R	Q8N8A6	1.35
R.SLPPVMAQNLSIPLAFAC*LLHLANEK.N	Q15003	0.98		K.SLDDSQC*GITYK.M	Q9NVG8	1.28		K.VDENFDC*VEADDVEGK.I	O14929	1.35
R.AYLEGTC*VEWLR.R	P01891	0.98		K.VSLTPDFSAC*R.A	Q8N0V3	1.27		R.ALAQEWGC*PFMETSAK.S	Q9Y3L5	1.35
R.AYLEGTC*VEWLR.R	P01892	0.98		R.TGLC*YLPEELAALQK.L	Q13045	1.27		K.GYGC*AGVSSVAYGLLAR.E	Q92947	1.35
R.AYLEGTC*VEWLR.R	P30453	0.98		R.TILVYSRPPC*QPQFSLTEPMKK.M	Q9NWV8	1.27		K.AGEGTYALDSESC*MEK.L	O00541	1.35
R.AYLEGTC*VEWLR.R	P30466	0.98		K.WEALHAAECPC*GPSLIR.F	P53701	1.27		R.C*HWSDMFTGR.L	P46060	1.35
R.AYLEGTC*VEWLR.R	P30479	0.98		R.SILSPGGSC*GPIK.V	P78347	1.27		R.FHC*DPTFWAK.N	Q9UPN9	1.35
R.LEETKDGSC*VSMPPYFR.F	Q05932	0.98		R.AC*AEALR.S	O60232	1.27		K.FTNTQITEHYSTC*IK.L	Q15003	1.35
R.VITVDGNIC*TGK.G	O95299	0.98		K.AC*PHVWFER.S	Q86UL3	1.27		R.GVAVLC*TE.-	Q14204	1.35
R.AAC*GAVLLTELLER.A	Q8N697	0.98		K.ADTSQEIC*SPR.L	P52948	1.27		R.IALYCHQLNIC*SK.V	P35221	1.35
K.VLSECSPLMNDIFNKEC*R.Q	P53618	0.98		K.AGTDPSHMPTGPQAASC*LDLNLVTR.V	Q9BQG0	1.27		R.IIC*SAGLSLLAEER.Q	Q9BV86	1.35
K.GITPC*KPIDIK.C	O15228	0.98		R.C*AAGVMHLFYVR.A	Q9NYA1	1.27		R.LFAC*MNPATDVGKR.N	Q9NU22	1.35
K.VALEGLRPTIPPGISPHVC*K.L	Q13418	0.98		R.ELLELSCC*HSC*PFSSTAAAK.C	Q96T76	1.27		K.LHEQLTESEQAAQC*YIK.Y	Q9UJX2	1.35
K.KIEQC*DYPPLPSDHYSEELR.Q	Q8TDX7	0.98		K.EADQKEQFSQGSPSNC*LETSLAEIFPLGK.N	Q9NQ88	1.27		R.LIGNLC*YK.N	Q9UBB4	1.35
R.SHC*FTQAMLSQPR.M	Q9UBM1	0.98		K.FIDPFC*K.I	Q14684	1.27		R.GKRPLSEC*QEGK.V	Q9H0K6	1.35
R.RLC*LQSIAFISR.L	P57088	0.98		K.GALEGSSC*PFR.T	P30519	1.27		K.YMLDC*R.T	Q9Y277	1.35
R.VRNC*SSPEFSK.T	Q99829	0.98		R.IPSNILLPEDKC*K.E	Q9H081	1.27		K.NC*PHVVVGTPGR.I	O00148	1.35
R.AVASQLDC*NFLK.V	P62333	0.98		K.LDSLQTLNAC*C*AVYGQK.E	Q96T76	1.27		K.TAVC*DIPPRGLK.M	Q3ZCM7	1.35
R.GTCSRPDTEC*K.F	Q9NR56	0.98		R.LLEGDGGPNTGGMGAYC*PAPQVSNDLLLK.I	P22102	1.27		R.AIVDCGFEHPSEVQHEC*IPQAILGMDVLCQAK.S	O00148	1.34
K.ADMTC*R.G	O14929	0.98		R.MC*FVDPVR.Q	Q9BQ24	1.27		R.AIVDCGFEHPSEVQHEC*IPQAILGMDVLCQAK.S	Q13838	1.34
K.ATC*KDLVMFI.-	P54819	0.98		R.QAEEEC*AHR.G	Q9H147	1.27		K.TVFAEHISDEC*KRR.F	P39023	1.34
R.CAC*AQGWTGPR.C	Q9UM47	0.98		K.QC*VIDDR.A	P62070	1.27		K.VFANPEDC*VAFGK.G	P10620	1.34
R.C*AGDWLPR.G	Q9H553	0.98		K.SWNTEAGVPLATLC*SNLYHR.E	Q08AF3	1.27		K.HPLTQELKEC*EGIVPVPLAEK.L	P82932	1.34
K.C*SSAFQNLLPFYSPVVEDFIK.I	Q96ER3	0.98		R.TSSC*PVIFILDEFDLFAHHK.N	O43929	1.27		R.YLEC*SALQQDGVK.E	P84095	1.34
R.KKDDDTSTC*K.T	Q96QE3	0.98		K.VC*EDLDTSVNLAWTSGTNC*TR.F	P45880	1.27		K.GELLGC*FGLTEPNSGSDPSSMETR.A	Q92947	1.34
K.FC*DNSSAIQGK.E	O15067	0.98		K.VVTNC*QER.I	O94763	1.27		K.KGKPHC*SR.N	Q02878	1.34
R.GGC*FTYTMSR.I	E7ENX8	0.98		R.VYSASQWDC*PLGLIPHPHR.H	Q92466	1.27		R.NPLFC*GAENTSLWELKK.L	Q03701	1.34
R.GGC*FTYTMSR.I	Q03519	0.98		R.YYYDGDMIC*K.V	Q06546	1.27		R.AC*DLPAWVHFPDTERAEWLNK.T	A0FGR8	1.34
R.GLQPEC*C*AVFR.L	P04049	0.98		R.QYYAYLTDTQC*KR.V	P48651	1.27		R.KC*SAAALDVLANVYRDELLPHILPLLK.E	Q92973	1.34
K.IQSC*NSGVK.S	Q92576	0.98		R.LKNC*GC*LGASPNLEQLQEENLK.L	P54136	1.27		R.GVNEDTYSGILDC*ARK.I	Q9H936	1.34
K.LNQENEHIYNLWC*SGR.V	Q96A33	0.98		R.GRLQLEAC*GMR.R	Q9H4A6	1.26		K.MELLMSALSPC*LL.-	Q9NVC6	1.34
R.NHLLPDIVTC*VQSSR.K	Q9BSD7	0.98		K.TLVQQLYTTLC*IEQHQLNKER.E	Q8NE86	1.26		R.YGDGGSSFQSTTGHC*VHMR.G	P55795	1.34
R.EFVRQDDC*MVLK.E	O95466	0.98		K.MVLSRPC*HPDDQFTTSILR.H	Q68E01	1.26		R.AAC*CLAGAR.A	O95336	1.34
K.SC*AFAMGHLVR.T	Q5VYK3	0.98		-.MKLNISFPATGC*QK.L	P62753	1.26		R.ALDC*SSSIRQPSLHMSAAAASR.D	O94776	1.34
R.SLC*SDDTPMVR.R	P30154	0.98		K.AVQDLC*GWR.I	Q9P258	1.26		K.C*LEWLIHR.F	Q9H583	1.34
K.TLESQNLFC*C*LYR.S	Q08AM6	0.98		K.TSSDPTC*VEK.E	O14980	1.26		R.C*SEGSFLLTTFPRPVTVEPMDQLDDEEGLPEKLVIK.N	Q15233	1.34
K.VLNC*DTISQVK.E	O15031	0.98		R.GLMAIDC*PHTGIVDYR.Q	Q9H9P8	1.26		R.ERDEENQEMSSC*K.S	O60934	1.34
K.TSSDPTC*VEK.E	O14980	0.98		K.LGEWVGLC*K.I	P25398	1.26		R.LREFVFC*NK.T	Q9NZE8	1.34
R.RSHHPESGC*R.T	Q5TA50	0.98		K.C*AMTALSSK.L	Q99832	1.26		K.GALMANFLTQGQVC*C*NGTR.V	P49189	1.34
K.AHQC*GDDDKTRPLVK.-	Q9BQ61	0.97		K.C*LQNPSSDIR.L	Q92616	1.26		R.GTIC*NPGPR.K	Q8NCG7	1.34
K.LTGMAFRVPTANVSVVDLTC*R.L	P04406	0.97		R.DC*PIFYMR.K	P28340	1.26		K.LQENPESC*LSIVR.E	Q15361	1.34
K.ANKEILDEAYVMASVDNPHVC*R.L	P00533	0.97		K.EVVPLPQQVLC*LK.G	Q15751	1.26		K.LTMPSPMPEYLNVHYIC*ESASR.L	P49116	1.34
R.AFFPC*FDTPAVK.Y	Q9H4A4	0.97		R.LVQAFQYTDEHGEVC*PAGWKPGSDTIKPNVDDSKEYFSK.H	P32119	1.26		K.VRPSTGNSASTPQSQC*LPSEIEVK.Y	Q9UJX3	1.34
R.ENMAYTVEC*LR.G	P22695	0.97		R.MIVSSTSANC*SHQVK.Q	Q8IWA4	1.26		K.SLC*PETWPTWAGRPQDGVAVLVR.H	O00159	1.34
K.GADINAPDKHHITPLLSAVYEGHVSC*VK.L	P58546	0.97		R.MLVSC*IDFR.Y	Q7L5Y1	1.26		R.SWDVDPGVC*NLDEQLK.V	Q66K74	1.34
R.SAQGC*DLLQNLQNITQGAK.I	Q9UK39	0.97		K.KKTEDEHFEFHSRPC*PTK.I	Q9ULW0	1.26		K.TMQFEPSTMVYDAC*R.I	Q9Y490	1.34
R.GVNEDTYSGILDC*AR.K	Q9H936	0.97		R.GLKPSC*TIIPLMK.K	P49327	1.26		K.VVTSEALC*GVPVLVLANK.Q	Q13795	1.34
K.GIFGFTDSDC*IGK.I	P23381	0.97		K.QEC*LNNIGDASSLIR.A	O14787	1.26		R.FC*IWTESAFR.K	P36578	1.34
R.KC*STPEEIKK.R	P60981	0.97		K.SVGGAC*VLVA.-	P46776	1.26		R.LIGPNC*PGVINPGECK.I	P53597	1.34
R.HGGPQYC*R.S	O14684	0.97		R.TC*QEQR.L	Q3MHD2	1.26		K.YMAC*CLLYRGDVVPK.D	P68366	1.34
R.AC*INTLQFLYSR.G	Q8WVB6	0.97		R.TLFQACTDEEAAVVQSC*TR.S	Q86Y56	1.26		K.YMAC*CLLYRGDVVPK.D	Q71U36	1.34
K.C*LPPPSIR.V	O15269	0.97		R.VVSPGPLHC*LK.V	Q96CQ1	1.26		K.GIVDC*IVR.I	P12236	1.34
R.CVGAELGLDC*PGRDYPNICAGTDR.Y	Q16831	0.97		R.NWYVQPSC*ATSGDGLYEGLTWLTSNYKS.-	P62330	1.25		R.KAVVVC*PK.D	Q00839	1.33
K.TLVAGTIWNLKDIIPC*K.S	Q7Z4Q2	0.97		R.AHQLVMEGYNWC*HDR.N	P67775	1.25		K.KGAVEC*CPNCR.G	P31689	1.33
K.SLESTTLTEKEGEIYC*K.G	Q16527	0.97		R.SC*WVLHAFSSLK.F	O15397	1.25		R.YKGLMDC*AK.Q	Q9HC21	1.33
K.GAEPETGSAVSAAQC*QVGPTR.E	Q9UI10	0.97		K.GEETPVIVGSALC*ALEGRDPELGLK.S	P49411	1.25		R.VLKEVEAVIPDHC*IFASNTSALPISEIAAVSK.R	P40939	1.33
R.IDC*FLPHLRDELFK.Q	Q92538	0.97		R.QVC*QLPGLFSYAQHIASIDGR.R	Q9Y6C9	1.25		R.AEFGSLGPLLC*SQVVK.A	P49848	1.33
K.LHYGDLTDSTC*LVK.I	O60547	0.97		R.QLC*DNAGFDATNILNK.L	Q99832	1.25		R.NQSFC*PTVNLDK.L	P46776	1.33
R.LILADALC*YAHTFNPK.V	P28838	0.97		R.AC*LAEAITLVESTHSR.K	Q8IVH4	1.25		R.VNQPDREC*K.H	Q14692	1.33
K.LSQSPDSNLC*DK.A	Q8IUR7	0.97		R.C*LADAVVK.I	Q5TGZ0	1.25		R.LIPDGC*GVK.Y	P27635	1.33
K.LTTC*C*R.R	P11717	0.97		K.C*QVTPR.R	Q16666	1.25		K.SEC*LNNIGDSSPLIR.A	Q92973	1.33
K.DPSKNDTC*K.S	O43169	0.97		K.EDSQSC*R.V	Q96T76	1.25		K.LHYCVSC*AIHSK.V	F8VZW7	1.33
R.NQC*EGIKK.Y	O14980	0.97		K.LSSQEESIGTLLDAIIC*R.M	Q9Y3C4	1.25		K.AFLDNPGILSELC*GTLSR.L	Q6NXE6	1.33
R.SAC*DTVDTWLDDTAK.G	Q14204	0.97		R.FCEKNC*EK.S	Q9P287	1.25		K.C*HTPPLYR.M	Q02543	1.33
R.SFSDIC*GGR.L	Q14442	0.97		R.SPLLFTLAENC*IDQVMK.L	Q6P3X3	1.25		K.FHRDYVPC*K.I	O95625	1.33
K.TNC*ILFCGR.F	P50452	0.97		K.VACC*PLER.C	Q15021	1.25		R.ESQLALIVC*PLEQLLQGINPR.T	Q92621	1.33
R.VLIHWMTLC*QTQMK.L	Q8IUX1	0.97		K.VCLEFQDC*GVGLNAAQFK.Q	O95059	1.25		R.EVC*LASER.S	P52701	1.33
K.YVSVC*EGPLKEQEWNTTNAK.Q	A6NDU8	0.97		K.YVQEDSC*QHGVYGR.L	Q9C0I1	1.25		R.FAC*STVVR.A	Q9UNS1	1.33
R.YYAC*EALYNIVK.V	Q08AM6	0.97		K.AC*TTEAHKQR.M	Q16514	1.25		R.INPYMSSPC*HIEMILTEKEQIVPKPEEEVAQK.K	J3QL51	1.33
K.KGVC*DQSFGIHVAELANFPK.H	P43246	0.97		K.QPTSEANC*SAMFGK.L	Q29RF7	1.25		R.INPYMSSPC*HIEMILTEKEQIVPKPEEEVAQK.K	P18621	1.33
K.KNC*PHVVVGTPGR.I	O00148	0.96		R.RASC*TSSTSGSK.R	P13807	1.25		R.LLTLEQPQGDSMMTC*EQAQLLANLAR.L	Q86VU5	1.33
K.AVELLGDIVQNC*SLEDSQIEKER.D	P31930	0.96		K.ATC*IGNNSAAAVSMLKQDYK.E	P25789	1.24		R.NEDAC*R.Y	O43760	1.33
K.AFC*ADQLDVFLQK.E	Q9P2N5	0.96		K.LHYC*VSCAIHSK.V	F8VZW7	1.24		K.SC*AFAMGHLVR.T	Q5VYK3	1.33
R.FHADSVC*K.A	Q9BW61	0.96		R.EIVHIQAGQC*GNQIGTK.F	Q9BUF5	1.24		R.SGC*EER.W	O60427	1.33
K.AVQDLC*GWR.I	Q9P258	0.96		K.GLNDLQPWPNQMAIAC*GSR.A	Q9Y673	1.24		K.TIQTISLLAHLAC*EK.G	Q6ZRS2	1.33
R.EPSQVIFC*NR.S	P40337	0.96		K.VQEYHIMSSC*YQR.L	Q9BXW9	1.24		R.VAAPGSTGATFLAVC*R.G	F6WH68	1.33
R.QASLADC*LNHAVGFASR.T	O43592	0.96		K.VC*EDLDTSVNLAWTSGTNCTR.F	P45880	1.24		R.VC*EIQATLR.E	Q9BTA9	1.33
R.LGYVCPQEVAPMLQQFIRPWC*TSLR.N	O14787	0.96		R.VEAEGLAALHSLTAC*LSR.S	Q96T76	1.24		K.VNNSC*QK.-	Q8NFW8	1.33
R.LGYVCPQEVAPMLQQFIRPWC*TSLR.N	Q92973	0.96		K.MTNHC*VFSANEDHETIR.N	Q9Y6E2	1.24		R.DKVQC*ILR.M	Q14C86	1.33
K.IKADPDGPEAQAEAC*SGER.T	Q9NX24	0.96		R.AALYLEC*SAK.F	Q9HBH0	1.24		R.RVSSGSC*FALE.-	Q9NZJ7	1.33
R.GLDFLHANC*IVHR.D	P11802	0.96		K.ASC*TDGR.L	Q9H8M1	1.24		R.RYC*HDLGER.A	Q9BQG0	1.33
K.AQLVEIVGC*HFR.S	O75446	0.96		R.ACREC*PR.G	Q5VZV4	1.24		K.NC*GCLGASPNLEQLQEENLK.L	P54136	1.33
R.AVC*MLSNTTAIAEAWAR.L	P68366	0.96		K.FAGMPITLTVSTSSLNLMAADC*K.Q	P29353	1.24		K.NCGC*LGASPNLEQLQEENLK.L	P54136	1.33
R.AVC*MLSNTTAIAEAWAR.L	Q71U36	0.96		K.FTVAESC*DR.I	Q04726	1.24		R.SC*FEDPEWK.Q	Q9BQG0	1.33
R.KC*STPEEIK.K	P60981	0.96		K.GMTSLQC*DC*TEK.L	Q9BTE7	1.24		K.IHMGSC*AENTAK.K	P24752	1.32
K.C*SWLVVQCLQR.A	P14324	0.96		K.LASGC*DGSEIPDEVK.L	Q9UEW8	1.24		K.TYC*CDLK.M	Q9Y6C9	1.32
K.CSWLVVQC*LQR.A	P14324	0.96		K.LNCQVIGASVDSHFC*HLAWVNTPKK.Q	Q06830	1.24		R.TVDLGLTGNHGVVHPSLADSANKFEENTYC*FGR.T	Q9H845	1.32
K.QDVKEC*MTVAEISQFLK.L	Q9Y689	0.96		R.EKPHACC*ECGK.T	Q8N0Y2	1.24		K.TATAVAHC*KR.G	P62249	1.32
R.GLNQDC*C*VVYR.L	P10398	0.96		R.LLMKPQWHDLLPC*K.L	Q96KC8	1.24		R.GHVLSLALQMYGC*R.V	Q14671	1.32
K.IVAISC*AADILK.A	Q5VYK3	0.96		R.QIPYTMMKFAC*FERTVEALYKFVVPKPR.S	Q00325	1.23		K.VC*DEPHPLLVK.E	P35250	1.32
K.MDSC*IEAFGTTK.Q	Q9GZS1	0.96		R.DSGAALGLGIALHSPC*YAQVR.R	Q9BUM1	1.23		K.LNQVC*FDDDGTSSPQDR.L	Q8N1F7	1.32
K.QGFGNLPIC*MAK.T	P11586	0.96		K.GLDYEGGGC*R.F	O60568	1.23		R.AHGC*FPEGR.S	Q7Z5L9	1.32
R.SVSC*DNVSK.V	Q96CB8	0.96		R.INPYMSSPC*HIEMILTEKEQIVPKPEEEVAQKK.K	J3QL51	1.23		R.DSSLFDIFTLSC*NLLK.Q	Q9UIA9	1.32
R.TC*LSQLLDIMK.S	P51946	0.96		R.INPYMSSPC*HIEMILTEKEQIVPKPEEEVAQKK.K	P18621	1.23		R.TKPQGDQDTGKEADDGC*ALGGR.-	G3V325	1.32
R.TPC*PNSK.I	O14981	0.96		R.QMEKDETVSDC*SPHIANIGR.L	P47756	1.23		R.ELQIC*PATAGSGPAATQDFSK.L	P00519	1.32
K.TTIIEC*LK.Y	Q92878	0.96		K.C*ILVASPGFVR.E	Q9BRX2	1.23		R.FMC*AQLPNQVLESISIIDTPGILSGAK.Q	Q9NZN4	1.32
K.VAC*AEEWQESR.T	O75663	0.96		K.C*MQEIPQEQIKEIK.K	Q8NB16	1.23		R.GNEVC*R.K	O95081	1.32
R.VPC*NTVFGSQHQMDVAFLEK.L	Q6P996	0.96		K.C*QIIYPR.Q	Q15645	1.23		R.IWVDSPHC*K.T	Q8N201	1.32
K.ANFIEADKYFLPFELAC*QSK.S	Q9Y6D5	0.96		R.LEETKDGSC*VSMPPYFR.F	Q05932	1.23		K.LAEAHPDC*LMLNFTVK.L	Q8IXH7	1.32
R.YYYDGDMIC*K.V	Q06546	0.96		K.GTC*VEGTIPK.L	Q93009	1.23		K.KLDGIPDC*DISPVQIR.K	Q9H081	1.32
R.QSC*YLC*DLPR.M	Q7Z5L9	0.95		R.RAPLRPEVPEIQEC*PIAQESLESQEQR.A	Q9H840	1.23		R.MC*LDQYSMLPATPWGVWEIIKR.T	P13995	1.32
R.QSC*YLC*DLPR.M	Q9H1B7	0.95		K.QFLDFGSVNAC*EK.T	Q15118	1.23		R.GRDLEQILSQYITFVKPAFEEFC*LPTKK.Y	Q9BZX2	1.32
K.FLSQIESDC*LALLQVR.A	P52789	0.95		R.VAAPGSTGATFLAVC*R.G	F6WH68	1.23		K.GRPYSVPPC*VEEALGQKR.K	Q6IBW4	1.32
K.KGAVEC*CPNCR.G	P31689	0.95		R.C*DAGGPR.Q	Q9NXG2	1.22		R.SVLGGDC*LLK.F	P41240	1.32
R.DSSLFDIFTLSC*NLLK.Q	Q9UIA9	0.95		R.LALFNPDVC*WDRNNPEPWNK.L	O00483	1.22		K.TYC*C*DLK.M	Q9Y6C9	1.32
K.AGVVIHC*NHR.I	Q9H8P0	0.95		K.NVGTGLVGAPAC*GDVMK.L	Q9H1K1	1.22		R.VACALTLPFIC*R.K	Q96C12	1.32
R.SGETEDTFIADLVVGLC*TGQIK.T	P06733	0.95		K.FFTVEPQHIPC*VLMAFLDHR.G	O43592	1.22		K.VEDMAELTC*LNEASVLHNLK.E	P35579	1.32
R.AC*ALQVLSAILEGSK.Q	Q6AI08	0.95		R.SLLINAVEASC*IR.T	J3KR12	1.22		K.VLC*ELADLQDKEVGDGTTSVVIIAAELLK.N	P17987	1.32
R.IENLELMSQHGC*NAWK.V	O75934	0.95		R.SLLINAVEASC*IR.T	P32322	1.22		K.VLTGVAGEDAEC*HAAK.L	O95373	1.32
K.LFC*LTLHR.Y	Q92616	0.95		R.SLLINAVEASC*IR.T	Q96C36	1.22		R.YLGDLTPLQESC*LIR.L	Q92503	1.32
K.EKAENC*VK.L	Q96GA3	0.95		K.KLGNNC*VFAPADVTSEKDVQTALALAK.G	Q99714	1.22		K.YTGTLDC*AKK.L	O43772	1.32
R.AIIQEVC*FMK.K	O14976	0.95		R.VEANLHGLTLYDTAPC*PINNER.T	Q6UX65	1.22		K.MLSC*AGADR.L	P27635	1.31
R.APEILLGC*K.Y	P24941	0.95		K.AIAC*VVTAC*SAELEK.S	Q5VYK3	1.22		K.VRSEEAPAGC*GAEGGGPGSGPFADLAPGAVHMR.V	Q9BUL9	1.31
R.AVC*EADQSHGGPR.S	O14545	0.95		R.ASVGC*GSEAAR.Y	Q63HN8	1.22		R.RQSC*YLC*DLPR.M	Q7Z5L9	1.31
R.C*DTVVSEISTGQR.T	Q5T160	0.95		K.C*LVPEVTFR.A	Q96F86	1.22		R.RQSC*YLC*DLPR.M	Q9H1B7	1.31
K.KC*PTEYQEK.M	Q68DH5	0.95		R.ILEGSGATEFHC*SAR.S	Q9NTM9	1.22		K.DNQNFC*VPCYEK.Q	Q14192	1.31
R.C*VFEMPNENDKLNDMEPSK.A	Q9P0L0	0.95		R.LECVEPNC*R.S	H7BZ11	1.22		R.TAIC*NLILGNPPSK.V	Q9NRX1	1.31
K.C*VLSGPPQLEK.Y	Q9BQ52	0.95		R.LECVEPNC*R.S	Q969Q0	1.22		K.IKADPDGPEAQAEAC*SGER.T	Q9NX24	1.31
R.EAADDC*AK.A	Q92616	0.95		K.LFLDLAC*R.L	Q15771	1.22		R.VRPC*VVYGGADIGQQIR.D	O00571	1.31
R.KFLMEC*R.N	Q13541	0.95		K.LGC*QDAFPEVYDK.I	Q15392	1.22		K.VLSFTHPTSFHSAETYESLLQC*LR.M	Q29RF7	1.31
R.GDC*LAFQMR.A	Q66PJ3	0.95		K.MPSLQPVVMC*VMK.H	Q8WX92	1.22		R.AENGLLMTPC*YTANFVAPEVLKR.Q	Q15418	1.31
R.GVLLHGPPGC*GK.T	O15381	0.95		R.VLGRPITAHLC*TAK.S	Q9UHQ1	1.22		R.DSGAALGLGIALHSPC*YAQVR.R	Q9BUM1	1.31
K.GWNEC*EQTVALLSLLK.R	Q5PRF9	0.95		K.QAFTDVATGSLGQGLGAAC*GMAYTGK.Y	P29401	1.22		K.ELYTLDGTVGIEC*PDYR.G	Q7L8L6	1.31
K.GWNEC*EQTVALLSLLK.R	Q9UPU9	0.95		R.RQDSDLVQC*GVTSPSSAEATGK.L	Q9HC52	1.22		K.RLIPDGC*GVK.Y	P27635	1.31
R.HGELWC*AVSK.D	O94906	0.95		K.QVEEQSAAANEEVLFPFC*R.E	Q5SW79	1.22		R.LKAAC*NLLQR.G	Q01813	1.31
K.IAAYLQSDQFC*K.M	P21266	0.95		R.SAQGC*DLLQNLQNITQGAK.I	Q9UK39	1.22		R.C*SLLDPFAAVR.R	Q86Y56	1.31
R.IFTHHLC*R.A	Q9BQG0	0.95		K.SC*GLHVTSIK.I	P17812	1.22		R.FAAAPHIC*SDLK.F	Q96RD7	1.31
R.SVSTLKPC*AK.D	Q7Z3U7	0.95		R.VGSDMTSQQEFTSC*LK.E	P40855	1.22		R.TYKGSLDC*LAQIYGHEGLR.G	Q8N8R3	1.31
R.GVQDIVVGEGTHFLIPWVQKPIIFDC*R.S	P35232	0.95		R.VITVDGNIC*TGK.G	O95299	1.22		K.ISGPNPLSC*LK.K	Q9BRU9	1.31
R.RKPLFC*GNSEADQLGK.I	P11802	0.95		K.VLNC*DTISQVK.E	O15031	1.22		R.NALANQSDC*VLHR.I	Q9UJX3	1.31
K.AKPPADPAAAASPC*R.A	Q9GZT9	0.95		K.YFSLPFC*VGSK.K	Q9HD45	1.22		K.EIEPFLPPLKPDYC*VK.Q	Q8IZV5	1.31
K.QSLLFC*PK.S	Q56VL3	0.95		R.QDPGTDRTEDSGLAAGPPEAAGENFAPC*SVAPGK.S	Q96CP2	1.22		K.VALEGLRPTIPPGISPHVC*K.L	Q13418	1.31
K.SAGGIGVAVSC*IR.A	P23921	0.95		R.VC*ENIPIVLCGNK.V	P62826	1.21		K.SIVTAEVSSMPAC*K.F	Q86SZ2	1.31
R.VGSDMTSQQEFTSC*LK.E	P40855	0.95		R.AC*WVLHYFCEVK.F	O95373	1.21		R.TIAALLPC*LLDK.G	Q5VYK3	1.31
R.RVSSGSC*FALE.-	Q9NZJ7	0.95		K.KIADFLNSFDMSC*R.S	Q8WUW1	1.21		K.VAAAASC*LSQK.V	O95067	1.31
R.VVVVDC*K.K	Q3ZCQ8	0.95		R.FLYEC*PWR.R	P11498	1.21		R.WC*DKSDEDDWSKPLPPSER.L	O00571	1.31
K.LNC*QVIGASVDSHFC*HLAWVNTPK.K	Q06830	0.95		R.QMPVHYGC*K.E	F5H5P2	1.21		R.YAIC*SALAASALPALVMSK.G	P36578	1.31
K.ATQC*VPK.E	Q9HAV7	0.95		R.QMPVHYGC*K.E	P12694	1.21		K.RSIQFVDWC*PTGFKVGINYQPPTVVPGGDLAK.V	P68366	1.31
K.GLLSELLHNC*DGQLK.G	P40938	0.95		R.MLGETC*ADCGTILLQDK.Q	O60232	1.21		R.LPSGLGC*STVLSPEGSAQFAAQIFGLSNHLVWSK.L	P22234	1.3
R.VPAPSIEDICHVLSTVC*K.K	P40938	0.95		R.LLDLVVQPVPRPSQC*SEFIQQSSMK.S	Q8WYP5	1.21		R.LC*PPELAPAELLLLLR.T	Q86YV9	1.3
R.AYCHILLGNYC*VAVADAK.K	Q9Y2Z0	0.95		R.KLVEALC*AAGHR.A	P23919	1.21		R.SFGAEEHEVC*R.Y	E7ENX8	1.3
K.LLDC*LQESHSFSK.A	Q9Y6D5	0.94		R.DTQC*GFK.L	Q9Y673	1.21		R.SFGAEEHEVC*R.Y	Q03519	1.3
R.INALTAASEAAC*LIVSVDETIKNPR.S	Q99832	0.94		K.C*HTPPLYR.M	Q02543	1.21		R.AHGDTQHC*R.K	Q15020	1.3
R.KENQWC*EEK.-	P63208	0.94		R.ALVGLC*K.L	Q9H3U1	1.21		K.TYDPSGDSTLPTC*SK.K	Q9Y2X3	1.3
R.YYEKPC*R.R	P82921	0.94		K.CEEC*GLLLSSEGEC*QGCYPLDGHILCK.A	Q15654	1.21		K.YGIIC*MEDLIHEIYTVGKR.F	P18124	1.3
R.IVQTLC*TVR.G	Q96D53	0.94		R.DAPAPAASQPSGC*GK.H	Q96I15	1.21		R.GNPVPILIPC*HR.V	P16455	1.3
K.VAC*ITEQVLTLVNKR.I	P04843	0.94		K.EGTDSSQGIPQLVSNISAC*QVIAEAVR.T	Q99832	1.21		R.TGC*IGAK.H	P62913	1.3
K.NAC*DHLSGFNVC*NR.Y	Q9Y3B4	0.94		R.FMQNNC*VPKK.M	P14635	1.21		K.FSIQTMC*PIEGEGNIAR.F	Q13155	1.3
R.NLNDQVLFIDQGNRPLFEDMTDSDC*RDNAPR.T	Q14116	0.94		R.IFNLNC*WGIPYLSK.H	O60906	1.21		R.SQVTHYSNLLC*DLLR.G	P56945	1.3
K.ALSAFLTC*GNWK.Q	O95163	0.94		R.LLTC*IEPPQPR.Q	Q5H9R7	1.21		R.GANDFMC*DEMER.S	P17987	1.3
R.LEC*VEPNC*R.S	H7BZ11	0.94		R.QDC*FNMAQGFR.T	Q9Y6K5	1.21		R.IC*PVEFNPNFVAR.M	Q9UI30	1.3
R.LEC*VEPNC*R.S	Q969Q0	0.94		R.TQEQC*VHNETKNELEK.M	O60313	1.21		R.LHMTIFSQSVSPC*GK.F	Q86W42	1.3
R.VTC*ACQEHR.T	Q9BZG1	0.94		K.TSSDPTC*VEKEK.V	O14980	1.21		R.AALYLEC*SAK.F	Q9HBH0	1.3
R.SILSPGGSC*GPIK.V	P78347	0.94		R.VQFC*PFEK.N	Q96EL3	1.21		K.ATNLC*FAER.N	Q92797	1.3
K.EC*ADLWPR.I	P62829	0.94		R.YKVQNNLYHHC*VINK.L	Q12769	1.21		K.C*LQNPSSDIR.L	Q92616	1.3
K.LLTEC*PPMMDTEYTK.L	P55060	0.94		K.RPAC*TLKPECVQQLLVCSQEAK.K	P32320	1.2		K.IAQLFSISPC*QISQIYK.Q	Q12800	1.3
K.AATFFGC*IGIDKFGEILKR.K	P55263	0.94		R.IC*MAIPAMAIPPLIMDTLEK.K	Q9BWM7	1.2		K.SAC*ASTNEEKAK.N	Q9BZ95	1.3
R.AISTIC*SLEK.K	Q9UJX3	0.94		R.ECISIHVGQAGVQIGNAC*WELYCLEHGIQPDGQMPSDK.T	Q71U36	1.2		K.VLSVC*PSNKPAIVEAGGMQALGK.H	P14923	1.3
K.ALVPLGIGIATGEQC*HNR.V	Q7L5Y1	0.94		R.RRAPPGGC*EER.E	Q5RKV6	1.2		R.DC*LIPMGITSENVAER.F	P09110	1.29
R.C*GC*VTMLK.S	Q9Y2X0	0.94		K.C*ELSGQWLAHAIQTVR.L	Q96KP1	1.2		K.GC*GVVK.F	P52272	1.29
K.C*AVVDVPFGGAK.A	P00367	0.94		R.IDC*FLPHLRDELFK.Q	Q92538	1.2		R.GLINLGNTC*FMNCIVQALTHTPLLR.D	Q9UPT9	1.29
K.C*AVVDVPFGGAK.A	P49448	0.94		K.IGLAVC*YDMR.F	Q86X76	1.2		K.AVAC*SGAAQVR.I	Q92797	1.29
R.C*DLCQEVLADIGFVK.N	P48059	0.94		K.C*HPTDER.V	Q16719	1.2		R.AVIHLLLC*QLR.V	O95602	1.29
R.CDLC*QEVLADIGFVK.N	P48059	0.94		K.QC*VDHYNEVK.S	O95299	1.2		K.TATAVAHC*K.R	P62249	1.29
R.C*DPVDYSNSPEALR.M	Q9BW60	0.94		R.VTC*ACQEHR.T	Q9BZG1	1.2		R.VYTSMSDC*LIK.T	Q9H936	1.29
R.C*GLQGHTGR.L	Q92508	0.94		K.NSNVDSSYLESLYQSC*PR.G	Q7Z2W4	1.2		R.KGGSYSQAASSDSAQGSDVSLTAC*KV.-	P01891	1.29
R.C*VNQWQLSGELK.A	Q86W42	0.94		K.DIEDTLSGIQTAGC*GSTFFR.D	Q8IYU8	1.2		R.KGGSYSQAASSDSAQGSDVSLTAC*KV.-	P01892	1.29
K.AKPTGSGKEEGPAPC*K.Q	Q8IUF8	0.94		K.EVLQEC*K.T	Q01658	1.2		R.DLPIKLNQWC*NVVR.W	P07814	1.29
K.EGVEC*EVINMR.T	P11177	0.94		K.IAAYLQSDQFC*K.M	P21266	1.2		K.AIC*GLIDDYSMVR.F	Q9UHW5	1.29
K.ELSC*TELQELK.Q	H3BQ06	0.94		K.IC*ALENELAALR.A	Q15390	1.2		R.ANDQEPC*GWWLAK.V	P51114	1.29
K.ELSC*TELQELK.Q	Q9ULP9	0.94		K.IIC*NLKPALK.L	Q9ULK4	1.2		K.C*GLVLSWK.R	P49756	1.29
K.EMIENC*LDAK.S	P40692	0.94		K.LEC*LVQLVR.A	Q9NXR5	1.2		R.CPVCSQEC*AER.H	O15164	1.29
K.FQEQFLNVSGMPQELNQYPC*LK.H	Q86X10	0.94		R.LMDVC*ATSR.T	P11802	1.2		R.C*RELPAQK.W	P08195	1.29
K.EILGTAQSVGCNVDGRHPHDIIDDINSGAVEC*PAS.-	P30050	0.94		R.LNC*AEYK.N	Q8TB03	1.2		K.C*SAAALDVLANVYRDELLPHILPLLK.E	Q92973	1.29
R.HYAHTDC*PGHADYVK.N	P49411	0.94		R.SGVVC*R.V	Q8N7H5	1.2		R.GVNEDTYSGILDC*AR.K	Q9H936	1.29
R.IIVPFVTC*GDLSSYDSDR.S	Q9UET6	0.94		K.TC*AELVR.E	Q86X76	1.2		R.IGYC*PQFDALLDHMTGR.E	Q99758	1.29
R.MEQC*VEK.T	O00194	0.94		R.VLTSGC*DSSALEGLPLIK.R	Q9NTM9	1.2		R.ILDIVPPTFSALC*PANPTC*IYK.Y	Q09161	1.29
R.NC*SAVLCCR.M	Q9Y2G3	0.94		R.VKYC*NSLPDIPFDPK.F	Q8N7H5	1.2		R.ISELSGC*TPDPR.I	Q9H9P8	1.29
K.TDSPSC*EYSR.F	Q9HAV4	0.94		R.YVLHC*QGTEEEK.I	P62495	1.2		K.ISNQVDLSNVC*AQYR.Q	O75694	1.29
K.TSVVFHQLGTAMPMSVEEGPEC*QGPVVDRR.C	Q9P1U0	0.94		R.FTSGQC*QVR.V	Q99943	1.2		K.MC*RDYPQLVLPNFDMLYNHVK.Q	Q9HAV4	1.29
R.VLVQMC*K.M	Q70J99	0.94		K.LTGMAFRVPTANVSVVDLTC*R.L	P04406	1.19		K.CGEPSRPAAC*R.A	Q9H8P0	1.29
K.ENC*GIYFPEIK.R	Q5TFE4	0.94		R.NC*SSFLIK.R	P46779	1.19		R.SPAESAAAGLTC*LPSVTR.G	Q587I9	1.29
R.DHQPC*IIFMDEIDAIGGRR.F	P62333	0.94		R.AAPAGGFQNIAC*LR.S	Q9UBP6	1.19		R.TEAYEYAQSLGAETC*PLPSFQVFK.F	O15027	1.29
R.FC*ADHPFLFFIQHSK.T	P35237	0.93		K.C*DSMTMTPGPWLGLPAVPAVTLYK.H	Q6P996	1.19		R.TVPFLPLLGGC*IDDTILSR.Q	Q7Z7H8	1.29
K.TLTSGGHAEHEGKPYC*NHPCYAAMFGPK.G	P50238	0.93		K.HHPDLIFC*R.K	Q7RTV0	1.19		R.VC*DYHTK.L	Q9Y2X0	1.29
R.EC*ISIHVGQAGVQIGNACWELYCLEHGIQPDGQMPSDK.T	Q71U36	0.93		R.C*FGC*AVIEDTWHYFLHR.L	Q15800	1.19		R.VDDHDSEEICLDHLC*K.G	Q7Z2W4	1.29
K.ALIVGHC*MPGPR.M	Q6P1L8	0.93		K.C*KTPQGQR.L	P43246	1.19		R.VVVLMGSTSDLGHC*EK.I	P22234	1.29
K.QTISNAC*GTIGLIHAIANNKDK.M	P15374	0.93		K.STLTDSLVC*K.A	P13639	1.19		R.YVPVSC*EKEVDALLHLAR.Q	Q9BW19	1.29
K.AGEGTYALDSESC*MEK.L	O00541	0.93		R.AITIAGVPQSVTEC*VK.Q	Q15365	1.19		K.NADMSEEMQQDSVEC*ATQALEKYNIEK.D	P63167	1.29
K.VC*EDLDTSVNLAWTSGTNCTR.F	P45880	0.93		R.LLQDYPITDVC*QILQK.A	Q9NVG8	1.19		K.VC*ASGMK.A	P24752	1.28
K.YMAC*CLLYRGDVVPK.E	A6NHL2	0.93		R.VGMGSGSIC*ITQEVLAC*GRPQATAVYK.V	P12268	1.19		K.C*ITDTLQELVNQSK.A	O75694	1.28
K.YMAC*CLLYRGDVVPK.D	P68366	0.93		K.LLAC*IASRPGQC*GR.A	P62241	1.19		K.TSSDPTC*VEK.E	O14980	1.28
K.YMAC*CLLYRGDVVPK.D	Q71U36	0.93		K.NIC*FTVWDVGGQDR.I	P18085	1.19		R.LSLLEEYGCC*K.E	P53350	1.28
K.SLDDSQC*GITYK.M	Q9NVG8	0.93		K.ASDHGWVC*DQR.V	Q9HC36	1.19		K.AGKLC*VPAMNVNDSVTK.Q	O43865	1.28
K.LGGSLIVAFEGC*PV.-	P60981	0.93		K.LLVGNKC*DLTTKK.V	P62820	1.19		K.AGKLC*VPAMNVNDSVTK.Q	Q96HN2	1.28
K.LLSLLPLSC*QK.R	Q9Y289	0.93		K.C*QNALQQVTAR.Q	O94808	1.19		R.QSC*YLC*DLPR.M	Q7Z5L9	1.28
R.AAQLC*GAGMAAVVDKIR.E	P19367	0.93		K.C*SWLVVQCLQR.A	P14324	1.19		R.QSC*YLC*DLPR.M	Q9H1B7	1.28
K.AC*GEAHLK.T	Q9Y315	0.93		K.DNQNFC*VPC*YEK.Q	Q14192	1.19		R.VHTIVISVQHDEEVC*LDEMRDALKEK.V	P31153	1.28
K.ALLGLVQDVIGDLHQC*QR.T	Q70J99	0.93		K.YKEHPEALSC*LLLQLR.R	Q68E01	1.19		R.C*SDAAGYPHATHDLEGPPLDAYSIQGQHTISPLDLAK.L	Q15365	1.28
K.AQANC*R.V	Q9HAV4	0.93		R.ETINC*LK.N	O95619	1.19		K.NAIDDGC*VVPGAGAVEVAMAEALIK.H	P40227	1.28
K.AVQC*LNTSSK.E	Q5T4S7	0.93		R.EVAESC*KDIK.F	P50213	1.19		R.RAPLRPEVPEIQEC*PIAQESLESQEQR.A	Q9H840	1.28
K.AYHEQLSVAEITNAC*FEPANQMVK.C	P68366	0.93		R.IEC*SHIR.H	Q9Y3C1	1.19		R.LVVPATQC*GSLIGK.G	Q15365	1.28
K.AYHEQLSVAEITNAC*FEPANQMVK.C	Q71U36	0.93		K.MFFIQAC*R.G	P42575	1.19		R.LLGSTIPLC*SAQWER.M	P50416	1.28
R.C*MTNTPVVVR.E	P32322	0.93		K.MLDEQDVPAAEQMC*FETSAK.T	Q9NX57	1.19		R.AAYEAFC*R.W	P51649	1.28
R.C*PLIFLPPVSGTADVFFR.Q	Q9NZD8	0.93		R.NEDAC*R.Y	O43760	1.19		K.AIAESLNSC*RPSDASATR.S	Q96RL1	1.28
R.EHYSSLC*SLSDQLAGK.I	Q658P3	0.93		R.KNSNVDSSYLESLYQSC*PR.G	Q7Z2W4	1.19		K.AIMMASQSLMC*GHQDVMVAGGMESMSNVPYVMNR.G	P24752	1.28
K.GLIAAIC*AGPTALLAHEIGFGSK.V	Q99497	0.93		K.QATEGPC*K.L	Q5T8D3	1.19		K.ASDHGWVC*DQR.V	Q9HC36	1.28
K.GPFVEAEVPDVDLEC*PDAK.L	Q09666	0.93		K.SNSLIHTEC*LSQVQR.I	O43929	1.19		R.ATLEC*HPLTMTDPIEEHR.I	Q99661	1.28
K.TVYKGPNC*IEHNEALLEEAK.M	Q13546	0.93		R.SSGC*FPNMAAK.V	Q96I24	1.19		K.C*GFSELYSWQR.E	Q9NSE4	1.28
K.LQLIPGVC*GFR.I	Q16719	0.93		R.YAIC*SALAASALPALVMSK.G	P36578	1.19		R.C*LVVDEADR.M	Q9GZR7	1.28
-.MILNSLSLC*YHNK.L	Q9NX74	0.93		K.YIVTC*AVVQK.S	P51808	1.19		R.RKEILLEGC*AEK.S	Q6PID6	1.28
K.YYRPTEVDFLQGDC*TK.A	O60547	0.93		R.YNVGC*TK.R	Q8IXK0	1.19		R.ELSFSGIPC*EGGLR.C	Q9NVG8	1.28
R.QSC*ATVQR.L	O00273	0.93		R.KGFSC*VKNELLPSHPLELSEK.N	Q9Y244	1.19		R.GSC*GSSGR.T	Q9UPN9	1.28
R.SNC*MDC*LDR.T	Q9NTJ5	0.93		R.LVQAFQYTDKHGEVC*PAGWKPGSETIIPDPAGK.L	Q13162	1.19		R.LMDVC*ATSR.T	P11802	1.28
R.TSLDLYANVIHC*K.S	P51553	0.93		K.IIPAIATTTAAVVGLVC*LELYKVVQGHR.Q	P22314	1.18		K.MYGAQEDGSVGEGDLSC*ILK.T	Q8NF37	1.28
K.ADPDGPEAQAEAC*SGER.T	Q9NX24	0.93		R.NFNYHILSPC*DLSNYTDLAMSTVK.Q	Q9UKF6	1.18		K.QKPGHPEC*DILTNVFAILSAK.N	O75691	1.28
R.NC*SSPEFSK.T	Q99829	0.93		R.VRGDNYC*ALR.A	Q96BN8	1.18		R.QYYAYLTDTQC*KR.V	P48651	1.28
K.AC*QVTQSR.N	Q14919	0.93		R.AC*AVEVK.R	Q8WX92	1.18		K.SEGTYC*CGPVPVR.A	P21980	1.28
K.EREFLFNAIETMPC*VK.K	P31350	0.92		K.QTISNAC*GTIGLIHAIANNKDK.M	P15374	1.18		K.SEGTYCC*GPVPVR.A	P21980	1.28
K.GELGC*FLSHYNIWK.E	Q8NBJ5	0.92		R.LHYGTDPC*TGQPFRFPLVSVR.N	Q8NFF5	1.18		R.SPVPLTPPGC*VALDTR.A	Q567V2	1.28
R.MC*YLTIK.E	Q9Y678	0.92		R.AQLTQLFLASVLEC*PFYKGPK.L	Q14CZ7	1.18		R.SQLELLISPTCSC*K.Q	Q29RF7	1.28
R.ALEFAPAC*HR.F	Q99615	0.92		K.SAGGIGVAVSC*IR.A	P23921	1.18		R.TSC*GSPNYAAPEVISGR.L	P54646	1.28
R.EFRGLGDC*LVK.I	P05141	0.92		K.TC*NTMNQFVNK.F	Q7L5N1	1.18		R.TSC*GSPNYAAPEVISGR.L	Q13131	1.28
R.EFRGLGDC*LVK.I	P12236	0.92		K.IHFVPGWDC*HGLPIEIK.V	Q9NSE4	1.18		R.VTPLGYVLPSHVTEEMLWEC*K.Q	Q2TAL8	1.28
K.IGRDQELYFFHELSPGSC*FFLPK.G	P26639	0.92		R.SAGAC*TAAAFLK.E	P28838	1.18		R.AC*AVEVK.R	Q8WX92	1.27
R.GLYDGPVC*EVSVTPK.T	Q16555	0.92		K.KVLTGVAGEDAEC*HAAK.L	O95373	1.18		K.LGVENC*YFPMFVSQSALEK.E	P07814	1.27
K.VFANPEDC*VAFGKGENAK.K	P10620	0.92		K.LRELSFSGIPC*EGGLR.C	Q9NVG8	1.18		K.LVC*GMVSYLNDLPSQR.I	Q15067	1.27
R.RTGC*TFPEKPDFH.-	P55263	0.92		K.SAC*SLESNLEGLAGVLEADLPNYK.S	Q09161	1.18		K.HAQPALLYLVPAC*IGFPVLVALAK.G	Q8TCT9	1.27
R.VEAEGLAALHSLTAC*LSR.S	Q96T76	0.92		R.LQTQPPSLPGQPPMYSGTFDC*FRK.T	O43772	1.18		R.SCYDLSC*HAR.A	P41250	1.27
K.AAADGDRDC*VLQK.S	Q96D53	0.92		K.RPVFPPLC*GDGLLSGKEETR.K	Q9NRX1	1.18		K.SSGTFLSGLSDC*TNVTFSK.V	Q5JTH9	1.27
R.RC*DAGGPR.Q	Q9NXG2	0.92		R.VNKVIEINPYLLGTMSGC*AADCQYWER.L	P28062	1.18		K.LVRGDAHEC*FVSPVAK.A	Q6UB35	1.27
R.SKDC*AYK.W	Q9H5Q4	0.92		R.DTQTSITDSC*AVYR.V	Q9Y5M8	1.18		K.KTYITDPVSAPC*APPLQPK.G	Q93052	1.27
R.LLLPGWC*HLTVEDGPR.E	Q9UBB6	0.92		R.KVLCGDAGEDAEC*HAAK.L	O15397	1.18		K.AGQNLLEMMAC*DR.L	Q99666	1.27
K.KGKEFEFSQLPLKVEFLEC*SAK.G	Q9Y5M8	0.92		R.GVNEDTYSGILDC*AR.K	Q9H936	1.18		K.ALAVC*HGPLDHYDFLIK.A	Q8WV93	1.27
K.MYGISLC*QAILDETKGDYEK.I	P04083	0.92		K.EGILNDDIYC*PPETAVLLASYAVQSK.Y	P26038	1.18		R.RASC*FAVALALNQNEMAK.A	Q8WV60	1.27
K.NNTQVLINC*R.N	P62316	0.92		R.FC*LICNYVSR.I	P35249	1.18		R.ATC*TLSGNRDTLWHLFNTLQR.R	Q7Z434	1.27
R.YIAFDFHKEC*K.N	Q9NTJ5	0.92		R.GIDQC*IPLFVEAALER.L	O95373	1.18		K.C*NGQPVPFQQPK.H	Q9NRZ9	1.27
R.VC*NALALLQC*VASHPETR.S	Q92600	0.92		R.GLC*FPLVK.A	Q8TB61	1.18		K.C*QIIYPR.Q	Q15645	1.27
R.ISLGLPVGAVINC*ADNTGAK.N	P62829	0.92		R.GTIC*NPGPR.K	Q8NCG7	1.18		K.C*VAIGNPVHLK.C	Q15911	1.27
R.AC*SNPSFLR.F	Q6N075	0.92		R.IAALQC*MHALTR.L	Q96T76	1.18		R.LKDALLDHDLALPLC*LLMAQQR.N	Q8NI27	1.27
K.LVQTPLTDRC*YLTMTQALEAR.L	Q14204	0.92		R.LDQLLGPSC*SR.W	Q92508	1.18		R.RDC*QEQAK.I	P12270	1.27
K.FTPYVGPIIPC*ILK.A	Q92616	0.92		R.MC*YLTIK.E	F6X838	1.18		R.FHPELWC*SGR.S	Q8IWB1	1.27
R.GC*PGAAAAALWR.E	Q96EB6	0.92		R.MC*YLTIK.E	Q9Y678	1.18		K.QVVEEPSPQLPADRFSPEFVDFTAQC*LR.K	P46734	1.27
R.IC*YIFHETFGR.T	O00429	0.92		K.QGFGNLPIC*MAK.T	P11586	1.18		R.LNNLIC*DESDVKDLAFK.L	Q96EB1	1.27
K.LGSTAIGIQTSEGVC*LAVEKR.I	P28066	0.92		K.SFVQWLGC*R.S	O60502	1.18		K.LSDFGLC*TGLK.K	Q15208	1.27
K.LTDQLPLIIVC*DR.F	Q00610	0.92		K.SFYGSTLFLC*R.R	P49327	1.18		K.LSDFGLC*TGLK.K	Q9Y2H1	1.27
R.NC*LQVLNPETR.T	Q7Z6M1	0.92		K.SSFTVDC*SK.A	P21333	1.18		R.LSLLEEYGC*C*K.E	P53350	1.27
R.NEDSQSIVWVHAFPELFLSC*LNHPDKK.I	Q9UBB4	0.92		K.STDFLPVDC*PVR.S	Q63HN8	1.18		K.QQYLC*QPLLDAVLANIR.S	Q96RN5	1.27
K.VKNEGGEC*KPEGLFR.R	O43683	0.92		R.YC*AQDAFFQVK.E	Q13011	1.18		K.SC*LEFSLR.I	Q7L5Y9	1.27
K.GKNENSEC*PKKEPK.A	Q9NW13	0.92		K.EILKWEALHAAECPC*GPSLIR.F	P53701	1.18		K.VC*EDLDTSVNLAWTSGTNC*TR.F	P45880	1.27
R.EVLEHPWITANSSKPSNC*QNK.E	O14965	0.92		R.VPTANVSVVDLTC*RLEKPAKYDDIK.K	P04406	1.17		R.VTC*IDPNPNFEK.F	Q9H8H3	1.27
R.QLPSLAC*K.Y	P42166	0.92		K.VGTGEPCC*DWVGDEGAGHFVK.M	P52209	1.17		K.VVAAC*AMPVMK.G	P28331	1.27
K.SNC*HNK.N	Q9NVR7	0.92		R.KVAC*IGAWHPAR.V	P39023	1.17		K.C*DMEAKR.K	P51153	1.27
R.VVTC*SLLALKR.L	O94822	0.92		R.IC*DEC*NYGSYQGR.C	Q7RTV0	1.17		K.LCSLLDSEDYNTC*EGAFGALQK.I	Q92973	1.26
K.AALC*HFCIDMLNAK.L	P54920	0.91		R.HSDGNLC*VK.V	P49458	1.17		R.C*AGPTPEAELQALAR.D	Q15050	1.26
K.VVLDNIHGC*PLR.I	Q9NYY8	0.91		K.LTAC*QVATAFNLSR.F	O95671	1.17		K.QC*VDHYNEVK.S	O95299	1.26
R.KVIGIEC*SSISDYAVK.I	Q99873	0.91		K.NMITGTAPLDGC*ILVVAANDGPMPQTR.E	P49411	1.17		K.LQILNSIFPGIGC*PVPR.I	Q9NX47	1.26
K.KLAVSSAC*.-	Q15437	0.91		K.SISLLC*LEGLQK.I	Q9NVI1	1.17		R.DLQPFPTC*QALVYR.G	Q14137	1.26
K.YGAVDPLLALLAVPDMSSLAC*GYLR.N	P52292	0.91		R.SVLGGDC*LLK.F	P41240	1.17		R.C*IPALDSLTPANEDQK.I	P10809	1.26
R.YIFDAEC*ALEK.L	P09884	0.91		K.ACDLGHIWAC*ANASR.M	Q96BR5	1.17		K.ACQVAHC*ASSR.Q	Q92793	1.26
K.YMAC*CLLYR.G	A6NHL2	0.91		K.AIELNPANAVYFC*NR.A	O43765	1.17		K.ALMGLYHGQVLC*K.K	P40939	1.26
K.YMAC*CLLYR.G	P68366	0.91		R.C*EPITSK.T	Q9UIA9	1.17		R.C*AADAGMKR.A	Q8N2K0	1.26
K.YMAC*CLLYR.G	Q71U36	0.91		K.ECEHCDC*LQGFQLTHSLGGGTGSGMGTLLISK.I	Q9BUF5	1.17		K.GKVNKEEAPHDC*AAR.E	Q8IU60	1.26
K.KYNPTWHC*IVGR.N	P63167	0.91		K.FASYC*LTEPGSGSDAASLLTSAK.K	Q9UKU7	1.17		R.SKLESLC*R.E	Q9NUQ3	1.26
K.YNPTWHC*IVGR.N	P63167	0.91		R.GLDFLHANC*IVHR.D	P11802	1.17		K.LGC*FEIAK.M	O60502	1.26
K.KYNPTWHC*IVGR.N	Q96FJ2	0.91		K.LHEQLTESEQAAQC*YIK.Y	Q9UJX2	1.17		R.NLC*YHAQTR.H	Q7Z6Z7	1.26
K.YNPTWHC*IVGR.N	Q96FJ2	0.91		R.LNNLIC*DESDVK.D	Q96EB1	1.17		K.DVNLRPEQLGDIC*VGNVLQPGAGAIMAR.I	P09110	1.26
R.AVGIWHC*GSC*MK.T	P61513	0.91		K.NFLGSC*DPQVILK.Q	P50748	1.17		K.EAASLLEAGEERPGEQSQGTQSQGSALQDPEC*FAHLLR.F	O00255	1.26
K.KLNCQVIGASVDSHFC*HLAWVNTPK.K	Q06830	0.91		R.NQLDAVLQC*LLEK.S	Q96GY3	1.17		R.TECNQC*K.A	Q01844	1.26
K.LNCQVIGASVDSHFC*HLAWVNTPKK.Q	Q06830	0.91		R.NYLSC*DVEVR.R	P43304	1.17		R.RTGC*IGAK.H	P62913	1.26
R.DHKAC*LPDAK.T	O15091	0.91		R.QILC*QFIDR.I	Q13535	1.17		R.ILTSWEENDRVQC*AGGPR.K	Q9UPN7	1.26
K.ADTLTPEEC*QQFKK.Q	Q16181	0.91		R.VAVVC*SSNQNR.S	Q9NP77	1.17		R.VQVMDAC*LR.C	Q9UBF6	1.26
K.ALC*NIVNNK.M	O60921	0.91		K.YSQIPSVLVMNKVDC*LK.Q	O75616	1.17		R.SWLADVAEKDPDEDC*RTLALR.A	Q9Y4R8	1.26
K.ALEEGLTPQEIC*DKYHIIHADIYR.W	P56192	0.91		R.VDTIGQMSC*NPSFGGIGK.G	Q9Y2Z2	1.17		R.VFANAPDSAC*VIGLKK.K	P17858	1.26
R.ALVGLC*K.L	Q9H3U1	0.91		R.VILITPTPLC*ETAWEEQCIIQGCK.L	Q2TAA2	1.17		K.TC*TTVAFTQVNSEDKGALAK.L	P62424	1.26
R.C*IQAC*GQER.G	Q96FC9	0.91		K.TLTSGGHAEHEGKPYCNHPC*YAAMFGPK.G	P50238	1.17		K.IVQIPFC*GEIDCEDWIKK.T	P07814	1.25
R.C*YDIIPETLLELGEIPTLK.T	Q13309	0.91		K.TNMLLQLDGSTPIC*EDIGR.Q	O75439	1.16		K.SLKEMETPLSALGIQDGC*R.V	Q99933	1.25
K.EAPDGC*PDHVLR.A	Q9UBB6	0.91		R.IWGTEGDSWIC*K.S	O76071	1.16		R.IQFNDLQSLLC*ATLQNVLR.K	Q14974	1.25
K.ENSSC*GR.F	Q9Y2T2	0.91		K.TFVGTPC*WMAPEVMEQVR.G	O95747	1.16		K.TVFAEHISDEC*K.R	P39023	1.25
R.LKESVAPVLSVLTEC*AR.M	Q9NPQ8	0.91		K.TFVGTPC*WMAPEVMEQVR.G	Q9UEW8	1.16		K.KLGGTIDDC*ELVEGLVLTQK.V	P50991	1.25
R.ETVSEESNVLC*LSK.S	P13639	0.91		K.IIDINYYPVPEAC*LSNK.R	P23921	1.16		R.IIKPC*NHVLSLSFPIRR.D	P00367	1.25
R.EVLTSLLQVTEC*GSVAGFLHGENEDEKGR.L	Q6NXR4	0.91		K.LC*SLLDSEDYNTCEGAFGALQK.I	Q92973	1.16		R.IIKPC*NHVLSLSFPIRR.D	P49448	1.25
K.FDDLQFFENC*GGGSFGSVYR.A	Q9NYL2	0.91		K.LCSLLDSEDYNTC*EGAFGALQK.I	Q92973	1.16		R.IATPLLC*WFR.Y	Q9H6V9	1.25
K.GLEC*SPSTPTMNSYFYK.F	Q08AM6	0.91		K.AC*LDTAVENMPSLK.M	P49327	1.16		R.SQEATEAAPSC*VGDMADTPR.D	Q9UHD8	1.25
R.IVDDC*GGAFTMGVIGGGVFQAIK.G	O60830	0.91		R.ANVIANINNC*LSFR.M	Q03169	1.16		K.LGC*QDAFPEVYDK.I	Q15392	1.25
K.IVDGAC*LNHFTR.I	O60921	0.91		R.ATPSC*PPEMK.K	Q6NUQ4	1.16		K.GLC*EKPLASAAAK.A	Q9Y5L0	1.25
R.LQTQPPSLPGQPPMYSGTFDC*FR.K	O43772	0.91		K.C*LLIHPNPESALNEEAGR.L	Q16763	1.16		R.QAVLGAGLPISTPC*TTINK.V	P24752	1.25
R.KVYPGLSC*FK.E	Q92830	0.91		R.DAC*FTSLMNTLMTSLPALVQQQGR.L	Q9UBB6	1.16		R.VGELVGVLAAHC*QGEGR.T	B0I1T2	1.25
R.KVYPGLSC*FK.E	Q92831	0.91		R.GPQC*EGHESR.A	A1X283	1.16		R.AEDQTESSC*ESHRK.S	Q9BU76	1.25
K.WDLFAC*NYK.L	Q8N3U4	0.91		K.IIEC*VSVHPHWK.V	O43156	1.16		K.ITLNDLIPAFQNLLKDC*EAEVR.A	P30154	1.25
K.KIADFLNSFDMSC*R.S	Q8WUW1	0.9		R.LLGC*LGSETR.R	Q03518	1.16		K.EQNYC*ESR.Y	Q7L5D6	1.25
R.C*ESAEPR.H	O94906	0.9		R.LPPQSC*LLLPPTPVR.G	O75691	1.16		R.KGGSYSQAASSDSAQGSDVSLTAC*KV.-	P05534	1.25
R.RVFIMDSC*DELIPEYLNFIR.G	P08238	0.9		R.KLSEEC*NSLSDVLDAFSK.A	Q9NYY8	1.16		R.KGGSYSQAASSDSAQGSDVSLTAC*KV.-	Q09160	1.25
K.LTAC*QVATAFNLSR.F	O95671	0.9		R.SDGKPC*PPFK.I	P35249	1.16		K.GTAVAIC*R.R	P16615	1.25
R.LGEINVIGEPFLNVNC*EHIK.S	P33991	0.9		K.VC*IESEHSMDTLLATLK.K	O00244	1.16		R.IEAVLPQC*DLNNLSSFATSVLR.W	Q53R41	1.25
R.DSKCEYPAAC*NALETLLIHR.D	P54886	0.9		R.VELPTC*MYR.L	Q13155	1.16		K.LGGSLIVAFEGC*PV.-	P60981	1.25
R.MLGETC*ADCGTILLQDK.Q	O60232	0.9		R.DSSLFDIFTLSC*NLLK.Q	Q9UIA9	1.15		K.LIIVEGC*QR.Q	P05023	1.25
K.VLSLC*GHEDWIR.G	Q6IA86	0.9		K.ALSGYC*GFMAANLYAR.S	P53618	1.15		K.LQVEPAVDTSGVQC*YGPGIEGQGVFR.E	P21333	1.25
K.VSLTPDFSAC*R.A	Q8N0V3	0.9		R.LSLLEEYGCC*K.E	P53350	1.15		K.NDITAWQEC*VNNSMAQLEHQAVR.I	O75934	1.25
K.GTWEELCNSC*EMENEVLK.V	O95573	0.9		K.C*CLTYC*FNKPEDK.-	P62979	1.15		R.LTLQKPSC*L.-	Q13309	1.25
R.MC*LAHSAGVVPTSQSLADMQDHAPAIGR.Y	Q5VYK3	0.9		R.AC*DSVTSNVLPLLLEQFHK.H	Q96T76	1.15		R.EVLEHPWITANSSKPSNC*QNK.E	O14965	1.25
K.GKEFEFSQLPLKVEFLEC*SAK.G	Q9Y5M8	0.9		R.AIVFSGC*GR.A	Q9BUL9	1.15		R.QLGLVVC*R.G	Q9UK45	1.25
K.FLTPC*YHPNVDTQGNIC*LDILK.E	O00762	0.9		K.GIRDTQC*GFK.L	Q9Y673	1.15		R.QMPVHYGC*K.E	F5H5P2	1.25
R.VGVDYEGGGC*R.F	Q02809	0.9		R.FIFTLVGGHISPLLVAC*EK.L	A1L0T0	1.15		R.QMPVHYGC*K.E	P12694	1.25
R.C*PIQLNEGVSFQDLDTAK.L	A6NDU8	0.9		R.FISYC*LK.F	O43683	1.15		R.SNC*MDC*LDR.T	Q9NTJ5	1.25
R.LSQEC*PIKEVVLYVKEEMK.R	Q9Y6E2	0.9		R.LC*TQLEGLQSTVTGHVER.A	Q6P2E9	1.15		R.SPMC*EYMINFIHK.L	P28347	1.25
R.AC*LQPSQDPQMR.L	Q86Y56	0.9		R.LGTEC*FLAQMR.A	O43264	1.15		R.SPMC*EYMINFIHK.L	Q99594	1.25
R.DSKC*EYPAAC*NALETLLIHR.D	P54886	0.9		K.LIAALSTPSQQVQESVASC*LPPLVPAIKEDAGGMIQR.L	Q92616	1.15		K.SPVTTLLEC*MHK.L	P55265	1.25
K.C*GSGPVHISGQHLVAVEEDAESEDEEEEDVKLLSISGK.R	P06748	0.9		K.NTVLC*NVVEQFLQADLAR.E	Q14258	1.15		R.VIAC*FDSLK.G	Q9NR56	1.25
R.C*LADAVVK.I	Q5TGZ0	0.9		R.SEVC*FGK.E	Q9BVP2	1.15		R.VVLLGEFLHPC*EDDIVCK.C	Q9NY12	1.25
K.C*QIIYPR.Q	Q15645	0.9		R.SSTETC*YSAIPK.A	O75369	1.15		R.YSGLC*PHVVVLVATVR.A	P11586	1.25
R.GC*IPTMAR.A	Q02978	0.9		K.SWC*GAC*K.A	O95881	1.15		R.LKNC*GC*LGASPNLEQLQEENLK.L	P54136	1.25
K.GMTSLQC*DCTEK.L	Q9BTE7	0.9		K.VEPC*SLTPGYTK.L	Q96EB1	1.15		R.VLKGNTAEGC*VHETQEKQK.A	Q9BQG0	1.25
K.GSPC*SEEAGTLR.R	Q9NVI1	0.9		K.VLCGDAGEDAEC*HAAK.L	O15397	1.15		R.EC*LPLIIFLR.N	P62701	1.24
K.RGVAC*TQPR.R	O43143	0.9		K.VMEMYQPSAVVLQC*GADSLSGDR.L	Q92769	1.15		K.YNPTWHC*IVGR.N	P63167	1.24
R.HGFC*GIPITDTGR.M	P12268	0.9		K.MSAFKENC*GIYFPEIK.R	Q5TFE4	1.15		K.YNPTWHC*IVGR.N	Q96FJ2	1.24
R.IESYSC*K.M	Q9H063	0.9		R.INALTAASEAAC*LIVSVDETIK.N	Q99832	1.15		K.ETTNIFSNC*GCVR.A	Q9UBB4	1.24
K.RLNLATEC*LPLDKYLQWEIGNK.N	Q7L0Y3	0.9		R.C*ASCPYLGMPAFKPGEK.V	Q6FI81	1.15		R.YIFDAEC*ALEK.L	P09884	1.24
K.LSTAC*PGR.V	P55060	0.9		R.RGGVPSLIAGLFVGC*LAGYGAYR.V	Q9Y6G1	1.14		R.VTC*ACQEHR.T	Q9BZG1	1.24
R.QC*SDSSAMESLTK.H	Q92616	0.9		R.AQSPIPNLYLTGQDIFTC*GLVGALQGALLCSSAILKR.N	Q6NUM9	1.14		K.SKGC*GVVK.F	P52272	1.24
R.QYAAC*EQR.L	Q96E22	0.9		R.DVAWAPSIGLPTSTIASC*SQDGR.V	P55735	1.14		R.GVAC*TQPR.R	O43143	1.24
R.SC*TVLNVEGDALGAGLLQNYVDRTESR.S	Q15758	0.9		R.TVLCGTC*GQPADK.A	P02545	1.14		K.LGWFDC*QKDDYVFR.N	Q9UIA9	1.24
R.SDLGPC*EK.I	O95232	0.9		K.EMIENC*LDAK.S	P40692	1.14		K.QHC*AYTIAK.Y	Q6YN16	1.24
R.ANVPNKVIQC*FAETGQVQK.I	Q00610	0.9		K.SSGQSAQLLSHEPGDPPC*LR.R	Q8N1F7	1.14		K.TAIHTAAMDMLGGPGIESQC*R.K	Q6YN16	1.24
K.EILKWEALHAAECPC*GPSLIR.F	P53701	0.9		K.YIYDQC*PAVAGYGPIEQLPDYNR.I	P31930	1.14		K.ATC*APQHGAPGPGPADASK.V	P21333	1.24
R.YFLWPLQHGTLHFC*GFK.V	P16083	0.9		R.C*GLQGHTGR.L	Q92508	1.14		R.RAPPGGC*EER.E	Q5RKV6	1.24
R.C*GAIAEQTPILLLFLLR.N	P42704	0.89		R.LVVPATQC*GSLIGK.G	Q15365	1.14		K.VTDDLVC*LVYK.T	P49458	1.24
R.IHEGC*EEPATHNALAK.I	Q00610	0.89		R.AGIPC*PTVVLLKK.H	O14730	1.14		R.KKTATAVAHC*K.R	P62249	1.24
K.HAQPALLYLVPAC*IGFPVLVALAK.G	Q8TCT9	0.89		R.NQC*EGIKK.Y	O14980	1.14		R.AC*WVLHYFCEVK.F	O95373	1.24
R.AIVDALPPPCESAC*TVPTDVDKWFHHQKN.-	Q15181	0.89		K.EWCFKPC*EIR.E	Q9Y2T3	1.14		K.AVVVDITEHC*H.-	O15431	1.24
R.AAQLEPITYMQGLSAC*EQIR.A	Q9HBH0	0.89		R.AASC*CAR.Y	Q6NUT3	1.14		R.C*YDIIPETLLELGEIPTLK.T	Q13309	1.24
R.KGADIMYTGTVDC*WRK.I	P12235	0.89		R.AASCC*AR.Y	Q6NUT3	1.14		K.C*YLQLAGVMGK.N	Q9Y4A5	1.24
R.KGADIMYTGTVDC*WRK.I	P12236	0.89		K.ADMTC*R.G	O14929	1.14		R.FLC*NSSQEWK.R	Q8WUK0	1.24
K.AFGELC*PNTAPLPQLVTEALQTGTTEWFHLK.Q	Q70J99	0.89		K.C*DSAFDIK.C	Q8N999	1.14		K.GC*VTIAIHAKPGSK.Q	Q8WUR7	1.24
R.SKDGVC*VR.V	P55786	0.89		K.KC*GHTNNLRPK.K	P62987	1.14		R.GVC*MYR.T	Q66K14	1.24
K.SIKDTIC*NQDER.I	Q9ULV4	0.89		R.C*QDVSAGSLQELALLTGIISK.A	Q92621	1.14		R.RPYGVGLLIAGYDDMGPHIFQTC*PSANYFDCR.A	P25786	1.24
K.ETIGVGSYSEC*KR.C	Q15418	0.89		K.C*VLNEGMPIYR.R	P31689	1.14		R.SGGLHC*SSNAIR.F	Q2M389	1.24
R.QYYAYLTDTQC*K.R	P48651	0.89		R.IKELASC*NPVVLEESK.A	Q9Y232	1.14		K.SVFEIGLC*SNR.M	P98194	1.24
K.AAPC*IYWLPLTDSQIVQK.E	Q9UKV3	0.89		R.FHC*DPTFWAK.N	Q9UPN9	1.14		R.TC*QEQR.L	Q3MHD2	1.24
K.C*VFSDHGLLTTVAYK.L	P32189	0.89		K.KGGGISFNSTVTLTQC*SEK.L	P55039	1.14		K.VGVGTC*GIADKPMTQYQDTSK.Y	O75940	1.24
R.ELSFSGIPC*EGGLR.C	Q9NVG8	0.89		R.GVVPVVMDC*ESTVQEK.A	P42695	1.14		K.VQYPQSQAC*K.M	Q14204	1.24
K.ICNEILTSPC*SPEIR.V	Q9BPX3	0.89		R.DKISDSNDQESANC*DAK.A	Q9Y5Q9	1.14		K.WLNVHYHC*SGAPAAPLQ.-	Q13555	1.24
R.LMDVC*ATSR.T	P11802	0.89		R.LC*TSATESEVAR.G	P31930	1.14		K.YGGVDGGC*FDR.H	Q9Y4B6	1.24
R.LQLEAC*GMR.R	Q9H4A6	0.89		R.LSIPTYGLQC*TR.A	P49327	1.14		K.YIC*PHAPR.I	O95372	1.24
K.NVIDGDLC*EQFNSMEPNKQK.N	Q15393	0.89		K.LTSENC*EHFVNELR.Y	P53816	1.14		K.KAC*TTEAHK.Q	Q16514	1.24
K.NYAEYQVC*LAAVGLVGDLCR.A	Q14974	0.89		K.MAFFTYPTLTEIC*R.R	Q9UI26	1.14		R.TPGAATASASGAAEDGAC*GC*LPNPGTFEECHRK.C	O96008	1.24
K.RPVFPPLC*GDGLLSGKEETR.K	Q9NRX1	0.89		K.LLSGLSKPVSSYPNTFEWQC*K.L	O43683	1.14		R.VGAPLIC*C*EIK.L	O60488	1.23
K.SCDPGLEDPC*GLNR.A	Q9HAV4	0.89		R.SC*WALAQAYNPMAR.D	P42345	1.14		R.IYGFYDEC*KR.R	P36873	1.23
R.SGQAGYVPC*NILGEARPEDAGAPFEQAGQK.Y	Q9H6S3	0.89		K.TAFSDC*TSK.I	Q13795	1.14		R.IYGFYDEC*KR.R	P62136	1.23
K.SNSLIHTEC*LSQVQR.I	O43929	0.89		R.ELLTEFGYKGEETPVIVGSALC*ALEGRDPELGLK.S	P49411	1.14		R.IYGFYDEC*KR.R	P62140	1.23
R.TGLC*YLPEELAALQK.L	Q13045	0.89		R.INPYMSSPC*HIEMILTEKEQIVPKPEEEVAQK.K	J3QL51	1.14		K.AAIGC*GIVESILNWVK.F	P11388	1.23
R.TLTGTVIDSGDGVTHVIPVAEGYVIGSC*IK.H	P61158	0.89		R.INPYMSSPC*HIEMILTEKEQIVPKPEEEVAQK.K	P18621	1.14		R.SNILTLMYQC*MQDKMPEVR.Q	Q92973	1.23
R.TTSQLC*WPLLK.Q	Q9HAV4	0.89		K.C*SSAFQNLLPFYSPVVEDFIK.I	Q96ER3	1.13		K.SVAWAPSGNLLATC*SR.D	O76071	1.23
K.VLGC*PEALTGSYK.S	Q14181	0.89		R.GLEAIC*AK.F	Q15392	1.13		R.IVSTSLDC*LQK.L	Q9Y6D6	1.23
K.VLPNDPVFLEPHEEMTLC*K.Y	P51946	0.89		K.LNQVC*FDDDGTSSPQDR.L	Q8N1F7	1.13		R.TSLDLYANVIHC*K.S	P51553	1.23
R.YC*ANAFK.L	P61221	0.89		R.IATPFQVYSWTAPQAEHAMDC*VR.A	O75153	1.13		R.ALC*DVGTAISCSR.V	E9PLN8	1.23
K.YNFHGTAEQDLPFC*K.G	P41240	0.89		R.LKQFLEC*SR.S	Q9UI26	1.13		R.ALC*DVGTAISCSR.V	Q9BQB6	1.23
R.YVVAVGLEC*GK.I	Q6IA86	0.89		K.KGAVEC*CPNCR.G	P31689	1.13		K.KLGNNC*VFAPADVTSEKDVQTALALAK.G	Q99714	1.23
R.YWLEEAEC*R.D	P55884	0.89		K.LFDDC*TQQFKAEK.L	Q13362	1.13		R.AAC*DLVR.G	P55060	1.23
R.TIQFVDWC*PTGFK.V	Q71U36	0.89		K.VC*FGIQLLNAVSR.V	Q99685	1.13		K.LILC*PLMAAVTYIDEK.R	P53350	1.23
K.LMSSLPNFC*GIFNHLER.L	Q96PU8	0.89		R.SGQGAFGNMC*R.G	P36578	1.13		K.VIEINPYLLGTMSGC*AADCQYWER.L	P28062	1.23
R.LNC*AEYK.N	Q8TB03	0.89		R.REEGDPSPHSGGVC*KPK.L	O75376	1.13		K.ADSC*SQAAGTK.G	Q9H7N4	1.23
R.KALC*DPLEEVR.E	Q92616	0.89		K.LREELGLC*ER.T	Q12789	1.13		R.ASVGC*GSEAAR.Y	Q63HN8	1.23
R.VCENIPIVLC*GNKVDIKDRK.V	P62826	0.88		R.APVFLQFC*DSGGR.G	Q4ZIN3	1.13		K.C*VLSGPPQLEK.Y	Q9BQ52	1.23
R.YADLTEDQLPSC*ESLKDTIAR.A	P18669	0.88		K.C*EVLQYSAR.E	O95299	1.13		R.C*YNEMALIR.V	Q9C0C9	1.23
K.TDLVPAFQNLMKDC*EAEVR.A	P30153	0.88		R.C*LWEESR.L	P40763	1.13		R.EKDFIILSC*VR.A	Q92900	1.23
K.GEYQGVFHC*AVETAK.L	B4DLN1	0.88		K.DAYC*CAQQGK.R	Q9NR33	1.13		K.EFC*TDSGLVVPSISYELHK.K	Q96F86	1.23
K.GEYQGVFHC*AVETAK.L	Q9UBX3	0.88		K.DAYCC*AQQGK.R	Q9NR33	1.13		R.ELALPGC*TSR.M	Q6ZRI6	1.23
R.KVFANPEDC*VAFGKGENAK.K	P10620	0.88		R.FALNHPELVEGLVLINVDPC*AK.G	Q9UGV2	1.13		K.IC*AFLLR.K	Q8N556	1.23
K.VIEINPYLLGTMSGC*AADCQYWER.L	P28062	0.88		R.FDC*NSVSTAAVLLADILPTLVIK.L	Q13286	1.13		R.IC*DDELILIK.N	P17987	1.23
K.C*ALGWDHQEK.L	Q14247	0.88		R.GIGDC*VR.Q	P53007	1.13		R.IC*DQSGVHYK.V	Q9Y2Z2	1.23
R.LFNTAVC*ESKDLSDTVR.T	Q9BXJ9	0.88		R.GLGSGLQPWC*PLDLR.L	P42695	1.13		R.LLLPGWC*HLTVEDGPR.E	Q9UBB6	1.23
R.LNLFYLANDVIQNC*K.R	Q5VT52	0.88		K.LFC*LTLHR.Y	Q92616	1.13		K.LLPC*LHSFC*LR.C	Q9UPN9	1.23
K.DNQNFC*VPC*YEK.Q	Q14192	0.88		K.LTTLPSDFC*GLTHLVK.L	Q96AG4	1.13		R.LSQEC*PIKEVVLYVKEEMKR.N	Q9Y6E2	1.23
K.MYGAQEDGSVGEGDLSC*ILK.T	Q8NF37	0.88		R.LVLSAQSC*FFR.S	Q9NVX7	1.13		R.LVVPATQC*GSLIGKGGC*K.I	Q15365	1.23
K.IIDINYYPVPEAC*LSNKR.H	P23921	0.88		R.ATEGMVVADKNC*SK.I	Q99436	1.13		R.NEDSQSIVWVHAFPELFLSC*LNHPDKK.I	Q9UBB4	1.23
R.IC*LDILKDKWSPALQIR.T	P61088	0.88		R.VRNC*SSPEFSK.T	Q99829	1.13		K.GKNENSEC*PKKEPK.A	Q9NW13	1.23
K.SKDYEFMWNPHLGYILTC*PSNLGTGLR.A	P12277	0.88		R.NQVDSETHC*HAER.C	Q9NRW3	1.13		K.IKNPSIDLCTC*PR.G	Q6P158	1.23
R.GIPMVLIGC*K.T	Q9HBH0	0.88		R.QLGLVVC*R.G	Q9UK45	1.13		R.NQSFC*PTVNLDKLWTLVSEQTR.V	P46776	1.23
R.RAPLRPEVPEIQEC*PIAQESLESQEQR.A	Q9H840	0.88		K.QMYC*VFNR.N	O43760	1.13		K.GKPHC*SR.N	Q02878	1.23
K.YIYDQC*PAVAGYGPIEQLPDYNR.I	P31930	0.88		K.QTFC*FMNR.R	Q8N556	1.13		R.QIFSC*GR.L	Q92925	1.23
K.ALVEFTNSPDC*LSK.C	Q9UIA9	0.88		R.TEAYEYAQSLGAETC*PLPSFQVFK.F	O15027	1.13		R.SPLC*EYMINFIHK.L	Q15561	1.23
R.AALQEELQLC*K.G	P49327	0.88		K.TGVTTAVIQPLSVPVQQVHSPTSYLC*RPDGTTTAYFPPVFTK.E	Q8WX93	1.13		K.KTATAVAHC*K.R	P62249	1.23
R.C*HWSDMFTGR.L	P46060	0.88		R.TPGAATASASGAAEDGAC*GC*LPNPGTFEECHRK.C	O96008	1.13		K.TTC*MSSQGSDDEQIKR.E	Q9P0V9	1.23
R.C*YYSNTDAVIYVVDSCDRDR.I	P40616	0.88		R.LSQEC*PIKEVVLYVK.E	Q9Y6E2	1.13		K.VLTAAGNSC*R.V	Q86W42	1.23
R.EQIDNLATELC*R.I	O95295	0.88		K.SSVHQPGSHYC*QGCAYK.K	Q9P021	1.13		K.VTPLQQMLASC*TGAILTSVIVTPLDVVK.I	Q8TBP6	1.23
K.FIYEGSSDFSC*LPTFGVIIGQK.S	P51659	0.88		R.RLDEC*EEAFQGTK.V	P61289	1.12		R.WICDC*CQR.A	Q8WUB8	1.23
R.IIQFQATPC*PK.E	Q06330	0.88		K.NQLC*DLETK.L	P26358	1.12		R.KNSNVDSSYLESLYQSC*PR.G	Q7Z2W4	1.23
K.IWDMTPVVGC*SLATGFSPH.-	Q8IWB7	0.88		R.LSPDVGHLVLTTLC*PALHALVADGLKPFRK.D	Q9BVN2	1.12		R.VGIIPPKGC*LLYGPPGTGK.T	P62333	1.23
R.LALC*SADSVAFPVLTHSTR.N	Q14C86	0.88		K.ATILDLSC*NK.L	Q96AG4	1.12		R.SSKQHYNC*EHSK.I	P50454	1.23
K.LC*YVGYNIEQEQK.L	P61160	0.88		R.VTSLGKDWHRPC*LK.C	P50238	1.12		K.YSNSALGHVNC*TIK.E	Q9NQC3	1.22
K.LGYAGNTEPQFIIPSC*IAIK.E	P61158	0.88		K.GYGC*AGVSSVAYGLLAR.E	Q92947	1.12		K.AVVVC*PK.D	Q00839	1.22
R.LLPQWIPLLAEC*PAITR.M	Q6ZUT9	0.88		K.NNTQVLINC*R.N	P62316	1.12		K.VLSECSPLMNDIFNKEC*R.Q	P53618	1.22
R.LTC*LFQIK.R	Q15386	0.88		K.YQTVIADIC*R.R	P37268	1.12		R.GVPGAIVNVSSQC*SQR.A	Q7Z4W1	1.22
K.LTPGC*EAEAETEAICFFVQQFTDMEHNR.V	P49327	0.88		K.ALANVNIGSLIC*NVGAGGPAPAAGAAPAGGPAPSTAAAPAEEKK.V	P05386	1.12		R.AVLLVGLC*DSGK.T	Q9Y5M8	1.22
K.LVTGSLIAC*HR.L	Q9UPU5	0.88		K.AILTDQPMIC*TPR.L	Q8IZV5	1.12		K.VAC*IGAWHPAR.V	P39023	1.22
R.NFEATLGWLQEHAC*SR.T	Q9P2J5	0.88		K.ALVGLVNDESPEIQAQC*NK.V	O43156	1.12		R.ALLDLC*AAPGGWLQVAAK.F	Q8IY81	1.22
R.NIDC*YSTDFC*VR.V	Q96N66	0.88		R.C*ALGVFR.K	Q13200	1.12		K.DLLPC*FPEGLVK.S	Q5JTH9	1.22
R.NLSFFLTPPC*AR.W	P42224	0.88		R.DC*GGAAQLAGPAAEADPLGR.F	Q9Y508	1.12		R.LVTEC*EQKK.L	Q06546	1.22
K.EATDPRPC*EVENAVESWR.T	P47755	0.88		K.SAPSIPKENFSC*LTR.L	P40925	1.12		K.GETALHRAC*INNQVEK.L	Q9BQI6	1.22
R.QAFHSHPGTHC*PSPAVKDPNTQSVGNPQR.I	O75616	0.88		R.FLC*ESVFSYQVASTLK.Q	Q96DE5	1.12		R.AC*LAEAITLVESTHSR.K	Q8IVH4	1.22
K.QC*EINYVK.K	Q14331	0.88		R.FWQAHSGIC*TR.T	Q9BVC4	1.12		R.AMELC*LALLLHK.G	Q9NY26	1.22
K.QC*EINYVK.K	Q9BZ01	0.88		R.GC*QDFGWDPCFQPDGYEQTYAEMPK.A	Q9BY32	1.12		R.RAPPGGC*EERELALALQEALEPAVR.L	Q5RKV6	1.22
K.QQYLC*QPLLDAVLANIR.S	Q96RN5	0.88		R.GC*QLTITFSVPNKDVFQELEKR.G	Q16719	1.12		R.VRDGLPLSASTDYEQSTGMQEC*R.K	Q96IW7	1.22
R.QYYAYLTDTQC*KR.V	P48651	0.88		K.KLSAEC*AK.Y	P14735	1.12		R.GIKDSIWGIC*TISK.L	O14681	1.22
K.SC*KPIPVMLLGVTLLK.K	P78383	0.88		K.MTGESEC*LNPSTQSR.I	Q9H2G2	1.12		K.SKEEAC*K.A	P22102	1.22
K.SVPTTQC*LDNSK.K	P46013	0.88		R.NC*SAVLCCR.M	Q9Y2G3	1.12		R.FALAC*NASDKIIEPIQSR.C	P35250	1.22
R.TAPSSSC*TAVASAASRPDSTHMVEAR.Q	Q9BTC0	0.88		K.NIAQIAVVMGSC*TAGGAYVPAMADENIIVR.K	Q9HCC0	1.12		K.FIDPFC*R.I	P56182	1.22
K.TFMC*TGRPGWLTVSLR.V	Q15392	0.88		K.NSC*SSSR.Q	P55786	1.12		K.ISGADINSIC*QESGMLAVR.E	P43686	1.22
R.TIQC*AK.A	O00764	0.88		K.RQEC*ETK.I	Q15311	1.12		K.LGEWVGLC*K.I	P25398	1.22
R.TTSFAESC*KPVQQPSAFGSMK.V	P49841	0.88		K.VIEINPYLLGTMSGC*AADCQYWER.L	P28062	1.12		K.ATGRPEC*FLTIQEGLASK.F	O00566	1.22
R.RVC*VTFR.E	Q9NXW9	0.88		R.ILTSWEENDRVQC*AGGPR.K	Q9UPN7	1.12		K.QC*PEDHLYVLEHNLHLLIR.E	Q9NVC6	1.22
K.VGVGTC*GIADKPMTQYQDTSK.Y	O75940	0.88		K.VSNTQYHEVMNLEPENTLDQHSFSLPTC*R.I	O43264	1.12		R.SNMC*WLRD.-	O75439	1.22
R.VPMASC*DFSIR.T	P04062	0.88		R.AGIPC*PTVVLLK.K	O14730	1.12		K.STC*VLEAFGNAR.T	B0I1T2	1.22
R.WTLGFC*DER.L	O95336	0.88		R.NQC*EGIK.K	O14980	1.12		R.TNFFLLLQAVNSHC*FPAFLAIPPTQFK.L	O14980	1.22
K.RYAIC*SALAASALPALVMSK.G	P36578	0.88		K.ADSC*SQAAGTK.G	Q9H7N4	1.12		R.VCVATC*NR.A	Q9Y223	1.22
R.LSQEC*PIKEVVLYVK.E	Q9Y6E2	0.88		K.YNPTWHC*IVGR.N	P63167	1.11		R.VFC*VEEEDSESSLQK.R	Q14684	1.22
K.GC*LELIK.E	P11586	0.88		K.YNPTWHC*IVGR.N	Q96FJ2	1.11		K.VLVTTNVC*AR.G	Q9NUU7	1.22
K.IFDDAYKSQLSC*VVVDDIER.L	P46459	0.87		K.TAIHTAAMDMLGGPGIESQC*R.K	Q6YN16	1.11		K.YDLLVSNAIQFLASVC*ERPHYK.N	P55060	1.22
R.FC*LIC*NYLSK.I	P40937	0.87		R.DSKCEYPAAC*NALETLLIHR.D	P54886	1.11		R.QGSEEC*QKFWTFFER.L	Q14147	1.22
K.ETTNIFSNC*GCVR.A	Q9UBB4	0.87		R.MKVAC*ITEQVLTLVNKR.I	P04843	1.11		R.LAAPDPC*DPQRWCHR.V	O60831	1.22
K.LTVIDTPGFGDHINNENC*WQPIMK.F	Q9UHD8	0.87		R.ALQLVQFDC*SPELFKK.I	Q8N2W9	1.11		R.LALFNPDVC*WDRNNPEPWNKLGPNDQYK.F	O00483	1.22
K.KFDEKENVSNC*IQLK.T	Q9ULC4	0.87		R.VGAPLVC*CEIK.L	O95573	1.11		R.KAEDIENDALSPEEQEEC*KNYLR.K	P49792	1.21
K.IISDNLTYC*K.C	Q9Y2X3	0.87		R.KC*STPEEIKKR.K	P60981	1.11		K.C*ASQVGMTAPGTR.R	Q99439	1.21
R.FC*QLLWRPRPPTLLSQEQIK.Q	P55884	0.87		R.VHTIVISVQHDEEVC*LDEMRDALKEK.V	P31153	1.11		R.SLLINAVEASC*IR.T	J3KR12	1.21
R.KVFANPEDC*VAFGKGENAKK.Y	P10620	0.87		K.CC*LTYC*FNKPEDK.-	P62979	1.11		R.SLLINAVEASC*IR.T	P32322	1.21
R.INPYMSSPC*HIEMILTEKEQIVPKPEEEVAQK.K	J3QL51	0.87		K.AVQADGQVKEC*YQSHR.D	Q8WUM4	1.11		R.SLLINAVEASC*IR.T	Q96C36	1.21
R.INPYMSSPC*HIEMILTEKEQIVPKPEEEVAQK.K	P18621	0.87		R.FHADSVC*K.A	Q9BW61	1.11		R.IVSGC*PLPEAC*ELYYVNR.D	Q9H0A0	1.21
K.QPAIMPGQSYGLEDGSC*SYKDFSESR.N	P14866	0.87		R.GNPVPILIPC*HR.V	P16455	1.11		R.AYGGSMC*AK.C	P49207	1.21
K.GADIMYTGTVDC*WRK.I	P12235	0.87		K.IEC*EIKINHEGEVNR.A	Q16576	1.11		K.VC*LLGDTGVGK.S	Q13636	1.21
K.GADIMYTGTVDC*WRK.I	P12236	0.87		K.ALANVNIGSLIC*NVGAGGPAPAAGAAPAGGPAPSTAAAPAEEK.K	P05386	1.11		K.VC*LLGDTGVGK.S	Q9UL26	1.21
K.NNASPFDAPC*R.T	E9PSI1	0.87		R.C*QRPVEPLWVEGAGHNDVELYGQYLER.L	Q5VST6	1.11		K.YIYDQC*PAVAGYGPIEQLPDYNR.I	P31930	1.21
R.YKDSLKEDIQKADLVISHAGAGSC*LETLEK.G	Q9NP73	0.87		R.EQVPSLGSNVAC*GLAYTDYHK.A	A1L0T0	1.11		K.SIKDTIC*NQDER.I	Q9ULV4	1.21
R.QLC*DNAGFDATNILNK.L	Q99832	0.87		K.EVC*TVVAR.R	P52789	1.11		K.TTSILC*LAR.A	P35250	1.21
K.ATC*APQHGAPGPGPADASK.V	P21333	0.87		R.FISFLQELSC*FVTR.C	Q2M389	1.11		K.AALC*HLLQYFLK.F	Q13535	1.21
K.C*PTQFPLILWHPYAR.H	Q96TA1	0.87		K.IC*NNMLLAISMIGTAEAMNLGIR.L	P31937	1.11		K.AATGEEVSAEDLGGADLHC*R.K	Q9HCC0	1.21
K.GALYC*ELC*YEK.F	Q96HC4	0.87		K.LLAEMLVQATQMPC*SLDKPHR.S	O00411	1.11		R.ANSSVVSVNC*K.G	O60502	1.21
R.ATEGMVVADKNC*SK.I	Q99436	0.87		R.LLNYPEEVDC*VGLIK.G	Q9C0F1	1.11		K.C*C*LTYCFNKPEDK.-	P62979	1.21
R.QTGHQC*GMSEK.A	Q6UWU4	0.87		K.LQVLVEEAFGC*QLQNR.D	Q5JPH6	1.11		K.C*GVPFTDLLDAAK.S	Q01433	1.21
R.VVSGMVNC*NDDQGVLLGR.W	P21980	0.87		K.NC*MTDLLAK.L	Q00765	1.11		K.GQVC*LPVISAENWKPATK.T	P68036	1.21
R.AIQTVSCLLQGPC*DAGNR.A	Q9H3U1	0.87		R.NLSFFLTPPC*AR.W	P42224	1.11		R.GTEAGQVGEPGIPTGEAGPSC*SSASDKLPR.V	O15355	1.21
R.AIVDC*GFEHPSEVQHEC*IPQAILGMDVLCQAK.S	O00148	0.87		K.NSSQETC*TR.A	Q6IA69	1.11		K.LFLDLAC*R.L	Q15771	1.21
R.AIVDC*GFEHPSEVQHEC*IPQAILGMDVLCQAK.S	Q13838	0.87		R.NTLANSC*GTGIR.S	Q96RE7	1.11		R.LGTEC*FLAQMR.A	O43264	1.21
K.ATNLC*FAER.N	Q92797	0.87		R.QVEVINFGDC*LVR.S	P46060	1.11		R.LLGVLAESC*GGK.W	Q9BW92	1.21
R.C*GGLPNNIVDVWEFLGKPK.H	O95551	0.87		K.SVAWAPSGNLLATC*SR.D	O76071	1.11		K.LTDFGFC*AQITPEQSKR.S	O75914	1.21
K.C*VAQASK.N	O00231	0.87		K.SVPLC*ILYEK.Y	P21980	1.11		K.LTDFGFC*AQITPEQSKR.S	Q13153	1.21
K.C*VTDECFFFER.L	P09038	0.87		R.VFSFEPVPSC*R.A	Q9NZC3	1.11		K.LTDFGFC*AQITPEQSKR.S	Q13177	1.21
R.DC*GGAAQLAGPAAEADPLGR.F	Q9Y508	0.87		K.VGTGEPC*C*DWVGDEGAGHFVK.M	P52209	1.11		K.MTGESEC*LNPSTQSR.I	Q9H2G2	1.21
K.EGTDSSQGIPQLVSNISAC*QVIAEAVR.T	Q99832	0.87		K.QKYFLVGAGAIGC*ELLK.N	P22314	1.11		K.QYVETHWC*AQSEK.F	Q96P70	1.21
K.EVVPLPQQVLC*LK.G	Q15751	0.87		K.AEAGEAGQATAEAEC*HR.T	O95671	1.11		R.SDLGPC*EK.I	O95232	1.21
K.GTC*VEGTIPK.L	Q93009	0.87		R.YSDESGNMDFDNFISC*LVR.L	P04632	1.1		R.SDLGPC*EKIHDENLR.K	O95232	1.21
K.IAC*NTHVAPR.M	Q9NVR7	0.87		K.LNLSC*IHSPVVNELMR.G	Q9Y2X3	1.1		K.TC*ATDLQTK.A	O95861	1.21
K.IGLAVC*YDMR.F	Q86X76	0.87		R.SKDGVC*VR.V	P55786	1.1		R.TIAPC*QK.A	P38646	1.21
K.LC*PGIQAK.L	Q8N2K0	0.87		K.NTPSFLIAC*NKQDIAMAK.S	Q9Y5M8	1.1		R.VNKVIEINPYLLGTMSGC*AADCQYWER.L	P28062	1.21
K.LSGSHLTPLC*YSFISYVQNK.S	Q9NVI1	0.87		K.AGKLC*VPAMNVNDSVTK.Q	O43865	1.1		R.VTYDSDATSSAC*R.E	O15243	1.21
R.QAAAIILNIYC*SR.S	Q92616	0.87		K.AGKLC*VPAMNVNDSVTK.Q	Q96HN2	1.1		R.YAALNLAALHC*R.F	Q9UJX4	1.21
K.SALC*NADSPKDPVLPMK.F	Q29RF7	0.87		K.GLC*EKPLASAAAK.A	Q9Y5L0	1.1		R.AC*DLPAWVHFPDTER.A	A0FGR8	1.21
K.SYC*NDQSTGDIK.V	P00492	0.87		R.AVGDGILC*NTYIDSYKGTVDC*VQAR.A	Q53EL6	1.1		K.AC*TTEAHKQR.M	Q16514	1.21
K.SYLYQILQGIVFC*HSR.R	P06493	0.87		K.QVSSSAAC*HSR.R	Q9NVM4	1.1		K.MLDPGLMTC*SK.Q	Q03701	1.21
K.VAC*ITEQVLTLVNK.R	P04843	0.87		K.IVC*TPGQGLGDLR.T	Q9Y5L0	1.1		K.GC*GTVLLSGPRK.G	Q07020	1.2
R.VLGC*ILSELK.Q	Q9H4L7	0.87		R.KLTAQEAC*GK.G	Q9Y232	1.1		K.GEYQGVFHC*AVETAK.L	B4DLN1	1.2
R.VHTIVISVQHDEEVC*LDEMRDALK.E	P31153	0.87		K.AC*VFGNEPK.A	Q8TB61	1.1		K.GEYQGVFHC*AVETAK.L	Q9UBX3	1.2
K.IVDAVIQEHQPSVLLELGAYC*GYSAVR.M	P21964	0.86		K.ALQLLHC*FPLDIR.L	A0AVT1	1.1		R.EGPAQPGAPLPTFC*WEQIR.A	Q9Y5Q0	1.2
K.LLLDNTQIMNALQKYPNC*PTDVR.Q	O43929	0.86		R.ELSFSGIPC*EGGLR.C	Q9NVG8	1.1		R.GKIGLDFC*K.Y	O00571	1.2
K.GC*TDNLTLTVAR.S	O00151	0.86		R.GMGMNSPELLLLVENC*PK.G	Q92797	1.1		R.GKIGLDFC*K.Y	O15523	1.2
R.ECISIHVGQAGVQIGNAC*WELYCLEHGIQPDGQMPSDK.T	Q71U36	0.86		K.LGCQDAFPEVYDKIC*K.A	Q15392	1.1		R.NLTGDVC*AVMR.V	Q92922	1.2
R.TAAPTVC*LLVLSQAEK.V	Q9NVI1	0.86		R.IC*SEEER.A	Q9NX63	1.1		R.GVLLHGPPGC*GK.T	O15381	1.2
K.C*VLPEEDSGELAKPK.I	Q9Y3F4	0.86		K.IVAC*DGK.N	P52657	1.1		R.DQSAQC*TASK.S	Q7Z6Z7	1.2
K.LNLSC*IHSPVVNELMR.G	Q9Y2X3	0.86		K.LFEPYVVHVLPHLLLC*FGDGNQYVR.E	Q92616	1.1		R.VFVLPC*IQQIQR.I	O75955	1.2
K.DAYCC*AQQGK.R	Q9NR33	0.86		K.QQLGTVRPGLGMTSVFIC*LR.G	Q6NUM9	1.1		K.C*VSSSHFQVAER.A	Q15172	1.2
R.INPYMSSPC*HIEMILTEKEQIVPKPEEEVAQKK.K	J3QL51	0.86		K.RPPTPC*SDPER.K	Q9BW71	1.1		K.NNLKDC*GLF.-	P04899	1.2
R.INPYMSSPC*HIEMILTEKEQIVPKPEEEVAQKK.K	P18621	0.86		R.QELSHALYQHDAAC*R.V	Q9UMS4	1.1		R.GAC*YGADHDLGR.L	Q6NUM9	1.2
R.KQC*VDHYNEVK.S	O95299	0.86		R.SGC*ALTDAVAPGNK.G	Q9BQ70	1.1		K.GLFYC*MWMQDKPLLQEELGR.T	P56182	1.2
K.QFLDFGSVNAC*EK.T	Q15118	0.86		R.SQC*LSTLVRPVFGELK.E	O00506	1.1		K.LSGSHLTPLC*YSFISYVQNK.S	Q9NVI1	1.2
K.FSFQC*PGR.M	Q13418	0.86		R.TQVC*GILR.E	P11413	1.1		R.NLAFIDWATPC*K.T	Q8NC26	1.2
R.SGQGAFGNMC*R.G	P36578	0.86		K.YIQAAC*K.T	Q00610	1.1		K.EVLAGRPLFPHVLCHNC*AVEFNFGQK.E	Q00839	1.2
R.TQNLPNC*QLISR.S	P37268	0.86		K.YMACC*LLYR.G	P68366	1.1		K.DMAGLLKPTAC*TMLVSSLR.D	P11498	1.2
K.C*LSPDLPLPKQLVC*R.W	Q9BZE0	0.86		K.YMACC*LLYR.G	Q71U36	1.1		K.QAVHC*IHAIFTNK.E	Q29RF7	1.2
R.C*AYVYK.A	P18077	0.86		R.LALFNPDVC*WDR.N	O00483	1.1		K.ARQDC*VK.E	Q9HC98	1.2
R.CFVSFPLNTGDLDC*ETC*TITR.S	Q9H061	0.86		R.EVFQTASERVEAEGLAALHSLTAC*LSR.S	Q96T76	1.1		R.QGC*PFQPWDGLEEHSQALSGR.L	Q9UH17	1.2
K.C*GFLPGNEK.V	Q9UL46	0.86		K.TAVC*DIPPRGLK.M	I3L2F9	1.1		K.QVASSTGFC*DQR.R	P11532	1.2
R.DANC*SVMR.F	Q9Y5L0	0.86		K.TAVC*DIPPRGLK.M	Q3ZCM7	1.1		R.SAGAC*TAAAFLK.E	P28838	1.2
R.DLPLMALPPC*HALCQFYVVNSELSCQLYQR.S	P04818	0.86		K.TAVC*DIPPRGLK.M	Q9BVA1	1.1		R.TQVC*GILR.E	P11413	1.2
K.DNMAQEGVILDDVDSSVC*R.D	Q9BV86	0.86		R.KKTATAVAHC*K.R	P62249	1.09		R.SLGKYGIIC*MEDLIHEIYTVGKR.F	P18124	1.2
R.GDGQFFAVSVVC*PETGAR.K	O95163	0.86		K.SC*NC*LLLK.V	P06733	1.09		K.VLCGDAGEDAEC*HAAK.L	O15397	1.2
R.GLC*FPLVK.A	Q8TB61	0.86		R.LIGPNC*PGVINPGECK.I	P53597	1.09		R.VVAAAFQSEDPADPC*ALLQRR.Q	Q8N8A6	1.2
K.GLQVGGC*EPEPQVC.-	P52888	0.86		R.NTWDC*GLQILK.K	P53007	1.09		K.EAIEGTYIDKKC*PFTGNVSIR.G	P62280	1.2
K.GLQVGGCEPEPQVC*.-	P52888	0.86		K.AQLVEIVGC*HFR.S	O75446	1.09		R.C*ILPFDKETGFHR.G	Q9GZT3	1.19
R.GTLWQC*KE.-	Q9BV44	0.86		K.LC*FLDKVEPHATIAEIK.N	Q9NZ01	1.09		K.EFDKKYNPTWHC*IVGR.N	P63167	1.19
R.KIC*ANDAIPK.T	Q96EY4	0.86		R.VGVDYEGGGC*R.F	Q02809	1.09		R.C*DRNLAMGVNLTSMSK.I	P12004	1.19
R.IEC*SHIR.H	Q9Y3C1	0.86		R.AVGDGILC*NTYIDSYKGTVDCVQAR.A	Q53EL6	1.09		R.KVFANPEDC*VAFGKGENAK.K	P10620	1.19
R.ILALDC*GLK.Y	P27708	0.86		R.AVLLVGLC*DSGK.T	Q9Y5M8	1.09		K.LNISFPATGC*QK.L	P62753	1.19
K.INQVFHGSC*ITEGNELTK.T	P78527	0.86		R.TVEIC*PFSFDSR.D	Q9ULW0	1.09		K.YAGLSTC*FR.Q	P49591	1.19
K.IPAILYLC*YTDVMK.L	O95456	0.86		K.AGEVVPPAMYQFSQYVC*QQTGLQIPQLPAPPK.I	Q5XKP0	1.09		R.TLSGMESYC*VR.A	P50991	1.19
R.ITC*HTVMEVLR.E	P42345	0.86		R.C*ESAEPR.H	O94906	1.09		K.TYAIC*GAIR.R	P63220	1.19
R.AVLGEVKLC*EK.M	P26641	0.86		R.DSSSLSSC*TSGILEER.S	Q9H3Q1	1.09		R.LSC*QNLGAVLDDVPVQGFFK.K	Q14690	1.19
R.NALVSHLDGTTPVC*EDIGR.S	P31930	0.86		K.EALPVSLPQIPC*LSSFK.I	Q9UHI6	1.09		K.ISEQIVIGTPGTVLDWC*SK.L	Q9NUU7	1.19
K.QLC*FQDQYVK.A	Q8TEQ6	0.86		K.GC*NIENACYPLGICAER.T	P32320	1.09		R.TLETANC*MSSQTK.N	P50416	1.19
K.TLSFYFPPC*GK.I	Q9UG63	0.86		K.GCNIENAC*YPLGICAER.T	P32320	1.09		R.AALEAC*HK.G	P11766	1.19
K.EFEFSQLPLKVEFLEC*SAK.G	Q9Y5M8	0.86		K.GGGQEC*GDSR.A	O43149	1.09		K.AC*FLGATVK.Y	Q9H9P8	1.19
K.VGC*FDPYSDDPR.L	Q15334	0.86		R.GNMVAQSSDVIAVC*QSLR.Q	Q96T76	1.09		K.KAYSFC*GTVEYMAPEVVNR.Q	Q15418	1.19
R.YHALLIPSC*PGALTDLASSGSLAR.I	Q8NB37	0.86		K.IC*SPDK.M	P46459	1.09		K.C*AAVDVEPPSK.Q	Q15020	1.19
K.QMYC*VFNR.N	O43760	0.85		K.LSIQC*YLSALDR.C	Q01581	1.09		R.C*SVSLSNVEAR.R	P47712	1.19
K.TMGFC*YQILTEPNADPR.K	O95373	0.85		K.NVEC*AR.V	Q9HD42	1.09		R.DTQTSITDSC*AVYR.V	Q9Y5M8	1.19
R.KGTDIMYTGTLDC*WRK.I	P05141	0.85		R.LRPFVDGTAGASDPPC*VR.G	Q14807	1.09		R.LKEC*EDASEEPEEKDANQGEK.K	Q8N370	1.19
K.VTVAGLAGKDPVQC*SR.D	Q99497	0.85		R.GALQAVDQLSLFRPLC*K.F	A1L0T0	1.09		K.SEKGPVC*WR.K	Q15910	1.19
K.YLLDSC*APLLR.Y	Q92616	0.85		R.SYC*FTANKPDGSIR.W	Q9BVK2	1.09		K.GYAICGLAWHPTC*GR.I	O75717	1.19
K.IAVAAQNC*YK.V	P60174	0.85		K.TPLVSSPMDTVTEAGMAIAMALTGGIGFIHHNC*TPEFQANEVRK.V	P12268	1.09		K.IVC*TPGQGLGDLR.T	Q9Y5L0	1.19
R.QVC*QLPGLFSYAQHIASIDGRR.G	Q9Y6C9	0.85		K.KTYITDPVSAPC*APPLQPK.G	Q93052	1.09		R.LC*PNSTGAEIR.S	P35998	1.19
R.ATLQAALC*LENFSSQVVER.H	E7ETI0	0.85		K.VGVGTC*GIADKPMTQYQDTSK.Y	O75940	1.09		K.LFTEVEGTC*TGK.Y	P62487	1.19
R.ATLQAALC*LENFSSQVVER.H	P59998	0.85		K.IIDINYYPVPEAC*LSNKR.H	P23921	1.09		R.LHYGTDPC*TGQPFRFPLVSVR.N	Q8NFF5	1.19
K.LAQAKEENVGLHQTLDQTLNELNC*I.-	P67936	0.85		R.LAGLTC*SGAEGLAR.P	Q8WV74	1.09		K.LLAC*IASRPGQC*GR.A	P62241	1.19
R.VICAEEPYIC*KDFPETNNILK.I	P49915	0.85		R.KAVVVC*PK.D	Q00839	1.08		R.KEDVTSKLDEKNNAFPC*QVNIK.Q	Q9NQW6	1.19
K.ALDVGSGSGILTAC*FAR.M	P22061	0.85		R.C*VPKDK.A	F8VZW7	1.08		K.SLVQNNCLSRPNIFLC*PEIEPK.L	Q8TAQ2	1.19
R.GC*QDFGWDPCFQPDGYEQTYAEMPK.A	Q9BY32	0.85		R.MLLGNKC*DMDDKR.V	P61026	1.08		R.DSLSNATPCAVLRPSGAVVTLEC*VEK.L	Q9Y314	1.19
R.TEVSLSAFALLFSELVQHC*QSR.V	Q8IUR0	0.85		R.KFLVHNVKELEVLLMC*NK.S	P62910	1.08		R.QLAQEAEAWLNYPC*FK.N	P00973	1.19
K.KALIVGHC*MPGPR.M	Q6P1L8	0.85		K.LYGIQAFC*KDLLEVADVLEK.A	Q9HAV7	1.08		R.SALSC*VISK.T	Q9UIG0	1.19
K.FSIQTMC*PIEGEGNIAR.F	Q13155	0.85		R.KKLDSLGLCSVSC*ALEFIPNSK.V	Q9BSH4	1.08		K.TASGWALALC*R.W	Q9NRG9	1.19
K.AIAC*VVTAC*SAELEK.S	Q5VYK3	0.85		R.AALQEELQLC*K.G	P49327	1.08		R.TPGAATASASGAAEDGAC*GCLPNPGTFEECHRK.C	O96008	1.19
K.ATAVC*SEK.L	Q9UMZ2	0.85		K.AHEILPNLVCC*SAK.N	P50990	1.08		R.VC*C*EGMLIQLR.F	Q96A33	1.19
R.C*EIEATLER.L	Q9NYL2	0.85		K.KC*AVPVETEWLK.S	Q8WYP5	1.08		K.VC*NVAPIAGETK.V	Q13823	1.19
K.C*GTGIVGVFVK.L	O00151	0.85		R.EKDILTAIAADLC*K.S	P51648	1.08		K.IGDLAC*ANIQHLSSR.S	Q7L8L6	1.19
K.C*KRDPHVK.I	Q96EH3	0.85		K.FIDPFC*R.I	P56182	1.08		R.VEC*QSHR.L	O14818	1.18
K.C*SVIRDSLLQDGEFSMDLR.T	P07737	0.85		K.IAPGAVVC*VESEIR.G	O00399	1.08		K.VNC*LDKFWHK.A	Q14847	1.18
R.C*SWLVPSPK.V	Q3SXM5	0.85		K.ITSAVWGPLGEC*IIAGHESGELNQYSAK.S	Q13347	1.08		R.LLPQWIPLLAEC*PAITR.M	Q6ZUT9	1.18
K.KC*TLDQAFR.G	Q96FV9	0.85		R.LMSSAEEC*CR.N	Q8N201	1.08		K.GLESTTLADKDGEIYC*K.G	P21291	1.18
K.EVC*QLLPFLVR.Y	Q9UBB6	0.85		R.LMSSAEECC*R.N	Q8N201	1.08		R.YGDGGSTFQSTTGHC*VHMR.G	P31943	1.18
R.GTAAC*ADVR.G	Q8N1B4	0.85		R.NYLLQC*TR.N	Q96QK1	1.08		K.FSPDLWGVSVC*TVDGQR.H	O94925	1.18
R.LAAC*VNLIPQITSIYEWK.G	O60888	0.85		R.LAVTRPHLQAYLC*LAK.A	Q9NX61	1.08		R.KVAC*IGAWHPAR.V	P39023	1.18
K.LASGC*DGSEIPDEVK.L	Q9UEW8	0.85		K.VC*NNPGLYSNPDLSAAASLALGK.F	Q15021	1.08		K.AGGLGINLTSANVVILHDIDC*NPYNDKQAEDR.C	Q9H4L7	1.18
K.LESGSIC*K.G	P15170	0.85		R.VVTQNIC*QYR.S	Q8N163	1.08		R.ALGGC*TRPHVILR.E	Q9NNW5	1.18
R.SKLESLC*R.E	P40222	0.85		R.YYSSEYHYVGGFYGGC*NEALMK.L	P53634	1.08		R.ALTVAHELLC*NKPEEEK.A	Q03701	1.18
R.SKLESLC*R.E	Q9NUQ3	0.85		K.GNC*SQHDR.A	Q9BRX2	1.08		R.AQSPIPNLYLTGQDIFTC*GLVGALQGALLCSSAILKR.N	Q6NUM9	1.18
K.LTTLPSDFC*GLTHLVK.L	Q96AG4	0.85		R.IVVEHIIMKPAC*PLFVR.R	P57088	1.07		R.SKDC*AYK.W	Q9H5Q4	1.18
R.LVPC*ILEAAK.Q	Q96ER3	0.85		R.TSAC*GLFSVCYPR.V	P30153	1.07		K.GPTKEELC*K.S	Q96TA1	1.18
R.MESC*LAQVLQK.D	Q7Z460	0.85		R.TSAC*GLFSVCYPR.A	P30154	1.07		K.ELANSPDC*PQMCAYK.L	P48739	1.18
R.NALANPLYC*PDYR.I	P22695	0.85		K.GQVC*LPVISAENWKPATK.T	P68036	1.07		R.GC*QDFGWDPCFQPDGYEQTYAEMPK.A	Q9BY32	1.18
K.ERPTPSLNNNC*TTSEDSLVLYNR.V	P07814	0.85		-.MRECISIHVGQAGVQIGNAC*WELYCLEHGIQPDGQMPSDK.T	Q71U36	1.07		R.LAAHC*AR.W	Q96C12	1.18
K.QC*PEDHLYVLEHNLHLLIR.E	Q9NVC6	0.85		R.NTPLC*DSFVFRK.V	O95573	1.07		K.LMC*TNAMIYNKPETIYYK.A	Q9NPI1	1.18
K.SC*YGKK.Y	P21291	0.85		K.SLC*MFEIPKE.-	Q9NWA0	1.07		R.LNC*AEYKNWVK.A	Q8TB03	1.18
K.SC*YGKK.Y	Q16527	0.85		K.ATC*APQHGAPGPGPADASK.V	P21333	1.07		-.MPAHSLVMSSPALPAFLLC*STLLVIK.M	O14684	1.18
R.KSDIYVC*MISFAHNVAAQGK.Y	P50395	0.85		R.GLDLSSGLVVTSLC*K.S	Q9Y2Y0	1.07		R.NALVSHLDGTTPVC*EDIGR.S	P31930	1.18
R.SNIMTLLFQC*MQDSMPEVR.Q	O14787	0.85		K.NMSVHLSPC*FR.D	P62280	1.07		R.NAQTFGFNLSSLC*K.L	Q9NSV4	1.18
K.TC*FSPNR.V	O00303	0.85		R.AFLLDPDRC*VVQR.L	P0CB43	1.07		K.VQRPC*TSTPMIDSFVR.L	Q14694	1.18
K.TLVQQLYTTLC*IEQHQLNK.E	Q8NE86	0.85		R.KLTAQEAC*SR.G	Q8N8U2	1.07		K.ALAPLLLAFVTKPNSALESC*SFAR.H	P46060	1.18
K.TYPGVMHSSC*PQEMAAVK.E	O95372	0.85		R.AC*DLPAWVHFPDTER.A	A0FGR8	1.07		R.SC*KPKPIGK.L	P11586	1.18
R.VQTDAFVSNELDDPDDLQC*K.R	Q9UI10	0.85		R.ALQELPLC*LR.L	Q9NQS1	1.07		K.SC*KPIPVMLLGVTLLK.K	P78383	1.18
R.VQYLEDTDPFAC*ANFPEPR.R	Q9Y613	0.85		R.DLPLMALPPCHALC*QFYVVNSELSCQLYQR.S	P04818	1.07		R.VLEC*LASGIVMPDGSGIYDPCEKEATDAIGHLDR.Q	Q12906	1.18
R.RYC*VRPNSGIIDPGSTVTVSVMLQPFDYDPNEK.S	Q9P0L0	0.85		R.FLQNSLGAVPSPIDC*YLCNR.G	P32929	1.07		R.VLGPC*SDILKR.N	P10644	1.18
R.KAVVVC*PKDEDYKQR.T	Q00839	0.84		R.FSC*EPAGGLTSLTEPPKGPGFGVQAGL.-	P19404	1.07		K.VQENC*IDLVGR.I	O75533	1.18
K.GPEEKKDC*EVVMMIGLPGAGK.T	Q00839	0.84		R.GLTDC*C*LK.T	Q9Y619	1.07		R.LVTEC*EQK.K	Q06546	1.18
K.IISNASC*TTNCLAPLAK.V	P04406	0.84		K.INQMVC*NSDR.V	P06400	1.07		R.WLCTGDIGEFEPDGC*LK.I	O95573	1.18
R.GRAEVLISTVGPEDC*VVPFLTRPK.V	P56192	0.84		R.RLGIPEC*ILLVTQR.I	Q12802	1.07		R.IVEDEPNKIC*EADR.V	P55060	1.17
R.GSSSYSQLLAATC*LTK.L	Q9UIA9	0.84		K.KLYC*QELK.K	Q9BVP2	1.07		K.SLSGGASYVDFLC*HMHK.E	P53992	1.17
K.NTPSFLIAC*NKQDIAMAK.S	Q9Y5M8	0.84		K.QSTC*EAVMILR.S	P40425	1.07		R.ISAFGYLEC*SAK.T	P08134	1.17
R.GNVAGDSKNDPPMEAAGFTAQVIILNHPGQISAGYAPVLDCHTAHIAC*K.F	P68104	0.84		K.QSTC*EAVMILR.S	P40426	1.07		K.IFC*C*HGGLSPDLQSMEQIRR.I	P36873	1.17
K.TKFENLC*K.I	P07900	0.84		R.SC*TPSPDQISHR.A	Q7Z2W4	1.07		K.IFC*C*HGGLSPDLQSMEQIRR.I	P62136	1.17
K.C*NKEVYFAER.V	P50238	0.84		K.VAC*AEEWQESR.T	O75663	1.07		K.IFC*C*HGGLSPDLQSMEQIRR.I	P62140	1.17
R.ESSYAC*YYDEKR.S	Q99538	0.84		K.VALLC*GPPGLGK.T	Q8WVB6	1.07		K.LGVENC*YFPMFVSQSALEKEK.T	P07814	1.17
K.LPEEEAEC*YFHSRPK.S	Q9NVS9	0.84		R.VSLIC*PLVK.M	Q8N2W9	1.07		R.YLIGSGDNPTIVQEGC*R.Y	Q86XL3	1.17
R.RAAC*DLVR.G	P55060	0.84		K.MKYDFSC*ELYR.M	Q13490	1.07		R.EANSIIITPGYGLC*AAK.A	Q13423	1.17
K.GLC*EKPLASAAAK.A	Q9Y5L0	0.84		K.WDFTPC*K.N	P38606	1.07		K.VAPLVQSLC*AK.H	O60427	1.17
K.AAVSTNC*R.A	P78346	0.84		R.SRGALGSIALLGLVGTTVC*SAFQHLGWVK.S	O14880	1.06		R.EGYTSFWNDC*ISSGLR.G	Q9H4A6	1.17
K.AGC*AVTSLLASELTK.D	O60610	0.84		K.VLNEEC*DQNWYK.A	P62993	1.06		K.AFSWLTC*LLRHERIHTGK.K	Q9H7R0	1.17
R.ALQSLAC*GKPTQR.V	Q13618	0.84		R.SCYDLSC*HAR.A	P41250	1.06		K.ALVGLVNDESPEIQAQC*NK.V	O43156	1.17
K.C*LQQALHTFQNDIHVYPIWLC*PFILPSQPGLVHPK.G	Q15392	0.84		K.FLEVIKPFC*VILPEIQKPERK.I	P61619	1.06		K.C*EFAVGYQR.L	Q9P2J5	1.17
R.C*YYSNTDAVIYVVDSC*DRDR.I	P40616	0.84		K.KGAC*AVEGSK.K	Q14527	1.06		R.VVYGGGAAEISCALAVSQEADKC*PTLEQYAMR.A	P48643	1.17
K.C*DSMTMTPGPWLGLPAVPAVTLYK.H	Q6P996	0.84		R.LKSYC*NDQSTGDIK.V	P00492	1.06		K.C*SLPAEEDSVLEK.L	P27816	1.17
R.CGLAC*ER.C	Q96FX8	0.84		K.SEGTYC*C*GPVPVR.A	P21980	1.06		R.EANDALNAYVC*K.G	Q68E01	1.17
R.C*KIPNTVEEAVR.I	Q12996	0.84		K.AADC*ISEPVNREPPSR.E	P43304	1.06		R.KEEEC*QAGAAEMR.E	Q96JB5	1.17
K.C*SGIGDNPGSETAAPR.A	P50851	0.84		R.AVGDGILC*NTYIDSYK.G	Q53EL6	1.06		K.GTQC*AR.I	P30085	1.17
K.C*VGAELEYDSEHSDWHGFD.-	Q9GZN8	0.84		R.C*WLGAK.V	Q9BXP8	1.06		K.LGNNC*VFAPADVTSEKDVQTALALAK.G	Q99714	1.17
R.DVC*TELLPLIKPQGR.V	P16152	0.84		K.QIFQEDKDLVPEFVHSEGLSC*LIR.V	Q9Y613	1.06		K.LLAPDC*EIIQEVGK.L	Q9NQT5	1.17
K.FGGSFLNC*VR.E	Q5T6V5	0.84		R.FRDQDLASC*DRDR.S	Q9Y383	1.06		R.KLLAPDC*EIIQEVGK.L	Q9NQT5	1.17
K.FIC*TTSAIQNR.F	P53396	0.84		R.EANSIIITPGYGLC*AAK.A	Q13423	1.06		R.NQASCGSC*YSFASMGMLEAR.I	P53634	1.17
K.GLTDLSAC*K.A	O00567	0.84		K.EGAMAC*TVAVEESIAHHYNNQIR.T	Q99807	1.06		K.TSRQEC*QLSR.E	Q63ZY3	1.17
R.IC*DEC*NYGSYQGR.C	Q7RTV0	0.84		R.FALAC*NASDKIIEPIQSR.C	P35250	1.06		R.VEEEHLWEC*K.Q	Q14202	1.17
K.IC*AFLLR.K	Q8N556	0.84		R.RGTDEC*AIESIAVAATPIPK.L	P53634	1.06		K.EATTTLHMLTLLKDLLPC*FPEGLVK.S	Q5JTH9	1.17
K.MLDEQDVPAAEQMC*FETSAK.T	Q9NX57	0.84		R.IAQLIC*ER.I	P33316	1.06		R.RAAC*DLVR.G	P55060	1.17
K.NFLGSC*DPQVILK.Q	P50748	0.84		R.IIATC*GELLR.H	P83436	1.06		K.REC*GNAHYQR.A	Q14318	1.17
R.LAVTRPHLQAYLC*LAK.A	Q9NX61	0.84		R.INISEGNC*PER.I	P57721	1.06		K.KDC*EVVMMIGLPGAGK.T	Q00839	1.16
R.QYLPGNEQGVAC*SGSDPSWK.C	O76071	0.84		R.INISEGNC*PER.I	Q15365	1.06		R.KENQWC*EEK.-	P63208	1.16
R.SSLPEFQAAPEAEPEPGEPLLQVTLVDC*PGHASLIR.T	P57772	0.84		R.INISEGNC*PER.I	Q15366	1.06		R.VC*ALLSCTSHK.D	P15121	1.16
R.TDC*SPIQFESAWALTNIASGTSEQTK.A	P52292	0.84		K.LGC*FEIAK.M	O60502	1.06		K.GELGC*FLSHYNIWK.E	Q8NBJ5	1.16
R.TFSGHEDC*VR.G	Q9Y263	0.84		R.LGDLLISQFSGPSAEQMC*K.T	Q92974	1.06		R.EGVC*AASLPTTMGVVAGILVQNVLK.F	Q9GZZ9	1.16
R.TPC*EEILVK.H	P21333	0.84		K.LLMMAGIDDC*YTSAR.G	P15880	1.06		K.ALANVNIGSLIC*NVGAGGPAPAAGAAPAGGPAPSTAAAPAEEK.K	P05386	1.16
R.VFIMDNC*EELIPEYLNFIR.G	P07900	0.84		R.LQGINC*GPDFTPSFANLGR.T	Q04637	1.06		R.LSAPGCWAAC*TNFSR.T	Q04941	1.16
K.VLNEEC*DQNWYK.A	P62993	0.84		R.NVLITSALPYVNNVPHLGNIIGC*VLSADVFAR.Y	P56192	1.06		R.LALC*LTGLVLSLYALHVK.A	E9PLN8	1.16
R.VTDGALVVVDCVSGVC*VQTETVLR.Q	P13639	0.84		K.SSSLNSGNYLNPAC*R.N	Q9UQR0	1.06		R.LALC*LTGLVLSLYALHVK.A	Q9BQB6	1.16
K.TFVGTPC*WMAPEVMEQVR.G	Q9UEW8	0.84		R.VAAAESMPFLLEC*AR.I	O60518	1.06		K.SLEIC*HPQER.N	Q9Y305	1.16
K.VIEQLGTPC*PEFMK.K	P45983	0.84		R.VVLPC*SVQEYQVGQLYSVAEASK.N	P48739	1.06		K.CCLTYC*FNKPEDK.-	P62979	1.16
K.VIEQLGTPC*PEFMK.K	P53779	0.84		K.YMNCGQTC*IAPDYILCEASLQNQIVWK.I	P51648	1.06		K.FLTFKDC*DPGEVNK.A	Q9NYK5	1.16
R.LC*LQSIAFISR.L	P57088	0.84		K.LFDDC*TQQFK.A	Q13362	1.06		K.LC*PLKDEPWPIHPWEPGSFR.V	P09001	1.16
R.VTELNPDKNC*IHTDDDEKISYR.Y	Q9Y6N5	0.83		K.YMAC*CLLYRGDVVPK.D	P68366	1.06		R.ALLVTNTLGC*GALMAAGDGVR.Q	Q567V2	1.16
K.KAVLFC*LSEDKK.N	P23528	0.83		K.YMAC*CLLYRGDVVPK.D	Q71U36	1.06		K.AILTDQPMIC*TPR.L	Q8IZV5	1.16
K.RFASGGC*DNLIK.L	P55735	0.83		R.QVC*QLPGLFSYAQHIASIDGRR.G	Q9Y6C9	1.06		K.SACGVC*PGR.L	P49207	1.16
R.EGSPVLLNC*LMYK.M	P46977	0.83		R.DHKAC*LPDAK.T	O15091	1.06		R.GLQC*GAPLSLVDLAGSER.L	Q9BW19	1.16
K.FIDPFC*R.I	P56182	0.83		K.GNTAEGC*VHETQEK.Q	Q9BQG0	1.06		R.DADADAGGGADGGDGRGGHSC*R.G	Q14657	1.16
R.KC*SAAALDVLANVYRDELLPHILPLLK.E	Q92973	0.83		R.TDDYLDQPC*YETINR.I	P50395	1.05		K.AC*DEGHCTAK.D	P26440	1.16
K.AC*PHVWFER.S	Q53EU6	0.83		K.KYKVEYPIMYSTDPENGHIFNC*IQR.A	O14880	1.05		K.APVPSTC*SSTFPEELSPPSHQAK.R	Q14980	1.16
K.AC*PHVWFER.S	Q86UL3	0.83		K.MGVPYC*IIK.G	P62424	1.05		K.C*GFLPGNEK.V	Q9UL46	1.16
K.C*NNPNGHGHNYK.V	Q03393	0.83		K.ETTNIFSNC*GCVR.A	Q9UBB4	1.05		K.DITDPLSLNTC*TDEGHVVLASPLK.T	Q7L2J0	1.16
K.QGFWEEFETLQQQEC*K.L	Q06124	0.83		R.RGNVAGDSKNDPPMEAAGFTAQVIILNHPGQISAGYAPVLDC*HTAHIACK.F	P68104	1.05		K.DSEDNPQTLLFSATC*PHWVFNVAK.K	Q9NR30	1.16
K.VVNEINIEDLC*LTK.A	Q8N5K1	0.83		K.NIANPTATLLASC*MMLDHLK.L	P51553	1.05		K.KDSEDNPQTLLFSATC*PHWVFNVAK.K	Q9NR30	1.16
K.KGKPHC*SR.N	Q02878	0.83		K.WASGLTPAQNC*PR.A	O15533	1.05		K.NWYREHC*PAGQPVK.V	Q6P2Q9	1.16
R.IATPFQVYSWTAPQAEHAMDC*VR.A	O75153	0.83		R.GALVTVGQLSC*YDQAK.Q	Q9UBX3	1.05		K.KFDEKENVSNC*IQLK.T	Q9ULC4	1.16
K.YKVEYPIMYSTDPENGHIFNC*IQR.A	O14880	0.83		R.VSNEEKLNLC*R.K	Q9NZ42	1.05		R.EQC*EQLEK.C	P07919	1.16
K.WASGLTPAQNC*PR.A	O15533	0.83		R.LSPDVGHLVLTTLC*PALHALVADGLKPFR.K	Q9BVN2	1.05		R.IRESIQEDLAEEAPC*LQGGR.A	O15357	1.16
K.WFPEVTHFC*R.G	Q9HBH0	0.83		R.EDPYGVAVGGTVGHC*LC*TGLAVIGGR.M	Q9HC07	1.05		R.FFLGDLC*SR.Q	Q15738	1.16
R.IIC*SAGLSLLAEER.Q	Q9BV86	0.83		K.GNSPPSSGEAC*REEK.G	P41227	1.05		R.FISFLQELSC*FVTR.C	Q2M389	1.16
R.LSAPGC*WAAC*TNFSR.T	Q04941	0.83		K.SWMEGLTLQDYSEHC*KHNESVVK.E	O00487	1.05		R.FPSTIC*TESFQFLDR.M	Q12789	1.16
R.KGADIMYTGTVDC*WR.K	P12235	0.83		K.AAVPLGGFLC*NVADK.S	Q7L8L6	1.05		R.GITNLC*VIGGDGSLTGANLFRK.E	Q01813	1.16
R.KGADIMYTGTVDC*WR.K	P12236	0.83		R.MAQDLKDIIEHLNTSGAPADTSDPLQQIC*K.I	P37198	1.05		K.HHPDLIFC*R.K	Q7RTV0	1.16
R.RGTDEC*AIESIAVAATPIPK.L	P53634	0.83		R.C*QFQTK.F	Q7Z5G4	1.05		K.ILLDDTGLAYIC*QTYER.F	Q92600	1.16
R.TTMRPQSFYDGSHSC*AR.G	Q13126	0.83		R.FSSAVGLVTIVEC*C*PVLLGPPLLGR.L	P53985	1.05		R.LDFVC*SFLQK.N	Q14980	1.16
K.ADLVISHAGAGSC*LETLEK.G	Q9NP73	0.83		K.GFC*LDVIR.N	Q9HCU9	1.05		K.LHC*IMPHVK.Q	Q9NUL7	1.16
K.AINC*PEDIVFPALDILR.L	Q9Y263	0.83		R.GGQDC*R.G	Q9C0J8	1.05		R.LQLEAC*GMR.R	Q9H4A6	1.16
K.ANSIQGC*K.M	Q86WR0	0.83		K.SKLTFSCLGGSDNFKHLNEIDLFHC*IDPNDSK.H	Q15185	1.05		R.LVLSAQSC*FFR.S	Q9NVX7	1.16
K.AQISC*AK.D	Q9NX70	0.83		R.IC*QELTAAAR.P	Q9BW92	1.05		R.NQC*EGIKK.Y	O14980	1.16
[truncated: 2,911 more rows]

## Sheet: Target sites
sequence	Uniprot ID	Average ratio(Control/Cisplatin)	p value	x(log2(Average ratio))	y(-log10(p-value))	x*y
K.C*LELFSELAEDKENYKK.F	P08238	15	1e-15	3.90689	15	58.6034
K.SWC*PDCVQAEPVVR.E	Q9BRA2	15	1e-15	3.90689	15	58.6034
K.LLDIAC*WIHHK.Y	P07339	14.9967	1.93005e-14	3.90657	13.7144	53.5764
R.SGGSGGC*SGAGGASNC*GTGSGR.S	Q15005	5.77	0.000378556	2.52857	3.42187	8.65244
K.SSSSSSASAAAAAAAASSSASC*SR.R	Q07065	2.01667	3.39571e-08	1.01197	7.46907	7.55849
K.IIPTLEEGLQLPSPTATSQLPLESDAVEC*LNYQHYK.G	P61978	6.38	0.00231099	2.67356	2.6362	7.04803
K.QCSAGC*AAMERPKPEEK.R	Q17RY6	4.25667	0.000631807	2.08972	3.19942	6.6859
R.LYYFQYPC*YQEGLR.S	Q9NRW3	2.61667	9.80765e-05	1.38773	4.00843	5.56263
R.C*ALSSPSLAFTPPIK.T	Q8NFH5	2.59	9.20554e-05	1.37295	4.03595	5.54117
R.YSSSFC*THDR.N	P04183	3.63	0.00109003	1.85997	2.96256	5.51027
K.GSEEVDSHC*KK.A	Q9Y4W2	3.84333	0.00177593	1.94236	2.75057	5.3426
R.TELLNVC*MNAK.H	P15328	6.11	0.0111922	2.61117	1.95109	5.09462
R.MVESC*LGSPC*WASPQLLR.I	Q9Y4W2	5.21	0.0074855	2.38128	2.12578	5.06208
K.DAGGKSWC*PDCVQAEPVVR.E	Q9BRA2	11.5233	0.0389008	3.52649	1.41004	4.97249
R.RASC*TSSTSGSKR.N	P13807	1.53333	9.15289e-09	0.616671	8.03844	4.95708
K.RPAC*TLKPEC*VQQLLVCSQEAKK.S	P32320	2.21667	7.26442e-05	1.14839	4.1388	4.75296
K.GTPEQPQC*GFSNAVVQILR.L	Q86SX6	6.08	0.0149594	2.60407	1.82508	4.75265
K.IKSGEEDFESLASQFSDC*SSAK.A	Q13526	2.34	0.000159957	1.22651	3.796	4.65582
R.TC*QFC*PQFR.E	P21580	1.61667	2.5065e-07	0.693022	6.60093	4.57459
R.SGGSGGC*SGAGGASNCGTGSGR.S	Q15005	3.67667	0.00372874	1.8784	2.42844	4.56157
R.VCETDGC*SSEAK.L	P53582	7.22667	0.026343	2.85333	1.57934	4.50636
K.C*KPVPLLELAEGQK.Q	Q8NHV4	3.24333	0.00261368	1.69748	2.58275	4.38416
R.TDFQQGC*AK.T	O95571	2.07	8.0048e-05	1.04963	4.09665	4.29997
K.RPAC*TLKPEC*VQQLLVCSQEAK.K	P32320	2.30333	0.000300487	1.20372	3.52217	4.23972
R.KC*PFYAAEQDKGALEGSSC*PFR.T	P30519	2.01	6.26933e-05	1.0072	4.20278	4.23302
K.C*NAEEHVR.V	P11279	1.90667	3.08364e-05	0.931053	4.51094	4.19992
K.LPIIGVVENMSGFIC*PK.C	P53384	4.74	0.0145904	2.24489	1.83593	4.12146
K.AIALFTPDAC*GLSDPAHVESLQEK.A	P10588	2.73333	0.00146661	1.45066	2.83368	4.11072
K.VVVFIKPTC*PYC*R.R	P35754	11.01	0.066144	3.46074	1.17951	4.08198
K.VVVFIKPTC*PYCR.R	P35754	3.36	0.00559069	1.74846	2.25253	3.93847
R.ALSC*LGPTHMGPLALGILK.L	Q6PJG6	7.67	0.0459322	2.93923	1.33788	3.93234
K.TAFQEALDAAGDKLVVVDFSATWC*GPCK.M	P10599	10.9067	0.0727477	3.44714	1.13818	3.92347
K.VGILDVDLC*GPSIPR.M	Q9Y5Y2	2.94	0.00346285	1.55582	2.46057	3.82819
R.DLAALEQQC*DEHR.R	Q9UKD1	9.00667	0.0634597	3.17099	1.1975	3.79727
R.MTC*HKR.Y	Q9BVP2	3.2	0.00773135	1.67807	2.11174	3.54366
K.SGEEDFESLASQFSDC*SSAK.A	Q13526	2.43667	0.00175384	1.28491	2.75601	3.54122
R.EAC*WALR.V	Q6NXE6	2.74	0.00367616	1.45418	2.43461	3.54035
R.GASC*QGCPNQR.L	P53384	2.75667	0.00441902	1.46292	2.35467	3.44471
R.GASCQGC*PNQR.L	P53384	2.75667	0.00441902	1.46292	2.35467	3.44471
R.EMASC*ITQR.K	Q969E8	3.39333	0.0114512	1.7627	1.94115	3.42167
K.SC*GSSSHENRPLDLLHK.M	Q7Z6Z7	3.42667	0.0123739	1.77681	1.90749	3.38924
R.NYLEPGKEC*VQPATK.S	P16615	1.75333	6.65406e-05	0.8101	4.17691	3.38372
R.SITC*WTLSR.Y	Q92973	1.93667	0.000299189	0.953576	3.52405	3.36045
R.C*QSPWTEALWVR.L	Q6PJG6	3.89	0.021213	1.95977	1.6734	3.27947
R.WLSC*TATPQIEEEVSLTQK.N	P52948	2.08667	0.00085866	1.0612	3.06618	3.25383
R.RQLC*GGNQAATER.I	Q6VN20	3.74333	0.0198403	1.90432	1.70245	3.24202
R.VLDC*GAAPGAWSQVAVQK.V	Q9UI43	9.26333	0.105374	3.21153	0.977267	3.13852
R.ALC*DVGTAISC*SR.V	E9PLN8	4.90667	0.0432318	2.29474	1.3642	3.13048
K.C*EQDREPLR.T	Q9HB19	2.15333	0.00148475	1.10657	2.82835	3.12977
R.LLDRDAC*DTVR.V	Q9NZL4	1.69667	8.75427e-05	0.762703	4.05778	3.09488
K.NNQESDC*VSK.K	A6NDG6	1.73333	0.000130183	0.793549	3.88544	3.08329
R.FQAEC*PHLC*ETSLAGR.A	Q99956	2.11667	0.00148223	1.08179	2.82908	3.06049
R.C*ILTTVDPDTGVMSR.K	Q5VT66	2.31667	0.00304133	1.21205	2.51694	3.05065
R.EGRLEDVENLGC*R.L	Q9UJX3	1.75667	0.000196995	0.81284	3.70555	3.01202
K.TIPDDTPMC*R.I	Q6R327	2.30667	0.0034505	1.20581	2.46212	2.96885
K.SAC*GNCYLGDAFR.C	Q6FI81	1.81667	0.000365532	0.861294	3.43707	2.96033
R.RC*GAQDKEHPR.Y	Q96GX9	2.84667	0.0112394	1.50927	1.94926	2.94196
R.EAC*EHSGEAK.A	Q9BWG4	2.21	0.00273402	1.14405	2.5632	2.93242
R.RGNVAGDSKNDPPMEAAGFTAQVIILNHPGQISAGYAPVLDC*HTAHIAC*K.F	P68104	2.98667	0.0164829	1.57854	1.78297	2.81448
R.C*IQMWFDPAQGNPNEEVAR.F	P15328	3.60333	0.0313284	1.84933	1.50406	2.78151
R.VVC*SSGAVGNYSGGLAVKEWLLAHEGHR.L	P16455	1.93	0.00136503	0.948601	2.86486	2.71761
R.KTAGQTGMC*GGVR.G	Q5VTL8	3.01333	0.019703	1.59136	1.70547	2.71401
K.KPLKPC*C*ACPETK.K	Q14061	8.21	0.129634	3.03738	0.887281	2.69501
R.LFNC*SASLDWPR.M	Q9Y4W2	3.26	0.0274966	1.70487	1.56072	2.66083
K.GGLLC*TLQGK.L	O43292	4.2	0.0528014	2.07039	1.27735	2.64462
R.AC*SVGAVPGITK.F	Q9NVN8	2.17	0.00526041	1.1177	2.27898	2.54721
K.SLLNQC*IEER.Y	Q96GM8	2.22	0.0065561	1.15056	2.18335	2.51208
R.NADC*SSGPGQR.V	Q9BSD7	3.38	0.0380023	1.75702	1.42019	2.49531
R.VMTIPYQPMPASSPVIC*AGGQDR.C	Q15365	3.83667	0.0521337	1.93985	1.28288	2.4886
R.C*HTIMNC*TR.T	P21912	6.17667	0.113562	2.62683	0.944768	2.48174
R.ATGHSGGGC*ISQGR.S	Q9HA64	1.94667	0.00267441	0.961006	2.57277	2.47245
R.VC*LC*PMIIGR.G	P18074	2.51	0.0146687	1.32769	1.83361	2.43446
K.GSRHPC*ITK.T	P52701	1.58	0.000210647	0.659925	3.67644	2.42618
R.NAC*IEC*SVNQNSIR.N	Q9UBB4	1.62667	0.000364971	0.701919	3.43774	2.41301
K.C*ASQSGMTAYGTR.R	Q99439	3.32667	0.0425898	1.73408	1.37069	2.37689
K.ISSNC*PK.A	P10398	2.01333	0.00475538	1.00959	2.32281	2.34508
K.QC*SAGCAAMERPKPEEK.R	Q17RY6	3.36667	0.0460565	1.75132	1.33671	2.34101
K.ASGQPAGPDNKENC*PVPGKPGEAVAAR.K	P04183	3.82333	0.061931	1.93483	1.20809	2.33745
R.NLVQC*GDFPHLLVYGPSGAGKK.T	P40938	1.99	0.00466309	0.992768	2.33133	2.31447
K.ILDHLTMIDNKNESELEAHLC*R.M	Q14008	2.58667	0.0247363	1.37109	1.60667	2.20289
R.SRGEEQGC*QGDGDAGVK.A	Q13671	1.76	0.00213861	0.815575	2.66987	2.17748
K.SC*SGVEFSTSGHAYTDTGK.A	Q9Y277	2.80333	0.0357411	1.48714	1.44683	2.15165
R.SQKPEAGGC*GAPAAR.E	O60343	1.95667	0.00605254	0.968398	2.21806	2.14797
K.TKSC*SGVEFSTSGSSNTDTGKVTGTLETK.Y	P45880	1.92	0.0055544	0.941106	2.25536	2.12254
R.AAAAC*LDK.A	Q9H3U1	3.39333	0.0629892	1.7627	1.20073	2.11654
R.APLAVTSQVINC*R.N	P42695	2.34333	0.019106	1.22856	1.71883	2.11169
R.FC*PFAER.T	P78417	2.57	0.0307307	1.36177	1.51243	2.05958
K.AC*VVHGSDLK.D	P05023	4.58667	0.118497	2.19745	0.926294	2.03548
R.ASC*TSSTSGSKR.N	P13807	1.64667	0.00161018	0.719549	2.79312	2.00979
R.GNVAGDSKNDPPMEAAGFTAQVIILNHPGQISAGYAPVLDC*HTAHIAC*K.F	P68104	3.65	0.0868791	1.8679	1.06108	1.982
R.FSFC*CSPEPEAEAEAAAGPGPCER.L	Q13501	2.12	0.0150574	1.08406	1.82225	1.97544
K.GVLFGVPGAFTPGC*SK.T	P30044	2.64667	0.0395237	1.40418	1.40314	1.97026
K.LC*RPC*QAAVEYYIK.H	Q5SNT2	2.01	0.0118215	1.0072	1.92733	1.9412
K.ETTNIFSNC*GC*VR.A	Q9UBB4	1.92667	0.00889629	0.946107	2.05079	1.94027
K.KPLKPCC*ACPETK.K	Q14061	2.01	0.0118851	1.0072	1.925	1.93885
R.TMC*PLLSMKPGEYSYFSPR.T	Q15003	2.37	0.0281412	1.24489	1.55066	1.93039
K.C*VAGKDLPEGAVK.G	Q92616	2.63	0.0428977	1.39506	1.36757	1.90784
R.GQTVC*NVK.L	Q92621	1.95	0.0106412	0.963474	1.97301	1.90094
R.TREEEC*HFYAGGQVYPGEASR.V	Q13162	2.19667	0.0212477	1.13532	1.67269	1.89903
R.TKETNC*ESDRER.G	Q7Z6Z7	1.99333	0.0132058	0.995183	1.87923	1.87018
R.EC*AC*AGLAR.L	Q7Z4Q2	2.78667	0.0561001	1.47854	1.25104	1.84971
R.LKDAVAHC*HEAER.N	P49792	1.96333	0.0129416	0.973305	1.88801	1.83761
R.KGSSNNQDVVTC*DMAC*K.G	Q6NUQ4	2.15	0.0222552	1.10434	1.65257	1.82499
K.QFLDFGSSNAC*EK.T	Q15119	6.87	0.222629	2.78031	0.652419	1.81393
K.TSC*ALTIHAIGR.Y	Q5VYK3	1.71	0.00463677	0.773996	2.33378	1.80634
K.KINPIC*NDHYR.S	Q96KB5	2.58333	0.0505315	1.36923	1.29644	1.77513
R.FDPTQFQDC*IIQGLTETGTDLEAVAK.F	Q7L1Q6	2.71333	0.0586926	1.44007	1.23142	1.77332
R.KKC*PSTHSEELHDCIQK.T	P48507	1.62	0.00289105	0.695994	2.53894	1.76709
R.EAIHALSSSEDGGHIFC*TLESLKR.Y	Q9Y4R8	3.88667	0.125604	1.95853	0.900997	1.76463
R.RFSFC*CSPEPEAEAEAAAGPGPCER.L	Q13501	1.88	0.0116412	0.910733	1.934	1.76136
K.NASC*GTR.S	P60468	1.69667	0.00501235	0.762703	2.29996	1.75419
K.KGVLFGVPGAFTPGC*SK.T	P30044	2.96333	0.0762352	1.56722	1.11784	1.75191
R.HTAC*NEQQR.T	Q5T4S7	2.24	0.0320598	1.1635	1.49404	1.73831
R.VHIPNDDAQFDASHC*DSDKGEFGGFGSVTGK.I	Q16576	1.72333	0.00655319	0.785202	2.18355	1.71453
K.C*ASQVGMTAPGTR.R	Q99439	3.11667	0.090785	1.64	1.04199	1.70886
R.LAVLMEAQC*R.Q	Q9Y4R8	2.17667	0.0313377	1.12212	1.50393	1.68759
R.VLDALFPC*VQGGTTAIPGAFGC*GK.T	P38606	2.57667	0.0584879	1.36551	1.23293	1.68358
K.VLVVSVC*PQSLPYFAAK.F	Q9UHQ1	1.5	0.00140694	0.584963	2.85173	1.66815
R.QGVC*IGLSEIMK.S	Q92616	2.44333	0.0508244	1.28885	1.29393	1.66768
R.VMGIVENMSGFTCPHCTEC*TSVFSR.G	Q9Y5Y2	2.03333	0.0253099	1.02385	1.59671	1.63479
K.SC*SGVEFSTSGSSNTDTGKVTGTLETK.Y	P45880	2.25667	0.041025	1.17419	1.38695	1.62855
K.AAQGPPAPAVPPNTDVMAC*TQTALLQK.L	O60232	1.63333	0.0050303	0.707819	2.29841	1.62686
K.TLELLVC*R.V	Q9BXW9	1.84	0.014239	0.879706	1.84652	1.62439
R.LWDSHVC*GVSLLSHR.W	Q9Y6M0	6.59333	0.254231	2.72101	0.594772	1.61838
R.KFPYC*EATLLQQLVR.S	Q8IV38	1.75667	0.0102587	0.81284	1.98891	1.61666
R.SVVC*QESDLPDELLYGR.A	Q9NS86	2.10333	0.0314146	1.07268	1.50287	1.61209
R.KC*VPSVVVGVVGMGHVPGIEK.N	Q9H4I3	1.8	0.0134112	0.847997	1.87253	1.5879
R.KVAEPELMGTPDGTC*YPPPPVPR.Q	P27708	1.50667	0.00206731	0.59136	2.68459	1.58756
R.SNAALALQLAHC*WLQR.Q	Q05932	1.52667	0.00255512	0.610385	2.59259	1.58248
K.AIVLFTSDAC*GLSDVAHVESLQEK.S	P24468	2.15	0.0372189	1.10434	1.42924	1.57836
R.KVEEVTKVC*EGR.R	P37198	1.52333	0.00277692	0.607232	2.55644	1.55235
K.MLSC*AGADR.L	P27635	2.45	0.0647876	1.29278	1.18851	1.53648
R.C*EMASTGEVAC*FGEGIHTAFLK.A	P31327	1.84	0.0179856	0.879706	1.74508	1.53515
R.AIQTVSC*LLQGPC*DAGNR.A	Q9H3U1	2.96	0.107757	1.5656	0.967556	1.5148
R.TLLVNC*QNK.S	Q8TC07	2.10333	0.0388744	1.07268	1.41034	1.51284
